# Supplementary material for: Carbonate-Capped Seamount Subduction Accelerates CO2-Rich Arc Magma Ascent: Insights from Pagan Volcano, Mariana Arc
Source: Research Square preprint supplement (doi:10.21203/rs.3.rs-6662658/v1), 2025-05-28
Supplement: Supplementary file 2 [file 4a6308d5f5cef247b5e2c2b9.xlsx]

## Sheet: Table S1
Supplementary Table S1. Chemical compositions and volumes of melt inclusions and their host olivines from Pagan volcano
Sample olivine_name	MI_name	Determined with X-ray 3D				Raman spectrometry													Nano SIMS analysis				Mass Balance Calculationc						Major compoistion in MI													Major composition in host olivine
		Melt inclusion (3D)	Bubble(3D)			NUM1a			NUM2			(NUM1+NUM2)/2
		Volume	Dimension	Volume	Bubble/MI	v- position	v+ position	∆CO2	v- position	v+ position	∆CO2	∆CO2	Corrected ∆CO2	Bubble CO2 densityb	std_Bubble CO2 density	CO2 content in bubble from MI	std_CO2 content in bubble	CO2 weight in bubble from MI	H2O in glass	Error	CO2 in glass	Error	Density of glass	CO2 in glass	CO2 weight in glass	Fraction of CO2 weight in glass	Total CO2	Erro_total CO2	SiO2	TiO2	Al2O3	FeOt	MnO	MgO	CaO	Na2O	K2O	P2O5	Cr2O3	Total	Mg#	SiO2	TiO2	Al2O3	FeOt	MnO	MgO	CaO	Na2O
		(cm3)	(cm)	(cm3)	(volume%)	(cm-1)	(cm-1)	(cm-1)	(cm-1)	(cm-1)	(cm-1)	(cm-1)	(cm-1)	(g*cm-3)	(g*cm-3)	(ppm)	(ppm)	(g)	(ppm)	(2σ)	(ppm)	(2σ)	(g/cm3)	(wt.%)	(g)		(wt.%)	(wt.%)	(wt.%)	(wt.%)	(wt.%)	(wt.%)	(wt.%)	(wt.%)	(wt.%)	(wt.%)	(wt.%)	(wt.%)	(wt.%)	(wt.%)	(mol.%)	(wt.%)	(wt.%)	(wt.%)	(wt.%)	(wt.%)	(wt.%)	(wt.%)	(wt.%)
R21OL29	OL29-MI-1	5.85759e-08	0.002143	5.10806e-09	8.72042	1285.29	1388.16	102.871	1285.25	1388.14	102.886	102.879	103.008	0.0844449	0.0042172	2843.22	141.991	4.3135e-10	30196.3	1781.51	545.195	49.8872	2.59	0.0545195	7.54995e-11	0.148959	0.366005	0.0144166	46.712	0.322	15.077	7.756	0.153	8.193	16.154	1.381	0.279	0.053	0.069	96.149	67.6647	42.36	0.015	0.026	9.6	0.181	49.07	0.283	0
	OL29-MI-2	4.61928e-07	0.004032	3.40213e-08	7.36507	1285.25	1388.14	102.886	1285.33	1388.11	102.78	102.833	102.963	0.0665518	0.02949	1892.51	838.594	2.26418e-09	28680	1641.75	360.451	33.242	2.59	0.0360451	3.9948e-10	0.149974	0.240342	0.0838758	46.037	0.311	15.11	7.885	0.138	8.804	15.585	1.372	0.311	0.089	0.124	95.766	68.8654	41.54	0.014	0.026	9.19	0.182	49.51	0.286	0
	OL29-MI-3	1.21027e-08	0.001222	9.47116e-10	7.82566	1285.45	1388.24	102.791	1285.37	1388.23	102.857	102.824	102.953	0.0629352	0.018067	1923.86	552.29	5.96069e-11	28911.2	1646.02	323.023	29.8613	2.56	0.0323023	9.22498e-12	0.134022	0.241022	0.0552491	47.173	0.448	16.376	7.545	0.136	5.143	17.185	1.612	0.283	0.052	0.052	96.005	57.4526	42.52	0.015	0.028	9.55	0.18	49.43	0.299	0
R21OL38	OL38-MI-1	8.33583e-08	0.0023	6.315e-09	7.57573	1285.26	1388.06	102.796	1285.24	1388.09	102.843	102.82	102.983	0.074342	0.0128619	2174.5	376.21	4.69469e-10	28387.8	1795.95	460.484	58.6247	2.59	0.0460484	9.1886e-11	0.163686	0.281322	0.037735	46.229	0.369	15.522	7.724	0.156	7.484	16.369	1.603	0.284	0.056	0	95.796	65.7467	40.77	0.018	0.027	9.7	0.186	48.74	0.279	0.002
	OL38-MI-2	2.66927e-08	0.0015236	1.8357e-09	6.87718	1285.32	1388.21	102.892	1285.33	1388.13	102.803	102.847	103.01	0.0852443	0.0244426	2263.48	649.021	1.56483e-10	28143	1754.57	519.664	66.1069	2.59	0.0519664	3.34557e-11	0.176139	0.29503	0.0649862	46.675	0.361	16.453	7.925	0.131	5.809	16.601	1.603	0.261	0.048	0.03	95.897	59.2178	41.02	0.015	0.025	9.8	0.193	48.63	0.288	0
R21OL46	OL46-MI-1	2.6e-07	0.0052	7.29793e-08	28.069	1284.82	1387.77	102.951	1284.84	1387.77	102.93	102.941	103.098	0.11934	0.0057613	12049.4	581.703	8.70933e-09	45404.2	2739.58	949.145	86.3374	2.78	0.0949145	4.93477e-10	0.0536225	1.77005	0.0583303	40.061	0.798	17.734	5.452	0.055	6.959	17.26	2.825	0.786	0.317	0.001	92.248	71.6597	41.69	0.033	0.067	6.48	0.089	52.84	0.112	0.001
R21OL8	OL8-MI-1	5.24182e-08	0.001862	3.35065e-09	6.39214	1285.88	1388.74	102.865	1285.87	1388.71	102.844	102.854	103.009	0.0846011	0.00582771	2087.96	143.828	2.83468e-10	28126.8	1768.19	627.206	79.5365	2.59	0.0627206	7.97084e-11	0.219476	0.285775	0.0149225	46.117	0.41	15.472	7.169	0.136	7.963	16.411	1.638	0.312	0.04	0.025	95.693	68.7537	42.35	0.017	0.034	9.63	0.178	49.62	0.291	0
	OL8-MI-2	1.13994e-07	0.002529	8.3953e-09	7.36468	1285.84	1388.69	102.844	1285.81	1388.68	102.867	102.856	103.01	0.0851988	0.00632857	2441.49	181.354	7.15269e-10	29899.6	1876.64	595.569	75.5842	2.57	0.0595569	1.61631e-10	0.184321	0.323116	0.018525	46.06	0.349	15.677	6.761	0.181	7.443	16.526	1.502	0.366	0.089	0.06	95.014	68.5614	42.26	0.014	0.037	9.12	0.171	49.59	0.264	0
R21OL16	OL16-MI-1	3.22983e-08	0.001869	3.38858e-09	10.4915	1285.74	1388.61	102.872	1285.73	1388.61	102.881	102.876	103.042	0.0974586	0.00250154	4009.76	102.921	3.30246e-10	32063.9	2004.14	565.519	71.9627	2.55	0.0565519	4.16899e-11	0.112089	0.504527	0.010903	46.574	0.409	17.019	6.515	0.163	5.194	17.193	1.91	0.407	0.089	0.023	95.496	61.2299	41.55	0.021	0.038	8.84	0.166	49.28	0.312	0
	OL19-MI-2	9.69982e-07	0.005655	9.38615e-08	9.67663	1284.98	1387.85	102.878	1284.97	1387.84	102.871	102.874	103.036	0.0954305	0.00204219	3593.17	76.893	8.95724e-09	34487.7	2183.92	553.808	70.3063	2.57	0.0553808	1.24697e-09	0.122201	0.453193	0.00845475	44.806	0.35	14.556	7.131	0.141	9.706	16.019	1.481	0.433	0.085	0.004	94.712	72.946	42.49	0.023	0.038	8.74	0.161	49.95	0.266	0
R21OL20	OL20-MI-1	1.70578e-07	0.003332	1.92001e-08	11.2559	1284.92	1387.82	102.907	1284.89	1387.82	102.927	102.917	103.088	0.115413	0.00546797	5054.79	239.483	2.21595e-09	36869.1	2227.55	646.946	59.2624	2.57	0.0646946	2.51688e-10	0.101996	0.634287	0.0241309	45.869	0.401	15.047	7.257	0.127	8.135	16.527	1.515	0.358	0.089	0.059	95.384	68.9503	42.11	0.021	0.039	8.71	0.156	50.2	0.24	0
R21OL17	OL17-MI-1	2.73908e-08	0.001884	3.47082e-09	12.6715	1284.39	1387.28	102.883	1284.41	1387.26	102.845	102.864	103.012	0.0859404	0.0104849	4220.9	514.958	2.98284e-10	33012.9	2048.27	922.548	119.738	2.58	0.0922548	5.69337e-11	0.160278	0.575591	0.0518427	45.358	0.423	17.09	6.524	0.147	4.481	18.258	1.565	0.384	0.077	0.074	94.381	57.6384	41.73	0.013	0.038	8.27	0.158	49.47	0.246	0
	OL17-MI-2	9.29228e-09	0.001416	1.4736e-09	15.8583	1284.48	1387.22	102.735	1284.52	1387.26	102.749	102.742	102.89	0.0382985	0.00381319	2391.14	238.074	5.64366e-11	32499.6	1851.36	601.25	54.9683	2.54	0.060125	1.19405e-11	0.174627	0.344305	0.0239655	46.379	0.429	16.147	6.616	0.113	4.936	17.825	1.551	0.383	0	0.057	94.436	59.644	42.29	0.017	0.04	8.8	0.163	48.95	0.254	0
	OL17-MI-5	3.92603e-08	0.001982	4.04111e-09	10.2931	1284.33	1387.21	102.884	1284.32	1387.21	102.894	102.889	103.037	0.0957125	0.00272845	3863.45	110.134	3.86785e-10	36003.7	2049.82	573.571	52.5525	2.55	0.0573571	5.15118e-11	0.117527	0.488032	0.0113226	45.964	0.424	15.653	6.755	0.129	7.269	17.338	1.656	0.365	0.056	0.021	95.63	68.0686	41.78	0.017	0.033	8.7	0.159	49.16	0.257	0
	OL17-MI-6	3.3072e-08	0.00182	3.12899e-09	9.46114	1284.39	1387.24	102.851	1284.4	1387.29	102.886	102.869	103.017	0.087847	0.00982907	3259.35	364.683	2.74872e-10	32698.4	1863.21	570.846	52.3371	2.55	0.0570846	4.35867e-11	0.136868	0.417079	0.0365621	46.429	0.371	16.087	6.837	0.125	6.087	17.1	1.574	0.354	0.121	0.075	95.16	63.8162	41.59	0.019	0.041	8.5	0.159	49.25	0.26	0
R21OL25	OL25-MI-2	4.2793e-08	0.001987	4.07177e-09	9.51503	1285.21	1388.08	102.873	1285.17	1388.02	102.855	102.864	103.02	0.0890533	0.0048841	3362.48	184.414	3.62604e-10	30237.6	836.394	491.198	44.9132	2.52	0.0491198	4.793e-11	0.11675	0.420726	0.0185776	46.706	0.434	16.906	5.542	0.147	4.998	17.747	1.908	0.453	0.016	0.035	94.892	64.113	42.29	0.025	0.027	7.69	0.146	49.69	0.382	0
R21OL28	OL28-MI-1	3e-09	0.000846	3.14268e-10	10.4756	1285.23	1388.03	102.806	1285.23	1388.03	102.807	102.807	102.956	0.0637679	0.000287788	2609.41	11.7764	2.00402e-11	30399.2	817.03	489.525	44.6133	2.56	0.0489525	3.36571e-12	0.143797	0.340427	0.00252244	46.275	0.373	16.671	6.992	0.111	4.466	17.698	1.523	0.33	0.05	0.082	94.571	55.8559	41.9	0.667	0.033	9.57	0.177	48.57	0.868	0.047
	OL31-MI-3	1.101e-08	0.001377	1.35516e-09	12.3085	1284.97	1387.91	102.943	1285.01	1387.91	102.891	102.917	103.046	0.099109	0.0142261	4802.69	689.379	1.34309e-10	30240.6	790.09	452.831	41.2872	2.54	0.0452831	1.11049e-11	0.0763674	0.592963	0.0689688	46.072	0.489	16.446	5.654	0.115	6.095	16.446	1.894	0.625	0.086	0.032	93.954	68.107	42.22	0.024	0.051	7.67	0.134	50.3	0.222	0
R21OL36	OL36-MI-1	4.46264e-09	0.0009493	4.44017e-10	9.94966	1285.18	1388.02	102.837	1285.14	1388.01	102.873	102.855	103.016	0.087275	0.0100477	3405.32	392.043	3.87516e-11	31030.5	866.395	655.351	59.6473	2.55	0.0655351	6.7157e-12	0.147704	0.443692	0.0393176	47.546	0.429	15.589	6.46	0.112	4.792	18.025	1.691	0.325	0.07	0.071	95.11	59.5056	41.74	0.009	0.03	9.22	0.178	47.6	0.264	0
R21OL21	OL21-MI-1	4.35e-08	0.0020343	4.36953e-09	10.0449	1285.74	1388.57	102.834	1285.78	1388.57	102.797	102.815	102.979	0.0728069	0.0102275	2867.99	402.881	3.18132e-10	31104.2	875.296	367.513	33.7656	2.55	0.0367513	3.66714e-11	0.103357	0.355576	0.0403234	46.297	0.433	16.483	6.331	0.118	6.864	17.059	1.816	0.515	0.109	0.039	96.064	68.2313	42.1	0.018	0.037	8.45	0.156	49.54	0.226	0
R21OL2	OL2-MI-1	5.55501e-07	0.00492	6.18137e-08	11.1276	1285.8	1388.68	102.889	1285.82	1388.69	102.867	102.878	103.022	0.0896912	0.00585538	3898.61	254.516	5.54414e-09	31079.1	869.617	472.515	43.2143	2.56	0.0472515	5.97183e-10	0.0972401	0.485926	0.0255432	47.758	0.302	12.769	6.111	0.137	11.015	16.083	1.403	0.249	0.023	0.098	95.948	78.1214	42.02	0.017	0.049	7.8	0.145	49.33	0.235	0
R21OL5	OL5-MI-1	2.14e-08	0.0014859	1.70278e-09	7.95691	1285.15	1387.99	102.839	1285.14	1387.97	102.832	102.836	103.019	0.0885477	0.00180698	2730.88	55.7285	1.50777e-10	31541.5	868.676	524.883	47.7622	2.58	0.0524883	2.66739e-11	0.150317	0.349184	0.00606298	46.834	0.357	15.451	7.21	0.15	7.608	17.394	1.366	0.322	0.031	0.06	96.783	67.641	41.87	0.016	0.03	9.43	0.182	48.84	0.289	0
R21OL18	OL18-MI-1	6.88451e-08	0.00227	6.0711e-09	8.81848	1284.94	1387.82	102.875	1284.94	1387.81	102.863	102.869	103.041	0.0970983	0.00324038	3318.84	110.757	5.89493e-10	27794.3	782.152	519.419	47.4	2.58	0.0519419	8.41235e-11	0.124883	0.415923	0.0113264	46.563	0.398	15.63	6.865	0.149	7.043	17.114	1.396	0.406	0.078	0.017	95.659	67.0222	42.32	0.02	0.04	8.46	0.164	48.79	0.265	0
R21OL13	OL13-MI-2	1.11163e-07	0.00294	1.31896e-08	11.8651	1285.12	1387.97	102.853	1285.09	1387.96	102.876	102.864	103.032	0.0937377	0.0062926	4310.88	289.389	1.23636e-09	28356.4	758.839	340.044	31.1262	2.58	0.0340044	8.59533e-11	0.0650021	0.523127	0.0289807	46.062	0.378	13.868	5.825	0.126	9.392	17.132	1.372	0.304	0.047	0.03	94.536	76.1567	41.92	0.02	0.052	7.48	0.142	48.99	0.292	0
R21OL4	OL4-MI-1	1.11752e-07	0.002771	1.10433e-08	9.88198	1284.28	1387.14	102.864	1284.25	1387.17	102.921	102.893	103.045	0.0987782	0.015773	3783.43	604.141	1.09084e-09	30001.4	802.26	450.483	41.0282	2.58	0.0450483	1.17048e-10	0.0969034	0.464878	0.0604489	45.893	0.45	14.845	6.246	0.127	9.269	16.395	1.531	0.412	0.094	0.098	95.36	74.6177	41.99	0.02	0.048	8.08	0.15	48.14	0.217	0
aNUM refers to the number of tests
bBubble density calculated and corrected by the equation (4) in Devitre et al. (2021).
cThe CO2 content of the trapped melt can be reconstructed using a mass-balance approach from Esposito et al. (2011).
[truncated: 4 more columns]

## Sheet: Table S2
Supplementary Table S2. Melt compositions corrected for PEC/PEM and Fe–Mg diffusion using MIMiC
MI_name	SiO2	TiO2	Al2O3	Fe2O3	FeO	FeOT	MnO	MgO	CaO	Na2O	K2O	P2O5	S	Cl	H2O	CO2	SUM	Mg#	XFo	TcCO2	TcMGO	Teqolv	Ta	OLV ADD	KD
	(wt.%)	(wt.%)	(wt.%)	(wt.%)	(wt.%)	(wt.%)	(wt.%)	(wt.%)	(wt.%)	(wt.%)	(wt.%)	(wt.%)	(ppm)	(ppm)	(wt.%)	(ppm)	(wt.%)	(mol.%)	(mol.%)	(℃)	(℃)	(℃)	(℃)	(%)
OL29-MI-1	46.4652	0.30947	14.4903	1.92004	6.12565	7.8533	0.147046	9.75797	15.5254	1.32726	0.268143	0.0509376	2009.19	836.145	2.90213	3517.62	99.9258	71.1101	90.1118	1054.17	0	1145	1182.81	4.01	0.311473
OL29-MI-2	45.9577	0.303561	14.7486	1.88096	6.00095	7.69343	0.134699	9.93536	15.2122	1.33918	0.303561	0.0868712	2044.45	761.343	2.7994	2345.94	99.2182	71.8963	90.5705	1069.33	0	1156.28	1181.85	2.56	0.307203
OL29-MI-3	46.474	0.401219	14.666	1.90038	6.06291	7.77287	0.121799	9.67915	15.3905	1.44367	0.253448	0.04657	1847.14	823.931	2.58922	2158.54	99.5118	71.155	90.2229	911.451	0	1059.36	1182.61	11.66	0.30832
OL38-MI-1	45.9347	0.351253	14.7755	1.92189	6.13155	7.86086	0.148497	9.42704	15.5817	1.5259	0.270341	0.0533067	1917.57	666.333	2.70225	2677.91	99.3501	70.3762	89.9583	1023.17	0	1126.53	1175.47	4.98	0.305893
OL38-MI-2	46.2811	0.333888	15.2173	1.89636	6.05008	7.75642	0.121161	9.24989	15.3542	1.48261	0.241398	0.044395	2033.55	730.668	2.60294	2728.72	99.4246	70.2594	89.8447	950.818	0	1083.49	1173.93	8.3	0.30795
OL46-MI-1	39.6025	0.637724	14.1722	1.85503	5.91823	7.58738	0.0439534	14.1304	13.7934	2.25761	0.628134	0.253331	4720.74	1566.34	3.62849	14145.4	98.9642	78.6747	93.5642	1066.25	0	1118.38	1295.63	23.13	0.292742
OL8-MI-1	45.7207	0.390765	14.7461	1.89736	6.05327	7.76051	0.12962	9.49993	15.6411	1.56115	0.297363	0.0381234	1988.65	848.246	2.68073	2723.68	99.2123	70.8028	90.1831	1040.34	0	1137.14	1177.51	4.55	0.304513
OL8-MI-2	45.4273	0.322684	14.4949	1.87601	5.98515	7.67318	0.167352	9.98231	15.2799	1.38874	0.338402	0.082289	1999.56	933.841	2.7645	2987.51	98.7016	72.0446	90.6493	1018.27	0	1122.65	1189.57	7.54	0.306642
OL16-MI-1	45.5101	0.353075	14.6919	1.9088	6.08976	7.80729	0.140712	10.4575	14.8421	1.64883	0.351348	0.0768305	2337.11	742.407	2.76796	4355.4	99.5824	72.6284	90.8583	925.707	0	1064.3	1209.75	15.17	0.30792
OL19-MI-2	44.5666	0.34068	14.1684	1.8679	5.9593	7.64004	0.137245	10.3961	15.5924	1.44156	0.42147	0.0827366	2759.95	1080.44	3.35694	4411.25	99.1565	72.9408	91.0629	1125.31	0	1174.17	1191.88	2.39	0.30517
OL20-MI-1	45.3841	0.37142	13.937	1.89931	6.05949	7.76848	0.117632	10.8805	15.3079	1.40325	0.331592	0.0824349	2166.32	1037.38	3.41494	5874.98	100.097	73.5067	91.1313	1061.33	0	1141.53	1207.91	7.66	0.311471
OL17-MI-1	44.3133	0.354817	14.3353	1.88242	6.00561	7.69942	0.123305	10.9697	15.315	1.31274	0.322104	0.0645885	2257.47	914.304	2.76916	4828.12	98.568	73.8384	91.4273	900.002	0	1037.62	1219.6	18.44	0.305211
OL17-MI-2	45.3397	0.370738	13.9541	1.87823	5.99223	7.68226	0.0976535	10.2742	15.4042	1.34036	0.330985	0	2381.15	820.981	2.80858	2975.45	98.4087	72.5979	90.8402	907.78	0	1049.25	1198.59	15.03	0.308123
OL17-MI-5	45.3041	0.386168	14.2563	1.88523	6.01457	7.7109	0.11749	10.4491	15.791	1.50824	0.332432	0.0510033	2487.62	883.45	3.27912	4444.87	100.156	72.8588	90.9701	1007.59	0	1114.4	1196.3	9.27	0.307357
OL17-MI-6	45.5442	0.326262	14.1471	1.88489	6.01349	7.70952	0.109927	10.781	15.038	1.38419	0.311312	0.106409	2173.03	826.648	2.87554	3667.84	99.189	73.4761	91.174	962.459	0	1087.18	1209.85	13.18	0.30926
OL25-MI-2	45.1323	0.354647	13.8149	1.87461	5.98068	7.66745	0.120122	11.8238	14.5021	1.55914	0.370173	0.0130746	2058.48	1045.96	2.47089	3438	98.6707	75.338	92.013	911.439	0	1053.88	1241.56	20.99	0.305843
OL28-MI-1	45.3961	0.327466	14.6359	1.89255	6.03793	7.74084	0.0974495	9.43575	15.5375	1.33708	0.289715	0.0438962	2144.74	851.586	2.66881	2988.69	98.2986	70.715	90.0483	890.321	0	1037.09	1181.38	13.47	0.307804
OL31-MI-3	44.6316	0.406423	13.6688	1.87629	5.98606	7.67435	0.0955801	12.0725	13.6688	1.57416	0.519457	0.0714773	2965.76	1653.95	2.5134	4928.31	98.0393	75.7061	92.1211	986.606	0	1096.09	1253.58	18.72	0.30739
OL36-MI-1	46.3914	0.373916	13.5874	1.88356	6.00923	7.70406	0.0976191	9.72381	15.7106	1.47387	0.28327	0.0610119	2003.63	906.463	2.70462	3867.22	98.978	71.4312	90.2004	922.319	0	1054.16	1196.43	14.07	0.3133
OL21-MI-1	45.337	0.382467	14.5594	1.91818	6.11968	7.84566	0.104229	10.8987	15.0682	1.60407	0.454898	0.0962793	2670.8	1148.29	2.74742	3140.79	99.9864	73.3465	91.2683	982.15	0	1105.34	1211.29	12.35	0.303639
OL2-MI-1	46.911	0.282921	11.9623	1.91291	6.10288	7.82412	0.128345	12.2594	15.067	1.31437	0.233269	0.021547	2063.52	815.038	2.91157	4552.28	99.8506	75.6332	91.8537	1187.89	0	1211.92	1245.87	5.64	0.31756
OL5-MI-1	46.3355	0.33481	14.4906	1.92246	6.13337	7.8632	0.140676	9.81314	16.3128	1.28109	0.301986	0.0290731	2073.28	947.222	2.9581	3274.8	100.683	71.2	90.2286	1015.45	0	1124	1180.82	6.32	0.308758
OL18-MI-1	45.7143	0.355873	13.9756	1.92125	6.12949	7.85823	0.133229	10.891	15.3025	1.24824	0.363026	0.0697439	1980.27	974.627	2.48523	3718.99	99.2569	73.3013	91.1364	1017.81	0	1118.43	1217.15	11.2	0.307975
OL13-MI-2	45.0975	0.342223	12.5554	1.85743	5.92587	7.59718	0.114074	11.9541	15.5105	1.24214	0.275227	0.0425515	1983.32	905.352	2.56725	4736.14	98.2468	75.7108	92.1116	1136.47	0	1176.43	1242.2	9.14	0.307858
OL4-MI-1	45.1521	0.41794	13.7874	1.90077	6.06415	7.77447	0.117952	11.0695	15.227	1.42193	0.382648	0.0873031	2220.57	938.044	2.7864	4317.59	99.1627	73.8259	91.3958	1107.17	0	1169.41	1217.29	6.65	0.306241
aT calculated by eq. 4 of Putirka et al. (2007)

## Sheet: Table S3
Supplementary Table S3. Results of pressure estimates based on volatile contents in melt inclusions, calculated using MagmaSat in VESIcal and MafiCH
	Calculated by MagmaSata in VESIcalb				Calculated by MafiCHc
MI_name	SaturationP_bars_VESIcal	Depth	XH2O_fluid	XCO2_fluid	SaturationP	Depth	XH2O_fluid	XCO2_fluid
	(bar)	(km)	(mol.%)	(mol.%)	(bar)	(km)	(mol.%)	(mol.%)
OL29-MI-1	5280	20.183	0.270809	0.729191	3319	14.0053	0.219	0.781
OL29-MI-2	4020	16.215	0.314281	0.685719	2522	11.4911	0.3	0.7
OL29-MI-3	3750	15.3641	0.292908	0.707092	2368	11.0051	0.322	0.678
OL38-MI-1	4280	17.0342	0.281331	0.718669	2699	12.0496	0.278	0.722
OL38-MI-2	4510	17.7587	0.256384	0.743616	3090	13.2831	0.238	0.762
OL46-MI-1	7350	26.6909	0.351333	0.648667	8123	29.1177	0.061	0.939
OL8-MI-1	4260	16.9712	0.279396	0.720604	2609	11.7656	0.289	0.711
OL8-MI-2	4580	17.9792	0.281704	0.718296	3004	13.0118	0.246	0.754
OL16-MI-1	5640	21.3157	0.248038	0.751962	3882	15.7801	0.18	0.82
OL19-MI-2	5520	20.9382	0.328834	0.671166	3807	15.5438	0.185	0.815
OL20-MI-1	6760	24.8374	0.300568	0.699432	4518	17.7839	0.148	0.852
OL17-MI-1	6320	23.4543	0.269246	0.730754	4023	16.2245	0.172	0.828
OL17-MI-2	4490	17.6957	0.295852	0.704148	2812	12.4062	0.265	0.735
OL17-MI-5	5590	21.1584	0.316227	0.683773	3332	14.0463	0.218	0.782
OL17-MI-6	5160	19.8053	0.281559	0.718441	3344	14.0841	0.217	0.783
OL25-MI-2	4590	18.0107	0.250775	0.749225	2954	12.8541	0.119	0.881
OL28-MI-1	4700	18.3571	0.261229	0.738771	2858	12.5513	0.26	0.74
OL31-MI-3	5800	21.8191	0.223697	0.776303	4386	17.3681	0.154	0.846
OL36-MI-1	5360	20.4347	0.239687	0.760313	2997	12.9898	0.246	0.754
OL21-MI-1	4390	17.3807	0.294728	0.705272	3274	13.8634	0.222	0.778
OL2-MI-1	5720	21.5674	0.272448	0.727552	2863	12.5671	0.26	0.74
OL5-MI-1	4930	19.0813	0.293235	0.706765	3104	13.3273	0.237	0.763
OL18-MI-1	5200	19.9312	0.228442	0.771558	3141	13.444	0.111	0.889
OL13-MI-2	5720	21.5674	0.230606	0.769394	3387	14.2197	0.213	0.787
OL4-MI-1	5460	20.7494	0.261659	0.738341	3765	15.4114	0.187	0.813
	Closed degassing path calculated by MagmaSata in VESIcalb
	Magmasat	Pressure_bars	H2O_liq	CO2_liq	XH2O_fluid	XCO2_fluid	Fluid Proportion_wt.%
	0	6683.8	3.38237	5709.5	0.297659	0.702341	55.0575
	1	6547.6	3.35228	5516.25	0.297987	0.702013	55.0806
	2	6411.4	3.32175	5327.2	0.29832	0.70168	55.1037
	3	6275.2	3.29078	5142.25	0.298658	0.701342	55.1268
	4	6139	3.25935	4961.32	0.299001	0.700999	55.1499
	5	6002.8	3.22744	4784.34	0.29935	0.70065	55.173
	6	5866.6	3.19503	4611.21	0.299705	0.700295	55.1961
	7	5730.4	3.1621	4441.87	0.300065	0.699935	55.2193
	8	5594.2	3.12863	4276.23	0.300432	0.699568	55.2425
	9	5458	3.09459	4114.22	0.300805	0.699195	55.2658
	10	5321.8	3.05998	3955.77	0.301184	0.698816	55.2892
	11	5185.6	3.02476	3800.8	0.30157	0.69843	55.3127
	12	5049.4	2.98891	3649.26	0.301963	0.698037	55.3363
	13	4913.2	2.9524	3501.06	0.302363	0.697637	55.36
	14	4777	2.91521	3356.15	0.302771	0.697229	55.3838
	15	4640.8	2.87732	3214.47	0.303186	0.696814	55.4078
	16	4504.6	2.83868	3075.95	0.30361	0.69639	55.432
	17	4368.4	2.79928	2940.54	0.304041	0.695959	55.4563
	18	4232.2	2.75908	2808.18	0.304482	0.695518	55.4809
	19	4096	2.71804	2678.81	0.304931	0.695069	55.5057
	20	3959.8	2.67613	2552.4	0.30539	0.69461	55.5307
	21	3823.6	2.6333	2428.88	0.305858	0.694142	55.5559
	22	3687.4	2.58952	2308.21	0.306336	0.693664	55.5815
	23	3551.2	2.54473	2190.35	0.306825	0.693175	55.6073
	24	3415	2.49888	2075.25	0.307325	0.692675	55.6335
	25	3278.8	2.45193	1962.89	0.307837	0.692163	55.66
	26	3142.6	2.40379	1853.21	0.308361	0.691639	55.6869
	27	3006.4	2.35441	1746.19	0.308897	0.691103	55.7142
	28	2870.2	2.30371	1641.79	0.309448	0.690552	55.742
	29	2734	2.2516	1539.99	0.310013	0.689987	55.7702
	30	2597.8	2.19797	1440.75	0.310593	0.689407	55.799
	31	2461.6	2.14271	1344.05	0.311191	0.688809	55.8284
	32	2325.4	2.0857	1249.87	0.311806	0.688194	55.8584
	33	2189.2	2.02677	1158.19	0.312441	0.687559	55.8891
	34	2053	1.96575	1068.98	0.313097	0.686903	55.9206
	35	1916.8	1.89732	980.734	0.313832	0.686168	55.9554
	36	1780.6	1.82388	894.373	0.314619	0.685381	55.9922
	37	1644.4	1.74861	810.85	0.315424	0.684576	56.0297
	38	1508.2	1.67113	730.069	0.316249	0.683751	56.068
	39	1372	1.59101	651.935	0.3171	0.6829	56.1073
	40	1235.8	1.50766	576.359	0.317982	0.682018	56.1478
	41	1099.6	1.42036	503.251	0.318903	0.681097	56.1899
	42	963.4	1.3281	432.53	0.319873	0.680127	56.234
	43	827.2	1.22953	364.123	0.320905	0.679095	56.2808
	44	691	1.12269	297.973	0.322019	0.677981	56.3309
	45	554.8	1.00468	234.052	0.323244	0.676756	56.3858
	46	418.6	0.870716	172.381	0.324627	0.675373	56.4475
	47	282.4	0.711978	113.072	0.326256	0.673744	56.5197
	48	146.2	0.507228	56.4484	0.328342	0.671658	56.6117
	49	10	0.12806	3.59341	0.332158	0.667842	56.7787
	50	5	0.090102	1.78284	0.332537	0.667463	56.7952
	51	1	0.0400123	0.352871	0.333036	0.666964	56.8169
aGhiorso MS, Gualda GAR. An H2O–CO2 mixed fluid saturation model compatible with rhyolite-MELTS. Contributions to Mineralogy and Petrology 169, 53 (2015).
bWieser PE, Iacovino K, Matthews S, Moore G, Allison CM. VESIcal: 2. A Critical Approach to Volatile Solubility Modeling Using an Open-Source Python3 Engine. Earth and Space Science 9, e2021EA001932 (2022).
cAllison CM, Roggensack K, Clarke AB. MafiCH: a general model for H2O–CO2 solubility in mafic magmas. Contributions to Mineralogy and Petrology 177, 40 (2022).

## Sheet: Table S4
Supplementary Table S4. Chemical compositions of standard samples
Major elements of glass
No.	Na2O	SiO2	Al2O3	FeO	MgO	CaO	K2O	TiO2	MnO	P2O5	Total
	(wt.%)	(wt.%)	(wt.%)	(wt.%)	(wt.%)	(wt.%)	(wt.%)	(wt.%)	(wt.%)	(wt.%)	(wt.%)
ref. Jochum et al. (2005)	3.23	54.4	13.4	12.4	3.56	7.06	1.74	2.27	0.19	0.37
BCR-2G-1	3.097	54.916	13.53	12.126	3.525	6.996	1.701	2.237	0.191	0.389	98.708
BCR-2G-2	3.349	55.053	13.837	12.579	3.561	7.257	1.785	2.119	0.225	0.348	100.113
BCR-2G-3	3.127	54.003	13.536	11.962	3.559	6.714	1.846	2.091	0.195	0.312	97.345
BCR-2G-4	3.117	53.469	13.72	11.963	3.605	6.961	1.632	2.156	0.207	0.312	97.142
BCR-2G-5	3.361	53.709	13.715	12.834	3.53	7.076	1.788	2.253	0.166	0.344	98.776
BCR-2G-6	3.073	54.29	13.392	12.557	3.554	7.12	1.757	2.108	0.211	0.273	98.335
BCR-2G-7	3.106	54.442	13.497	12.437	3.517	6.976	1.735	2.2	0.198	0.374	98.482
Average	3.17571	54.2689	13.6039	12.3511	3.55014	7.01429	1.74914	2.16629	0.199	0.336
SD	0.123683	0.589914	0.15629	0.338525	0.0298799	0.167683	0.0688947	0.0646316	0.0185023	0.0399625
SE	0.0467479	0.222967	0.059072	0.12795	0.0112935	0.0633782	0.0260397	0.0244284	0.00699319	0.0151044
2SE%	9.34958	44.5933	11.8144	25.5901	2.25871	12.6756	5.20795	4.88569	1.39864	3.02088
2RSD. %	7.78932	2.17404	2.29773	5.48168	1.68331	4.78118	7.87754	5.96704	18.5952	23.7872
Major elements in ol
No.	SiO2	Al2O3	FeO	MgO	CaO	TiO2	MnO	Cr2O3	NiO	Total
	(wt.%)	(wt.%)	(wt.%)	(wt.%)	(wt.%)	(wt.%)	(wt.%)	(wt.%)	(wt.%)	(wt.%)
ref. Batanova et al. (2019)	41.6	-	7.25	50.97	-	-	-	-	0.37	100.19
MongOl-std-Major-1	41.802	0.008	7.189	51.268	0.012	0	0.082	0	0.353	100.714
MongOl-std-Major-2	41.639	0.012	7.19	50.938	0	0.011	0.079	0.003	0.367	100.239
MongOl-std-Major-3	41.449	0.003	7.079	50.729	0.003	0	0.133	0.011	0.377	99.784
Average	41.63	0.00766667	7.15267	50.9783	0.005	0.00366667	0.098	0.00466667	0.365667
SD	0.176672	0.00450925	0.0637992	0.271754	0.006245	0.00635085	0.030348	0.00568624	0.0120554
SE	0.102002	0.00260342	0.0368345	0.156897	0.00360555	0.00366667	0.0175214	0.00328295	0.0069602
2SE%	20.4003	0.520683	7.36689	31.3795	0.72111	0.733333	3.50428	0.656591	1.39204
2RSD. %	0.848773	117.633	1.78393	1.06616	249.8	346.41	61.9347	243.696	6.59367
Jochum, K.P., Nohl, U., Herwig, K., Lammel, E., Stoll, B., Hofmann, A.W., 2005. GeoReM: A New Geochemical Database for Reference Materials and Isotopic Standards. Geostandards and Geoanalytical Research 29, 333-338.
Batanova, V.G., Thompson, J.M., Danyushevsky, L.V., Portnyagin, M.V., Garbe-Schönberg, D., Hauri, E., Kimura, J.-I., Chang, Q., Senda, R., Goemann, K., Chauvel, C., Campillo, S., Ionov, D.A., Sobolev, A.V., 2019. New Olivine Reference Material for In Situ Microanalysis. Geostandards and Geoanalytical Research 43, 453-473.

## Sheet: Table S5
Supplementary Table S5. Pressure calculated from published volatile data in melt inclusions (glass+bubble) of Klyuchevskoy by Magamsat in VESIcal, after PEC corrections
Arc	Volcano	Name	Host mineral	Host Mg#	wt.% SiO2	wt.% TiO2	wt.% Al2O3	wt.% Fe2O3	wt.% FeO	wt.% MnO	wt.% MgO	wt.% CaO	wt.% Na2O	wt.% K2O	wt.% H2O	wt.% CO2	CaO/Al2O3	Temp	SaturationP_bars_VESIcal	XH2O_fl_VESIcal	XCO2_fl_VESIcal	Model	depth	Reference
Kamchatka	Klyuchevskoy	C10-1-1	Olivine	90.9	47.7559	0.874137	15.3494	1.33456	4.47389	0.104064	7.89421	11.1453	2.82013	0.541133	4.65166	0.390448	0.726102	1172.41	5910	0.443169	0.556831	MagmaSat	22.1651	Mironov et al., 2015
Kamchatka	Klyuchevskoy	C10-1-2	Olivine	87.7	46.4147	1.10255	15.1965	1.87258	6.30186	0.156022	7.95508	9.92298	2.8916	0.686496	4.78467	0.399936	0.652977	1174.7	5810	0.483111	0.516889	MagmaSat	21.8505	Mironov et al., 2015
Kamchatka	Klyuchevskoy	C10-1-3	Olivine	86.6	49.4649	0.885225	15.0172	1.80354	5.8647	0.136999	6.96286	9.63209	2.92967	0.558535	4.87927	0.417426	0.641404	1177.42	6470	0.444271	0.555729	MagmaSat	23.9259	Mironov et al., 2015
Kamchatka	Klyuchevskoy	C10-2-1	Olivine	87.3	48.221	0.787703	13.7796	1.81144	5.95984	0.168043	7.48898	12.1621	2.38412	0.451617	4.87326	0.401414	0.882622	1170.59	6030	0.470552	0.529448	MagmaSat	22.5425	Mironov et al., 2015
Kamchatka	Klyuchevskoy	C10-2-2a	Olivine	89.7	48.742	0.932806	15.4742	1.42363	4.78647	0.11401	7.26352	11.3595	3.23373	0.580413	4.05252	0.374366	0.734092	1168.75	5460	0.381995	0.618005	MagmaSat	20.7494	Mironov et al., 2015
Kamchatka	Klyuchevskoy	C10-2-4	Olivine	88.6	49.073	0.815587	13.396	1.72209	5.99211	0.142728	8.74442	10.7046	2.28364	0.428183	4.9445	0.375272	0.799087	1176.73	5940	0.486393	0.513607	MagmaSat	22.2594	Mironov et al., 2015
Kamchatka	Klyuchevskoy	C8-1-4a	Olivine	88.259	49.2944	0.745775	13.4898	1.97266	6.37651	0.147951	9.02689	10.8683	2.10058	0.465815	5.08291	0.374777	0.805671	1214.09	6140	0.513745	0.486255	MagmaSat	22.8884	Portnyagin et al., 2019
Kamchatka	Klyuchevskoy	C8-1-4b	Olivine	88.1729	49.0118	0.722864	13.1598	1.99839	6.66544	0.164752	9.36238	10.9496	2.06808	0.425955	5.23976	0.33787	0.832049	1200.67	5750	0.553223	0.446777	MagmaSat	21.6618	Portnyagin et al., 2019
Kamchatka	Klyuchevskoy	Kly-14b	Olivine	84.9	50.1234	0.972478	21.7119	1.56306	5.2995	0.102366	5.06119	10.1957	3.11193	0.69609	1.78117	0.350604	0.46959	1098.11	6640	0.103686	0.896314	MagmaSat	24.4602	Moore et al., 2018
Kamchatka	Klyuchevskoy	Kly-14c	Olivine	84.9	50.5652	1.00699	18.0847	1.60323	5.40135	0.123305	5.16792	10.7583	3.01069	0.698726	1.89067	0.179614	0.594886	1092.54	3640	0.166643	0.833357	MagmaSat	15.0174	Moore et al., 2018
Kamchatka	Klyuchevskoy	Kly-16	Olivine	85.9	49.4071	0.928983	16.8488	1.4236	5.43138	0.117345	5.7899	11.715	2.77717	0.586726	2.49359	0.308814	0.695299	1113.81	5270	0.197683	0.802317	MagmaSat	20.1515	Moore et al., 2018
Kamchatka	Klyuchevskoy	Kly-17	Olivine	85.8	49.8907	1.03164	18.1751	1.47017	5.14386	0.0809132	5.2073	11.0143	3.11516	0.697876	1.44632	0.192877	0.60601	1101.33	3820	0.103297	0.896703	MagmaSat	15.5847	Moore et al., 2018
Kamchatka	Klyuchevskoy	Kly-18a	Olivine	87.6	49.3728	0.956025	17.3203	1.33595	4.61582	0.122046	5.58803	12.5402	2.84773	0.518694	2.4104	0.298503	0.724016	1100.71	5230	0.18572	0.81428	MagmaSat	20.0256	Moore et al., 2018
Kamchatka	Klyuchevskoy	Kly-18b	Olivine	87.3	49.9323	0.982903	18.041	1.47989	4.70958	0.126826	5.45259	12.7249	2.99098	0.54958	2.23003	0.231352	0.705331	1090.13	4370	0.187193	0.812807	MagmaSat	17.3177	Moore et al., 2018
Kamchatka	Klyuchevskoy	Kly-20	Olivine	85	50.599	0.966057	17.8217	1.59248	5.64358	0.16101	5.50061	11.1801	3.01893	0.654101	1.53965	0.314673	0.627329	1118.05	5570	0.0882422	0.911758	MagmaSat	21.0955	Moore et al., 2018
Kamchatka	Klyuchevskoy	Kly-22	Olivine	85.4	47.692	1.03859	17.7513	1.39444	4.32174	0.116576	4.08687	14.5932	2.9038	0.540489	2.08777	0.16363	0.82209	1031.67	3410	0.196923	0.803077	MagmaSat	14.2922	Moore et al., 2018
Kamchatka	Klyuchevskoy	Kly-24	Olivine	89.3	50.0635	0.909766	15.648	1.34668	5.93077	0.100074	8.8247	9.76179	2.65652	0.554957	1.85592	0.280663	0.623837	1205.72	4450	0.144764	0.855236	MagmaSat	17.5697	Moore et al., 2018
Kamchatka	Klyuchevskoy	Kly-25	Olivine	84.4	50.4801	1.0419	18.6139	1.60542	5.75178	0.110201	5.16798	11.1203	3.2359	0.701278	0.751369	0.163097	0.597417	1107.59	3370	0.036373	0.963627	MagmaSat	14.1661	Moore et al., 2018
Kamchatka	Klyuchevskoy	Kly-26a	Olivine	85	52.0988	0.910138	16.4021	1.7053	6.45602	0.195729	6.31158	9.75707	3.25888	0.68505	1.44839	0.172241	0.594869	1140.96	3130	0.118757	0.881243	MagmaSat	13.4093	Moore et al., 2018
Kamchatka	Klyuchevskoy	Kly-28	Olivine	85.1	48.0484	0.98222	17.8867	1.46841	4.85064	0.12407	4.52667	14.0716	3.06039	0.537636	1.79901	0.241936	0.786705	1060.61	4360	0.131206	0.868794	MagmaSat	17.2862	Moore et al., 2018
Kamchatka	Klyuchevskoy	Kly-29	Olivine	84.9	48.9863	0.967773	17.9468	1.41486	4.19481	0.118283	3.93472	16.1188	2.78504	0.516146	2.51621	0.465499	0.898143	1033.24	6730	0.157599	0.842401	MagmaSat	24.7431	Moore et al., 2018
Kamchatka	Klyuchevskoy	Kly-3	Olivine	84.9	49.1908	0.946936	17.5698	1.53503	5.13976	0.174977	5.05672	11.672	2.75846	0.524932	2.26441	0.444236	0.664323	1099.33	7190	0.13807	0.86193	MagmaSat	26.1884	Moore et al., 2018
Kamchatka	Klyuchevskoy	Kly-30	Olivine	89.7	49.6682	0.9027	16.8048	1.3558	5.90651	0.145891	8.75591	10.0756	2.88135	0.610918	0.8024	0.123643	0.599566	1205.51	2160	0.0590251	0.940975	MagmaSat	10.3485	Moore et al., 2018
Kamchatka	Klyuchevskoy	Kly-4	Olivine	85.2	51.3042	0.996908	17.2098	1.43206	4.53794	0.115431	4.41519	12.5296	3.25307	0.713576	2.37159	0.329924	0.728049	1065.41	5600	0.16424	0.83576	MagmaSat	21.1899	Moore et al., 2018
Kamchatka	Klyuchevskoy	Kly-5	Olivine	84.6	50.2416	0.85951	17.4873	1.45752	4.47663	0.127335	4.18898	14.6329	2.72709	0.541173	2.21775	0.35293	0.836772	1051.72	6110	0.140418	0.859582	MagmaSat	22.794	Moore et al., 2018
Kamchatka	Klyuchevskoy	Kly-9b	Olivine	87.1	48.8863	0.904519	17.6582	1.36483	4.85188	0.160803	5.68671	12.9447	2.89446	0.542711	1.95979	0.703314	0.733068	1130.64	9000	0.094647	0.905353	MagmaSat	31.8688	Moore et al., 2018
Kamchatka	Klyuchevskoy	Kly-23	Olivine	86.6	47.4603	1.02823	18.1072	1.50605	5.09802	0.0822588	5.37446	10.5394	3.0847	0.730047	0.740329	0.181278	0.582056	1114.45	3650	0.0337578	0.966242	MagmaSat	15.0489	Moore et al., 2018
Kamchatka	Klyuchevskoy	Kly-8	Olivine	88.1	48.0595	0.800405	16.6306	1.42099	5.24886	0.138342	6.72793	11.6998	2.50991	0.51384	2.08501	0.28113	0.703506	1137.43	4890	0.161362	0.838638	MagmaSat	18.9553	Moore et al., 2018
Kamchatka	Klyuchevskoy	C4-1-1	Olivine	89.1	49.0141	0.563231	11.8091	1.95495	7.73311	0.131421	12.0008	9.80961	1.81173	0.328552	3.86752	0.310153	0.830684	1240.62	4820	0.444629	0.555371	MagmaSat	18.7349	Moore et al., 2018
Kamchatka	Klyuchevskoy	C4-1-2	Olivine	88.7	48.3678	0.679959	11.9785	2.04333	8.1646	0.158347	11.8697	9.19342	2.25411	0.428467	3.42774	0.267233	0.767496	1248.12	4070	0.42366	0.57634	MagmaSat	16.3726	Moore et al., 2018
Kamchatka	Klyuchevskoy	C4-1-3	Olivine	88.4	47.3435	0.629849	11.6152	2.18014	8.74592	0.18525	12.5382	8.99388	1.88029	0.342712	4.42747	0.343916	0.774322	1241.93	5280	0.519651	0.480349	MagmaSat	20.183	Moore et al., 2018
Kamchatka	Klyuchevskoy	C4-2-1a	Olivine	89.4	48.241	0.664302	12.2042	1.87302	7.29821	0.12337	11.3218	11.5304	1.80311	0.370111	3.10324	0.317062	0.94479	1234.39	4600	0.337111	0.662889	MagmaSat	18.0422	Moore et al., 2018
Kamchatka	Klyuchevskoy	C4-2-1b	Olivine	89.3	48.7648	0.634632	11.6194	1.94363	7.74831	0.158658	12.1634	10.7794	1.64258	0.345314	3.44381	0.332155	0.927711	1249.4	4840	0.385255	0.614745	MagmaSat	18.7979	Moore et al., 2018
Kamchatka	Klyuchevskoy	C4-2-2	Olivine	89.6	48.8377	0.681793	11.9682	1.89829	7.70995	0.138201	12.402	9.54511	2.04538	0.488312	3.62088	0.305149	0.797537	1253.01	4540	0.426042	0.573958	MagmaSat	17.8532	Moore et al., 2018
Kamchatka	Klyuchevskoy	C4-2-3b	Olivine	87.6	47.8407	0.691711	10.661	2.30802	10.1992	0.138342	13.5071	7.43589	2.17024	0.50149	3.75253	0.223163	0.697486	1279.1	3670	0.541801	0.458199	MagmaSat	15.1119	Moore et al., 2018
Kamchatka	Klyuchevskoy	C4-3-1	Olivine	87.6	48.5724	0.712039	12.3515	2.14176	8.35283	0.132914	10.9653	10.2913	1.96523	0.398742	3.25639	0.276651	0.833205	1229.94	4240	0.384144	0.615856	MagmaSat	16.9082	Moore et al., 2018
Kamchatka	Klyuchevskoy	C4-3-2	Olivine	89.1	47.2	0.553258	10.0465	2.18023	9.32807	0.14051	14.4435	9.04533	1.58074	0.333711	4.57536	0.339156	0.90035	1274.49	5210	0.568703	0.431297	MagmaSat	19.9627	Moore et al., 2018
Kamchatka	Klyuchevskoy	C4-4-2	Olivine	85.3	50.3286	0.729684	14.1401	2.20257	8.12625	0.16763	8.69577	8.62802	2.61306	0.453587	2.82999	0.239119	0.610181	1191.25	3920	0.310524	0.689476	MagmaSat	15.8999	Moore et al., 2018
Kamchatka	Klyuchevskoy	C4-4-3	Olivine	90	48.983	0.822506	14.1548	1.66442	6.44266	0.114768	10.2447	11.7255	2.48665	0.506893	2.13278	0.273244	0.828378	1224.93	3960	0.203895	0.796105	MagmaSat	16.0259	Moore et al., 2018
Kamchatka	Klyuchevskoy	C4-4-5	Olivine	89.3	47.559	0.642813	13.4707	1.90355	7.46136	0.113438	11.2064	11.4288	2.00406	0.378125	2.97774	0.329725	0.848421	1229.64	4700	0.316911	0.683089	MagmaSat	18.3571	Moore et al., 2018
Kamchatka	Klyuchevskoy	C10-1-1	Olivine	90.9	47.7559	0.874137	15.3494	1.33456	4.47389	0.104064	7.89421	11.1453	2.82013	0.541133	4.65166	0.390448	0.726102	1132.98	5910	0.442313	0.557687	MagmaSat	22.1651	Moore et al., 2018
Kamchatka	Klyuchevskoy	C10-1-2	Olivine	87.7	46.4147	1.10255	15.1965	1.87258	6.30186	0.156022	7.95508	9.92298	2.8916	0.686496	4.78467	0.399936	0.652977	1137.9	5830	0.485444	0.514556	MagmaSat	21.9134	Moore et al., 2018
Kamchatka	Klyuchevskoy	C10-1-3	Olivine	86.6	49.4649	0.885225	15.0172	1.80354	5.8647	0.136999	6.96286	9.63209	2.92967	0.558535	4.87927	0.417426	0.641404	1126.37	6480	0.44656	0.55344	MagmaSat	23.9573	Moore et al., 2018
Kamchatka	Klyuchevskoy	C10-2	Olivine	87.3	48.221	0.787703	13.7796	1.81144	5.95984	0.168043	7.48898	12.1621	2.38412	0.451617	4.87326	0.401414	0.882622	1123.36	6010	0.467851	0.532149	MagmaSat	22.4796	Moore et al., 2018
Kamchatka	Klyuchevskoy	C10-2-2a	Olivine	89.7	48.742	0.932806	15.4742	1.42363	4.78647	0.11401	7.26352	11.3595	3.23373	0.580413	4.05252	0.374366	0.734092	1131.33	5450	0.380932	0.619068	MagmaSat	20.7179	Moore et al., 2018
Kamchatka	Klyuchevskoy	C10-2-4	Olivine	88.6	49.073	0.815587	13.396	1.72209	5.99211	0.142728	8.74442	10.7046	2.28364	0.428183	4.9445	0.375272	0.799087	1158.85	5990	0.489052	0.510948	MagmaSat	22.4167	Moore et al., 2018
Ref
Mironov N, Portnyagin M, Botcharnikov R, Gurenko A, Hoernle K, Holtz F. Quantification of the CO2 budget and H2O–CO2 systematics in subduction-zone magmas through the experimental hydration of melt inclusions in olivine at high H2O pressure. Earth and Planetary Science Letters 425, 1-11 (2015).
Portnyagin M, et al. Dehydration of melt inclusions in olivine and implications for the origin of silica-undersaturated island-arc melts. Earth and Planetary Science Letters 517, 95-105 (2019).
Moore LR, Mironov N, Portnyagin M, Gazel E, Bodnar RJ. Volatile contents of primitive bubble-bearing melt inclusions from Klyuchevskoy volcano, Kamchatka: Comparison of volatile contents determined by mass-balance versus experimental homogenization. Journal of Volcanology and Geothermal Research, (2018).

## Sheet: Table S6
Supplementary Table S6. Compilation of experimental partial melts from CO2-poor and CO2-bearing peridotites
	Patial melt	Sample	P (Gpa)	T (℃)	strating ADD Bulk H2O wt.%	strating ADD Bulk CO2 wt.%	starting XCO2	Starting Rock	Melt % mass balance	Melt % corr	wt.% SiO2	wt.% TiO2	wt.% Al2O3	wt.% Fe2O3	wt.% FeO	wt.% FeOt	wt.% MnO	wt.% MgO	wt.% CaO	wt.% Na2O	wt.% K2O	wt.% P2O5	wt.% Cr2O3	wt.% NiO	wt.% H2O by diffusion	wt.% H2O by mass balace	wt.% CO2	CaO/Al2O3	Ref
	glass	B500	2	1200	3.5		0	peridototie	0.071		50		8.3			9.5	0.25	17	11	2	0.6							1.3253	Lara and Dascupta, (2022)
	glass	B492	2	1200	3.5		0.04	peridototie	0.064		48		8.2			8	0.25	20	12	2.4	1							1.46341	Lara and Dascupta, (2022)
	glass	B494	2	1200	3.5		0.1	peridototie	0.033		37		12			6.9	0.3	12	26	2.3	1.9							2.16667	Lara and Dascupta, (2022)
	glass	B498	2	1200	3.5		0.17	peridototie	0.02		27		3.9			5.9	0.2	20	40	3	0.9							10.2564	Lara and Dascupta, (2022)
	glass	B499	3	1200	3.5		0	peridototie	0.043		45		11.8			7.6	0.34	18	13	2.8	1.3							1.10169	Lara and Dascupta, (2022)
	glass	B491	3	1200	3.5		0.04	peridototie	0.063		46		11			10	0.23	18	12	2	1							1.09091	Lara and Dascupta, (2022)
	glass	B495	3	1200	3.5		0.1	peridototie	0.046		47		9.7			6.2	0.32	16	15	4.5	1							1.54639	Lara and Dascupta, (2022)
	glass	B497	3	1200	3.5		0.17	peridototie	0.043		36		7			8.1	0.19	22	23	2	1.2							3.28571	Lara and Dascupta, (2022)
	glass	MA271	4	1200	3.5		0	peridototie	0.028		46		14.9			6.9	0.2	17	9	4.3	0.9							0.604027	Lara and Dascupta, (2022)
	glass	MA268	4	1200	3.5		0.04	peridototie	0.05		51		9			8	0.9	17	7	4	2							0.777778	Lara and Dascupta, (2022)
	glass	MA269	4	1200	3.5		0.1	peridototie	0.075		48.9		7.1			8	0.24	22.1	10.3	3.2	0.26							1.4507	Lara and Dascupta, (2022)
	glass	MA270	4	1200	3.5		0.17	peridototie	0.033		37		6			9	0.3	15	27	4	1							4.5	Lara and Dascupta, (2022)
	melt	B	3	1100	0.22	1.86		CPL carbonated phlogopite lherzolite			2.57	0.72	0.38			4.54	0.16	15.12	21.6	4.93	7.01		0			2.66	40.31	56.8421	Thibault et al. (1992)
	melt	D	3	1225	0.23			PLZ phlogopite lherzolite			47.96	1.68	10.97			5.66	0.15	13.21	11.59	1.04	5.4		0.29			2.05		1.05652	Thibault et al. (1992)
	melt	MP	5	1180	0.4	1.99		MP MORB pyrolite	0.078	0.078	5.19	0.08	1.43			5.92		16.07	23.85	0.36	0.37							16.6783	Foley et al. (2009)
	melt	HP	5	1180	0.63	3.21		HP Hawaiian pyrolite minus 40% olivine	0.141	0.101	7.46	0.91	1.41			7.28		15.25	23.97	1.69	0.54							17	Foley et al. (2009)
	melt	HPK	5	1180	0.63	3.17		HPK Potassium-enriched Hawaiian pyrolite minus 40% olivine	0.161	0.115	13.15	2.6	1.93			5.54		16.03	10.78	3.3	13.74							5.58549	Foley et al. (2009)
	melt	HPK	4	1090	0.63	3.17		HPK Potassium-enriched Hawaiian pyrolite minus 41% olivine	0.165	0.118	10.17	3.72	0.57			8.24		14.84	13.5	3.64	7.63							23.6842	Foley et al. (2009)
	melt	HPK	4	1150	0.63	3.17		HPK Potassium-enriched Hawaiian pyrolite minus 42% olivine	0.247	0.176	21.43	1.08	1.24			6.96		17.17	8.42	1.7	5.39							6.79032	Foley et al. (2009)
	melt	HPK	5	1090	0.63	3.17		HPK Potassium-enriched Hawaiian pyrolite minus 43% olivine	0.08	0.057	2.62	0.29	0.62			6.89		18.59	21.98	0.48	2.32							35.4516	Foley et al. (2009)
	melt	HPK	5	1150	0.63	3.17		HPK Potassium-enriched Hawaiian pyrolite minus 44% olivine	0.129	0.092	7.73	0.19	1.18			4.82		19.31	13.69	1.52	5.02							11.6017	Foley et al. (2009)
	melt	HPK	5	1210	0.63	3.17		HPK Potassium-enriched Hawaiian pyrolite minus 45% olivine	0.161	0.115	24.23	2.23	2.87			6.46		17.25	9.87	1.15	7.31							3.43902	Foley et al. (2009)
	melt	HPK	5	1240	0.63	3.17		HPK Potassium-enriched Hawaiian pyrolite minus 46% olivine	0.228	0.163	32.13	0.57	6.82			4.63		16.04	6.02	1.7	4.95							0.882698	Foley et al. (2009)
	melt	HPK	5	1270	0.63	3.17		HPK Potassium-enriched Hawaiian pyrolite minus 47% olivine	0.385	0.275	31.23	1.66	9.45			6.03		16.34	2.92	1.01	3.55							0.308995	Foley et al. (2009)
	melt	HPK	6	1170	0.63	3.17		HPK Potassium-enriched Hawaiian pyrolite minus 48% olivine	0.474	0.339	21.51	1.39	0.67			5.84		14.95	7.84	0.9	4.53							11.7015	Foley et al. (2009)
	melt	HPK	6	1230	0.63	3.17		HPK Potassium-enriched Hawaiian pyrolite minus 49% olivine	0.372	0.266	26.3	0.38	0.72			3.74		13.63	4.51	0.88	3.18							6.26389	Foley et al. (2009)
	melt	HPK	6	1290	0.63	3.17		HPK Potassium-enriched Hawaiian pyrolite minus 50% olivine	0.364	0.26	33.45	0.31	2.31			3.85		15.7	3.1	0.86	4.49							1.34199	Foley et al. (2009)
	equlibrium melt		4	900	9, 10	1		H2O–CO2-bearing CLZ1 lherzolite			21.21	0.85	5.49			3.06		9.98	7.93	1.34	0.01		0.04		49.49		0.59	1.44444	Dvir and Kessel, (2017)
	equlibrium melt		4	1000	11, 10	1		H2O–CO2-bearing CLZ1 lherzolite	0.27		25.86	0.79	6.67			4.13		12.32	7.92	0.92	0.04		0.08		38.01		3.26	1.18741	Dvir and Kessel, (2017)
	equlibrium melt		4	1100	10, 11	1		H2O–CO2-bearing CLZ1 lherzolite	0.34		29.25	0.51	7.05			5.01		13.99	7.06	0.74	0.04		0.36		32.26		3.72	1.00142	Dvir and Kessel, (2017)
	equlibrium melt		5	900	11, 10	1		H2O–CO2-bearing CLZ1 lherzolite			21.45	0.55	5.36			3.1		9.44	7.39	0.87	0.03		0.03		51.23		0.53	1.37873	Dvir and Kessel, (2017)
	equlibrium melt		5	1000	10, 10	1		H2O–CO2-bearing CLZ1 lherzolite			26.86	0.61	6.68			3.64		11.66	6.78	0.88	0.02		0.05		42.29		0.52	1.01497	Dvir and Kessel, (2017)
	equlibrium melt		5	1100	10, 9	1		H2O–CO2-bearing CLZ1 lherzolite	0.27		29.2	0.53	6.65			4.6		14.15	6.37	0.62	0.03		0.09		34.25		3.5	0.957895	Dvir and Kessel, (2017)
	equlibrium melt		6	900	11, 11	1		H2O–CO2-bearing CLZ1 lherzolite			18.48	0.51	5.03			3.41		7.87	5.8	0.88	0.02		0.02		57.36		0.62	1.15308	Dvir and Kessel, (2017)
	equlibrium melt		6	1000	11, 11	1		H2O–CO2-bearing CLZ1 lherzolite			25.66	0.44	7.13			4.31		11.36	6.07	0.85	0.03		0.06		43.58		0.52	0.851332	Dvir and Kessel, (2017)
	equlibrium melt		6	1100	9, 10	1		H2O–CO2-bearing CLZ1 lherzolite	0.29		30.24	0.35	7.53			5.43		14.17	5.48	0.54	0.03		0.1		32.89		3.25	0.727756	Dvir and Kessel, (2017)
	equlibrium melt		4	900	11, 11	5		H2O–CO2-bearing CLZ1 lherzolite	0.25		14.04	0.84	5.01			5.63		8.91	13.04	1.42	0.03		0.05		38.19		12.83	2.60279	Dvir and Kessel, (2017)
	equlibrium melt		4	1000	9, 11	5		H2O–CO2-bearing CLZ5 lherzolite	0.26		18.19	0.68	5.18			6.18		10.84	11.88	0.93	0.04		0.04		32.66		13.37	2.29344	Dvir and Kessel, (2017)
	equlibrium melt		4	1100	10, 10	5		H2O–CO2-bearing CLZ5 lherzolite	0.38		23.75	0.54	5.65			6.68		13.2	7	0.55	0.05		0.05		28.7		13.63	1.23894	Dvir and Kessel, (2017)
	equlibrium melt		5	900	11, 10	5		H2O–CO2-bearing CLZ5 lherzolite			13.53	0.48	4.69			5.38		10.07	11.24	0.95	0.02		0.06		48.22		5.35	2.39659	Dvir and Kessel, (2017)
	equlibrium melt		5	1000	10, 11	5		H2O–CO2-bearing CLZ5 lherzolite	0.31		18.81	0.6	5.14			5.83		11.61	10.32	0.77	0.02		0.06		34.12		12.71	2.00778	Dvir and Kessel, (2017)
	equlibrium melt		5	1100	10, 10	5		H2O–CO2-bearing CLZ5 lherzolite	0.35		24.68	0.49	5.83			7.22		13.61	7.71	0.55	0.03		0.05		27.69		12.13	1.32247	Dvir and Kessel, (2017)
	equlibrium melt		6	900	10, 12	5		H2O–CO2-bearing CLZ5 lherzolite			13.11	0.38	4.69			4.73		8.15	9.99	0.67	0.02		0.05		58.2		4.82	2.13006	Dvir and Kessel, (2017)
	equlibrium melt		6	1000	10, 10	5		H2O–CO2-bearing CLZ5 lherzolite	0.31		18.45	0.51	5.57			5.95		10.34	10.18	0.73	0.03		0.05		34.87		13.31	1.82765	Dvir and Kessel, (2017)
	equlibrium melt		6	1100	10, 10	5		H2O–CO2-bearing CLZ5 lherzolite	0.36		25.6	0.45	6.05			7		13.91	7.4	0.5	0.04		0.06		26.32		12.66	1.22314	Dvir and Kessel, (2017)
	Melt	Run M-152	6	1200				SC1 10%			8.9	0.4	1.2			5.8	0.25	18.3	23.1	0.42	0.05	0.18	0.1	0.02				19.25	Brey et al. (2009)
	Melt	Run M-157	6	1300				SC1 10%			14.9	0.38	1.02			10	0.28	24.4	13.1	0.48	0.07	0.12	0.15	0.06				12.8431	Brey et al. (2009)
	Melt	Run M-151	6	1400				SC1 10%			14.2	0.32	1.08			12.6	0.36	23.1	12.6	0.46	0.05	0.35	0.07	0.05				11.6667	Brey et al. (2009)
	Melt	Run M-241	10	1200				SC1 10%			5.7	0.3	0.55			2.1	0.27	19.2	27.6	0.46	0.06	0.27	0.04	0.02				50.1818	Brey et al. (2009)
	Melt	Run M-200	10	1400				SC1 10%			9.7	0.33	0.55			12.6	0.38	20.1	16.9	0.36	0.07	0.09	0.08	0.04				30.7273	Brey et al. (2009)
	Melt	Run M-160	10	1500				SC1 10%			16	0.31	0.64			10.9	0.38	26.8	11.3	0.31	0.05	0.12	0.18	0.07				17.6562	Brey et al. (2009)
	Melt	Run M-161	10	1600				SC1 10%			21.4	0.23	0.54			16.8	0.41	29.7	6.1	0.24	0.01	0.05	0.14	0.11				11.2963	Brey et al. (2009)
	Melt	Run M-217	6	1200				SC1 6%CaCO3 CaCO3 4% CaF2	0.159		2.7	0.04	0.1			3.2	0.12	18.3	26.8	1.19	0.14	0.18	–	0.02				268	Brey et al. (2009)
	Melt	Run M-202	6	1300				SC1 6%CaCO3 CaCO3 4% CaF2	0.151		6.2	0.14	0.24			1.65	0.14	26.8	27.2	0.8	0.21	0.08	0.01	–				113.333	Brey et al. (2009)
	Melt	Run M-164	6	1400				SC1 6%CaCO3 CaCO3 4% CaF2	0.137		12.6	0.24	0.54			5.9	0.18	25.3	22.8	0.33	0.05	0.13	0.03	0.02				42.2222	Brey et al. (2009)
	Melt	Run M-205	6	1500				SC1 6%CaCO3 CaCO3 4% CaF2	0.134		20.7	0.23	0.76			7.6	0.23	27.3	20.2	0.24	0.03	0.12	0.04	0.04				26.5789	Brey et al. (2009)
	Melt	Run M-242	10	1200				SC1 6%CaCO3 CaCO3 4% CaF2	0.159		1.3	0.03	0.07			2.02	0.1	19.2	41.8	1	0.13	0.06	–	0.03				597.143	Brey et al. (2009)
	Melt	Run M-207	10	1400				SC1 6%CaCO3 CaCO3 4% CaF2	0.141		8.3	0.25	0.12			3.81	0.19	27.5	26.7	0.56	0.08	0.05	–	0.03				222.5	Brey et al. (2009)
	Melt	Run M-209	10	1500				SC1 6%CaCO3 CaCO3 4% CaF2	0.168		12.3	0.22	0.18			4.11	0.18	28.2	24.2	0.4	0.05	0.05	–	0.04				134.444	Brey et al. (2009)
	Melt	B516	2	1350			0.04	Depleted Peridotite	0.12		50	-	4.4			11.8	0.23	24	8	1	0.5		-					1.81818	Lara and Dascupta, (2023)
	Melt	B505	2	1350			0.11	Depleted Peridotite	0.071		47	-	4.9			11.2	0.3	20	13	1.9	0.5		-					2.65306	Lara and Dascupta, (2023)
	Melt	B512	2	1350			0.17	Depleted Peridotite	0.071		44	-	4.1			12	0.15	23	13	1.7	0.6		-					3.17073	Lara and Dascupta, (2023)
	Melt	B534	3	1350			0.04	Depleted Peridotite	0.22		50	-	4			12.2	0.25	28	4	1.2	0.7		-					1	Lara and Dascupta, (2023)
	Melt	B517	3	1350			0.11	Depleted Peridotite	0.12		44	-	5			13	0.39	27	10	1.5	0.5		-					2	Lara and Dascupta, (2023)
	Melt	B536	3	1350			0.17	Depleted Peridotite	0.103		44	-	4.2			14.3	0.18	26	9	1.8	0.7		-					2.14286	Lara and Dascupta, (2023)
	Melt	B545	2	1350			0.04	Fertile Peridotite	0.41		49	0.23	9			10.4	0.15	22	8	0.8	0.2		0.39					0.888889	Lara and Dascupta, (2023)
	Melt	B513	2	1350			0.17	Fertile Peridotite	0.192		42.8	0.5	10.3			10	0.17	18	16.4	1.28	0.03		0.16					1.59223	Lara and Dascupta, (2023)
	Melt	B530	3	1350			0.04	Fertile Peridotite	0.288		44	0.3	10.4			10.8	0.16	21.6	11.1	1.1	0.2		0.34					1.06731	Lara and Dascupta, (2023)
	Melt	B515	3	1350			0.17	Fertile Peridotite	0.241		38	0.37	8.6			11.6	0.2	26	14.2	0.9	0.06		0.25					1.65116	Lara and Dascupta, (2023)
	Silicate from basalt	137	5	1150				altered basalt composition +10.1wt.% calcite+0.12 wt.%water			63.67		13.42			2.54		0.68	6.19	0.88	1.15						n.a.	0.461252	Hammouda, (2003)
	Carbonate	220	6	1250				altered basalt composition +10.1wt.% calcite+0.12 wt.%water			0.78		0.38			7.48		3.74	44.19	0.08	0						43.34	116.289	Hammouda, (2003)
	Silicate from basalt	221	6	1300				altered basalt composition +10.1wt.% calcite+0.12 wt.%water			45.16		12.73			7.79		3.61	16.57	1.88	0.04						n.a.	1.30165	Hammouda, (2003)
	Carbonate	221	6	1300				altered basalt composition +10.1wt.% calcite+0.12 wt.%water			10.78		3.35			8.64		4.78	34.53	0.31	0.02						37.59	10.3075	Hammouda, (2003)
	Carbonate	222	6.5	1300				altered basalt composition +10.1wt.% calcite+0.12 wt.%water			9.7		2.53			8.56		4.74	34.85	1.82	0.03						37.76	13.7747	Hammouda, (2003)
	Carbonate	161	7	1000				altered basalt composition +10.1wt.% calcite+0.12 wt.%water			0.14		0.34			4.34		4.11	46.51	0.81	0.13						43.63	136.794	Hammouda, (2003)
	Carbonate	117	7	1300				altered basalt composition +10.1wt.% calcite+0.12 wt.%water			0.38		0.28			6.81		6.1	41.96	0.68	0.05						43.74	149.857	Hammouda, (2003)
	Carbonate	147	10	1100				altered basalt composition +10.1wt.% calcite+0.12 wt.%water			0.21		0.57			4.53		4.06	46.47	0.49	0.01						43.67	81.5263	Hammouda, (2003)
	Carbonate	143	10	1200				altered basalt composition +10.1wt.% calcite+0.12 wt.%water			0.18		0.57			7.16		5.08	42.96	0.38	0.05						43.63	75.3684	Hammouda, (2003)
	Carbo melt	0.00461538	6	1300				altered basalt composition +10.1wt.% calcite+0.12 wt.%water			10.855		3.373			8.697		4.808	34.756	0.313	0.016						37.8421	10.3042	Hammouda, (2003)
	Silicate from basalt	6/1300	6	1300				altered basalt composition +10.1wt.% calcite+0.12 wt.%water			45.156		12.727			7.786		3.611	16.575	1.884	0.043						13	1.30235	Hammouda, (2003)
	Calcite	6.5/950	6.5	950				altered basalt composition +10.1wt.% calcite+0.12 wt.%water			0.0604377		0.0643369			4.64298		13.3099	36.1261	0.0877321	0.031						45.7084	561.515	Hammouda, (2003)
	Carbo melt	6.5/1000	6.5	1000				altered basalt composition +10.1wt.% calcite+0.12 wt.%water			0.0592889		0.0490986			4.22156		8.18835	42.5481	0.0314972	0						44.9021	866.585	Hammouda, (2003)
	Carbo melt	6.5/1100	6.5	1100				altered basalt composition +10.1wt.% calcite+0.12 wt.%water			0.6672		0.514			4.1275		4.201	46.696	0.0444	0						43.75	90.8482	Hammouda, (2003)
	Carbo melt	6.5/1200	6.5	1200				altered basalt composition +10.1wt.% calcite+0.12 wt.%water			0.133656		0.172725			8.40596		6.02996	41.0798	0.178894	0.039984						43.959	237.833	Hammouda, (2003)
	Carbo melt	6.5/1300	6.5	1300				altered basalt composition +10.1wt.% calcite+0.12 wt.%water			9.25459		2.57953			8.28317		4.69946	35.4092	1.58252	0.206772						37.9827	13.727	Hammouda, (2003)
	Carbo melt	7/1000	7	1000				altered basalt composition +10.1wt.% calcite+0.12 wt.%water			0.140638		0.33979			4.3526		4.11444	46.6077	0.81098	0.12832						43.5055	137.166	Hammouda, (2003)
	Carbo melt	7/1100	7	1100				altered basalt composition +10.1wt.% calcite+0.12 wt.%water			0		0.1227			4.3635		8.0234	42.565	0.1016	0						44.82	346.903	Hammouda, (2003)
	Carbo melt	7/1300	7	1300				altered basalt composition +10.1wt.% calcite+0.12 wt.%water			0.17		0.29			6.7		4.91	42.07	0.65	0.039						45.18	145.069	Hammouda, (2003)
	Carbo melt	10/1000	10	1000				altered basalt composition +10.1wt.% calcite+0.12 wt.%water			5.30519		0.4984			4.85441		2.40007	43.1337	0.171671	0						43.6365	86.5444	Hammouda, (2003)
	Carbo melt	10/1100	10	1100				altered basalt composition +10.1wt.% calcite+0.12 wt.%water			0.47		0.62			5.09		4.8	44.77	0.44	0						43.82	72.2097	Hammouda, (2003)
	Carbo melt	10/1200	10	1200				altered basalt composition +10.1wt.% calcite+0.12 wt.%water			0.377578		0.597567			6.71602		5.75357	40.9794	0.22422	0						45.3517	68.577	Hammouda, (2003)
	Silicate from basalt	5/1150	5	1150				altered basalt composition +10.1wt.% calcite+0.12 wt.%water			63.67		13.42			2.54		0.68	6.19	0.88	1.15						n.a.	0.461252	Hammouda, (2003)
	Carbo melt	6/1250	6	1250				altered basalt composition +10.1wt.% calcite+0.12 wt.%water			0.781		0.38			7.49		3.751	44.264	0.085	0.001						43.4094	116.484	Hammouda, (2003)
	carbonate-rich melt	A382	3	1075				carbonatedeclogite	0.1		1.88	0.02	0.76			10	0.22	12.2	31.16	0.89	0.07		n.a.				41	41	Dasgupta et al. (2006)
	carbonate-rich melt	A388	3	1080				carbonatedeclogite	0.11		1.97	0.01	0.85			9	0.83	11.07	31.18	0.91	0.18		0.03				36.6824	36.6824	Dasgupta et al. (2006)
	carbonate-rich melt	A380	3	1100				carbonatedeclogite	0.09		2.21	0.01	0.79			8.81	0.72	10.07	31.28	1.81	0.18		0.02				39.5949	39.5949	Dasgupta et al. (2006)
	carbonate-rich melt	A373	3	1125				carbonatedeclogite	0.09		2.31	0.07	0.81			8.99	0.47	11.04	31.28	1.57	0.17		0.07				38.6173	38.6173	Dasgupta et al. (2006)
	carbonate-rich melt	A375	3	1150				carbonatedeclogite	0.09		2.57	0.04	0.87			9.57	0.04	10.6	32.49	1.56	0.08		0.02				37.3448	37.3448	Dasgupta et al. (2006)
	carbonate-rich melt	A381	3	1175				carbonatedeclogite	0.1		2.93	0.08	0.92			9.73	0.03	11.09	32.44	1.7	0		0.04				35.2609	35.2609	Dasgupta et al. (2006)
	carbonate-rich melt	A410	3	1225				carbonatedeclogite	0.11		4.01	0.3	1.2			12	0.1	10	30	1.22	0.09		n.a.				25	25	Dasgupta et al. (2006)
	carbonate-rich melt	A413	3	1275				carbonatedeclogite	0.1		4.45	0.42	1.3			12	0.52	8	30	0.54	0.04		n.a.				23.0769	23.0769	Dasgupta et al. (2006)
	carbonate-rich melt	A418	3	1315				carbonatedeclogite	0.09		5	0.51	1.37			14	0.45	6.65	30	0.13	0.05		n.a.				21.8978	21.8978	Dasgupta et al. (2006)
	carbonate-rich melt	A423	3	1350				carbonatedeclogite	0.06		4.85	0.61	1.83			15.81	0	6.88	29	0.14	0.03		n.a.				15.847	15.847	Dasgupta et al. (2006)
	carbonate-rich melt	A429	3	1375				carbonatedeclogite	0.03		4.88	0.78	2.24			16.01	0.26	5.99	26	0.27	0.07		n.a.				11.6071	11.6071	Dasgupta et al. (2006)
	melt	A410	3	1225				carbonatedeclogite	0.04		33.8	19.4	2.43			25.6	0.12	8.2	5.1	5.1	0.2		0.05					2.09877	Dasgupta et al. (2006)
	melt	A413	3	1275				carbonatedeclogite	0.12		37.7	13.6	4.8			21	0.4	10.5	8.4	3.5	0.03		0.07					1.75	Dasgupta et al. (2006)
	melt	A418	3	1315				carbonatedeclogite	0.2		40.9	8.6	6.27			18.3	0.4	10.8	11.8	2.9	0.03		n.a.					1.88198	Dasgupta et al. (2006)
	melt	A423	3	1350				carbonatedeclogite	0.38		41.9	5.4	8.03			16.5	0.15	11.6	14	2.4	0.02		n.a.					1.74346	Dasgupta et al. (2006)
	melt	A429	3	1375				carbonatedeclogite	0.63		42.9	3.6	9.16			15.1	0.2	12.3	14.6	2	0.14		n.a.					1.59389	Dasgupta et al. (2006)
	melt	A426	3	1400				carbonatedeclogite	0.89		43.3	2.6	10.09			13.8	0.16	13.54	14.7	1.75	0.13		n.a.					1.45689	Dasgupta et al. (2006)
	carbonate-rich melt	A471	3	1300		2.5		peridotite+2.5wt.%CO2	0.06		5.3	0.91	2.2			7.8	0.17	13.4	25.3	1.08	0.05		n.a.				—	11.5	Dasgupta et al. (2007)
	carbonate-rich melt	A472	3	1325		2.5		peridotite+2.5wt.%CO2	0.062		7	1.21	2.7			7.5	0.17	14	25.3	0.98	0.05		n.a.				—	9.37037	Dasgupta et al. (2007)
	carbonated silica melt	A482	3	1350		2.5		peridotite+2.5wt.%CO2	0.101		28.4	1.61	9.8			11.9	0.23	19.7	25.7	2.64	0.07		0.11				24.9	2.62245	Dasgupta et al. (2007)
	melt	A500	3	1360		2.5		peridotite+2.5wt.%CO2	0.131		32.1	1.44	8.8			11.9	0.22	19.3	24	2.3	0.07		n.a.				18.6	2.72727	Dasgupta et al. (2007)
	melt	A483	3	1375		2.5		peridotite+2.5wt.%CO2	0.137		32	1.42	9.2			11.9	0.22	19.3	23.9	1.87	0.07		n.a.				18.2	2.59783	Dasgupta et al. (2007)
	melt	A486	3	1400		2.5		peridotite+2.5wt.%CO2	0.155		34.5	1.25	9.5			11.6	0.2	19.6	21.7	1.6	0.05		0.09				17	2.28421	Dasgupta et al. (2007)
	melt	A488	3	1425		2.5		peridotite+2.5wt.%CO2	0.177		35.9	1.15	10.2			11.4	0.17	19.7	20.1	1.4	0.03		0.13				14.6	1.97059	Dasgupta et al. (2007)
	melt	A490	3	1450		2.5		peridotite+2.5wt.%CO2	0.225		37.3	0.95	12.3			10.9	0.24	21.3	15.7	1.1	0.1		0.14				11.1	1.27642	Dasgupta et al. (2007)
	melt	A491	3	1475		2.5		peridotite+2.5wt.%CO2	0.258		40.2	0.9	10.8			11.2	0.21	22.2	13.3	0.9	0.09		0.18				9.5	1.23148	Dasgupta et al. (2007)
	melt	A492	3	1500		2.5		peridotite+2.5wt.%CO2	0.323		41.3	0.82	9.9			11.2	0.22	24.4	11.2	0.83	0.07		0.22				7.9	1.13131	Dasgupta et al. (2007)
	melt	A494	3	1525		2.5		peridotite+2.5wt.%CO2	0.341		42.6	0.75	9.4			10.56	0.22	24.22	11.05	0.83	0.1		0.26				7.5	1.17553	Dasgupta et al. (2007)
	melt	A493	3	1550		2.5		peridotite+2.5wt.%CO2	0.403		45.2	0.51	8.85			10.54	0.2	25	8.7	0.62	0.05		0.32				6	0.983051	Dasgupta et al. (2007)
	melt	A495	3	1575		2.5		peridotite+2.5wt.%CO2	0.498		45.7	0.48	7.29			10.15	0.21	28.1	7.12	0.57	0.04		0.38				5.1	0.97668	Dasgupta et al. (2007)
	melt	A496	3	1600		2.5		peridotite+2.5wt.%CO2	0.51		45.62	0.49	6.83			9.77	0.21	28.84	7.25	0.61	0.03		0.34				5	1.06149	Dasgupta et al. (2007)
	melt	A509	3	1350		1		peridotite+1wt.%CO2	0.056		42.4	1.86	10			10.4	0.17	15.3	17	2.73	0.05		0.16				15.8	1.7	Dasgupta et al. (2007)
	melt	A510	3	1400		1		peridotite+1wt.%CO2	0.078		43.8	1.36	11			10.7	0.13	16.3	14.3	2.11	0.11		0.16				13.1	1.3	Dasgupta et al. (2007)
	melt	A520	3	1425		1		peridotite+1wt.%CO2	0.192		43.4	1.09	12.5			9.9	0.2	16.1	15.1	1.28	0.02		0.36				5.1	1.208	Dasgupta et al. (2007)
	melt	A512	3	1450		1		peridotite+1wt.%CO2	0.207		44	1.06	12.7			9.5	0.2	16	15	1.19	0.06		0.34				4.8	1.1811	Dasgupta et al. (2007)
	melt	A514	3	1500		1		peridotite+1wt.%CO2	0.271		45.9	0.98	10.5			9.4	0.18	18.9	12.7	1.1	0.06		0.31				3.6	1.20952	Dasgupta et al. (2007)
	melt	A515	3	1550		1		peridotite+1wt.%CO2	0.32		47.5	0.66	8.8			9	0.22	21.9	10.8	0.81	0.05		0.3				3.1	1.22727	Dasgupta et al. (2007)
	melt	A516	3	1600		1		peridotite+1wt.%CO2	0.472		48.2	0.51	7.55			8.38	0.18	26.5	7.8	0.7	0.04		0.29				2.1	1.03311	Dasgupta et al. (2007)
	melt	M384	3.5	1350	1.5			Spinel lherzolites	0.18		42.11	0.81	10.42			10.32	0.2	22.3	12.31	0.77	0.47		0.29			8.1		1.18138	Tenner et al. (2012)
	melt	M388	3.5	1375	1.5			Spinel lherzolites	0.22		48.55	0.66	10.31			7.3	0.16	18.93	13.02	0.68	0.06		0.33			6.7		1.26285	Tenner et al. (2012)
	melt	M387	3.5	1425	1.5			Spinel lherzolites	0.28		45.8	0.55	9.49			8.62	0.19	22.77	11.29	0.84	0.08		0.37			5.3		1.18967	Tenner et al. (2012)
	melt	M382	3.5	1450	1.5			Spinel lherzolites	0.3		44.89	0.55	9.31			9.37	0.18	24.24	9.78	1.2	0.1		0.37			4.9		1.05048	Tenner et al. (2012)
	melt	M418	3.5	1450	1.5			Spinel lherzolites	0.33		46.04	0.5	8.79			9.26	0.18	24.41	9.49	0.9	0.08		0.36			4.5		1.07964	Tenner et al. (2012)
	melt	M399	3.5	1275	2.5			Spinel lherzolites	0.2		42.27	0.71	10.68			9.76	0.17	21.91	12.88	1.32	0.06		0.25			12.3		1.20599	Tenner et al. (2012)
	melt	M396	3.5	1300	2.5			Spinel lherzolites	0.21		43.34	0.63	9.82			10.58	0.16	22.43	12.38	0.19	0.18		0.28			11.7		1.26069	Tenner et al. (2012)
	melt	M402	3.5	1325	2.5			Spinel lherzolites	0.25		43.47	0.5	9.17			8.71	0.15	25.76	11.39	0.44	0.05		0.36			9.9		1.24209	Tenner et al. (2012)
	melt	M412	3.5	1325	2.5			Spinel lherzolites	0.26		44	0.52	9.7			9.44	0.18	23.87	10.82	1	0.1		0.36			9.5		1.11546	Tenner et al. (2012)
	melt	M395	3.5	1350	2.5			Spinel lherzolites	0.27		43.33	0.52	9.7			10.29	0.17	24.64	10.43	0.51	0.06		0.34			9.2		1.07526	Tenner et al. (2012)
	melt	M411	3.5	1350	2.5			Spinel lherzolites	0.28		44.58	0.5	9.18			8.09	0.18	25.98	10.44	0.63	0.08		0.36			8.8		1.13725	Tenner et al. (2012)
	melt	M417	3.5	1350	2.5			Spinel lherzolites	0.31		45.28	0.51	9.35			10.68	0.17	24.47	8.21	0.82	0.15		0.35			8		0.878075	Tenner et al. (2012)
	melt	M423	3.5	1200	5			Spinel lherzolites	0.21		42.28	0.59	10.64			8.22	0.16	24.07	13.37	0.17	0.22		0.28			23.4		1.25658	Tenner et al. (2012)
	melt	M422	3.5	1225	5			Spinel lherzolites	0.26		41.57	0.57	9.57			9.02	0.15	27.35	11.24	0.07	0.11		0.36			19		1.1745	Tenner et al. (2012)
	melt	M426	3.5	1250	5			Spinel lherzolites	0.25		43.24	0.49	9.78			7.59	0.17	25.91	11.79	0.59	0.08		0.35			19.7		1.20552	Tenner et al. (2012)
	melt	M434	3.5	1275	5			Spinel lherzolites	0.3		44.38	0.47	9.36			9.12	0.18	26.29	9.11	0.69	0.04		0.37			16.5		0.973291	Tenner et al. (2012)
	melt	B303	1.2	1345	0.71			peridototie and basalt	0.61		47.5	0.66	17.82			8.1	0.1	11.8	10.98	2.17	0.08	0.12	0.17					0.616162	Gaetani and Grove, (1998)
	melt	B292	1.2	1330	-			peridototie and basalt	0.595		48.04	0.68	18.3			8.3	0.16	11.16	10.57	2.5	0.12	0.11	0.13					0.577596	Gaetani and Grove, (1998)
	melt	B287	1.2	1315	0.98			peridototie and basalt	0.586		46.9	0.66	17.9			8.41	0.12	11.41	-	-	0.12	0.13	0.07					#VALUE!	Gaetani and Grove, (1998)
	melt	B394	1.6	1370	-			peridototie and basalt	0.641		46.3	0.6	17.08			8.62	-	-	10.66	-	-	-	0.18					0.624122	Gaetani and Grove, (1998)
	melt	B302	1.6	1355	-			peridototie and basalt	0.579		46.4	0.68	17.2			8.9	0.11	12.5	-	2.29	-	-	0.13					#VALUE!	Gaetani and Grove, (1998)
	melt	B366	1.6	1230	4.8			peridototie and basalt	0.565		44.2	0.66	16.82			7.77	0.13	11.43	9.86	2.42	0.11	0.16	0.12		4.8			0.586207	Gaetani and Grove, (1998)
	melt	B365	2	1290	5.3			peridototie and basalt	0.606		43.88	0.64	15.41			8.21	0.12	13.36	10.25	-	0.1	-	0.15		5.3			0.665152	Gaetani and Grove, (1998)
	melt	B399	2	1275	6.8			peridototie and basalt	0.636		43.6	0.65	15.3			7.74	0.11	12.7	9.84	2.41	0.12	0.21			6.8			0.643137	Gaetani and Grove, (1998)
	melt	B384	1.2	1200	5.19			peridototie and basalt	0.677		45.9	0.57	15.75			7.39	0.11	10.25	9.47	2.71	0.35	0.21	0.12		6.1			0.60127	Gaetani and Grove, (1998)
	melt	B388	1.2	1200	6.1			peridototie and basalt	0.616		45.8	0.57	15.6			6.65	0.1	10.41	9.55	2.66	0.35	0.15	0.15		6.17			0.612179	Gaetani and Grove, (1998)
	melt	B392	1.2	1170	7.87			peridototie and basalt	0.46		46.2	0.68	18			6.4	0.08	8.48	8.824	3	0.44	0.22	0.06		7.87			0.490222	Gaetani and Grove, (1998)
	melt	B408	1.2	1200	5.6			peridototie and basalt	0.752		46.8	1.2	16.18			6.97	0.1	9.74	8.9	3.06	0.7	0.32	0.12		5.6			0.550062	Gaetani and Grove, (1998)
	melt	B432	1.2	1185	6.2			peridototie and basalt	0.575		45.8	1.26	18.13			6.97	0.17	8.76	8.91	3.59	0.48	-	0.02		6.2			0.491451	Gaetani and Grove, (1998)
	melt	B333	1.2	1245	3.3			peridototie and basalt	0.687		45.8	0.61	17.06			6.87	0.14	11.44	10.91	2.03	0.13	0.09	0.09		3.3			0.639508	Gaetani and Grove, (1998)
	melt	B305	1.2	1230	4.5			peridototie and basalt	0.747		45.05	0.54	15.79			7.09	0.12	12.33	10.33	1.94	0.05	0.16	0.17		4.5			0.654212	Gaetani and Grove, (1998)
	melt	B304	1.2	1215	5.99			peridototie and basalt	0.686		44.63	0.59	17.45			6.85	0.08	10.72	10.72	2.21	0.08	0.16	0.05		5.99			0.614327	Gaetani and Grove, (1998)
	melt	B330	1.2	1200	5.06			peridototie and basalt	0.712		45.1	0.6	17.63			6.92	0.12	10.26	10.22	2.15	0.1	0.1	0.11		5.06			0.579694	Gaetani and Grove, (1998)
	melt	B359	1.6	1260	4.9			peridototie and basalt	0.671		43.9	0.66	17.19			7.36	0.08	11.79	10.4	2.37	0.12	0.15	0.08		4.9			0.605003	Gaetani and Grove, (1998)
	melt	B277	1.6	1255	5			peridototie and basalt	0.666		43.7	0.59	16.8			7.35	0.16	11.92	10.48	2.17	0.09	0.08	0.08		5			0.62381	Gaetani and Grove, (1998)
	melt	B348	1.6	1245	5.3			peridototie and basalt	0.73		43.5	0.64	16.8			7.3	0.15	11.78	10.52	2.26	0.05	0.06	0.09		5.3			0.62619	Gaetani and Grove, (1998)
	melt	B329	1.2	1185	6.26			peridototie and basalt	0.59		44.78	0.63	17.99			7.21	0.14	9.39	9.8	2.31	0.12	0.08	0.08		6.26			0.544747	Gaetani and Grove, (1998)
	glass	D1078	3.5	975				Low-K sediment high H2O+mixing 75% of fine-grained olivine with 25% of slab melt glass			47	0.47	13.1			2	0.03	4.1	1.2	7.6	2				22			0.0916031	Pirard and Hermann, (2015)
	glass	D1064	3.5	1000				Low-K sediment high H2O+mixing 75% of fine-grained olivine with 25% of slab melt glass			37	0.42	10.5			3	0.03	4.3	0.6	9.4	2.3				33			0.0571429	Pirard and Hermann, (2015)
	glass	D1077	3.5	1050				Low-K sediment high H2O+mixing 75% of fine-grained olivine with 25% of slab melt glass			40	0.2	11.7			3.9	0.18	9.3	1.8	5	3.6				24			0.153846	Pirard and Hermann, (2015)
	glass	D891	3.5	1050				High-K sediment low H2O+mixing 75% of fine-grained olivine with 25% of slab melt glass			47	0.79	13			4.4	0.11	9.2	1.7	6.5	3.5				14			0.130769	Pirard and Hermann, (2015)
	glass	D979	3.5	1100				High-K sediment low H2O+mixing 75% of fine-grained olivine with 26% of slab melt glass			55	0.54	13.6			4.8	0.11	7.3	1.1	6.9	2.8				8			0.0808824	Pirard and Hermann, (2015)
	glass	C2933	3.5	950				High-K sediment low H2O+mixing 75% of fine-grained olivine with 27% of slab melt glass			69	0.49	13.8			0.5	0.02	0.5	0.7	3.1	5.5				6			0.0507246	Pirard and Hermann, (2015)
	glass	C2945	3.5	1000				High-K sediment low H2O+mixing 75% of fine-grained olivine with 28% of slab melt glass			69	0.41	13.4			0.4	0.05	0.4	0.2	4.6	5.1				6			0.0149254	Pirard and Hermann, (2015)
	glass	C2951	3.5	1050				High-K sediment low H2O+mixing 75% of fine-grained olivine with 29% of slab melt glass			68		0.47 12.8			1.1	0.05	2.9	1.1	2.9	4.8				6			#VALUE!	Pirard and Hermann, (2015)
	glass	D953	3.5	1100				High-K sediment low H2O+mixing 75% of fine-grained olivine with 25% of slab melt glass			64	0.38	13.8			2.6	0.06	1.7	0.9	4.5	6.5				6			0.0652174	Pirard and Hermann, (2015)
	glass	C3082	3.5	800				Low-K sediment high H2O+mixing 75% of fine-grained olivine with 25% of slab melt glass			64		0.34 10.7			0.3	0.04	0.2	0.2	3.5	4.5				16			#VALUE!	Pirard and Hermann, (2015)
	glass	C3076	3.5	850				Low-K sediment high H2O+mixing 75% of fine-grained olivine with 25% of slab melt glass			66		0.33 11.0				0.5	0.4	0.2	4.2	3.7				14			#VALUE!	Pirard and Hermann, (2015)
	glass	D965	3.5	900				Low-K sediment high H2O+mixing 75% of fine-grained olivine with 25% of slab melt glass			66	0.28	11			0.7	0.02	0.8	0.3	4.7	3				13			0.0272727	Pirard and Hermann, (2015)
	glass	D963	3.5	950				Low-K sediment high H2O+mixing 75% of fine-grained olivine with 25% of slab melt glass			62	0.27	10.9			0.7	0.02	0.9	0.8	5.7	2.7				16			0.0733945	Pirard and Hermann, (2015)
	glass	C507	1	1215	5.95			41 % H&Z + H2O	0.19		53.2	0.73	17			5.1	0.14	7.84	10.28	2.7	0.32	0.01	0.13		3.8			0.604706	Mitchell and Grove, (2015)
	glass	C508	1	1235	5.95			41 % H&Z + H2O	0.23		52.1	0.65	14.9			5.9	0.14	11.1	11	2.2	0.32	0.02	0.21		2.6			0.738255	Mitchell and Grove, (2015)
	glass	C494	1	1235	4.21			29 % H&Z + H2O	0.18		51.2	0.8	17			5.5	0.07	9	10.5	3.2	0.32	0.01	0.08		4			0.617647	Mitchell and Grove, (2015)
	glass	C490	1	1235	4.21			29 % H&Z + H2O	0.27		52.2	0.7	14.5			5.2	0.1	11.7	10.3	2.1	0.25		0.23		3.4			0.710345	Mitchell and Grove, (2015)
	glass	C498	1	1250	1.6			11 % H&Z + H2O	0.28		52.8	0.7	14.2			5.8	0.12	12	10.4	2.3	0.3	0.03	0.29		2.2			0.732394	Mitchell and Grove, (2015)
	glass	C561	1.2	1135	5.95			41 % H&Z + H2O	0.29		51.9	0.5	14			5.8	0.11	9.6	10	2	0.29		0.1	0.01	6.4			0.714286	Mitchell and Grove, (2015)
	glass	C555	1.2	1170	5.95			41 % H&Z + H2O	0.32		53.1	0.52	13.1			5.7	0.1	11.1	9.7	1.8	0.25	0.01	0.1	0.02	5.4			0.740458	Mitchell and Grove, (2015)
	glass	C554	1.2	1185	5.95			41 % H&Z + H2O	0.38		53.4	0.48	11.2			6.4	0.11	13.8	8.3	1.5	0.25	0.02	0.2		4.7			0.741071	Mitchell and Grove, (2015)
	glass	C553	1.2	1215	5.95			41 % H&Z + H2O	0.39		53.9	0.41	10.1			6.4	0.11	14.5	7.5	1.5	0.2	0.03	0.21		6			0.742574	Mitchell and Grove, (2015)
	glass	C559	1.2	1250	5.95			41 % H&Z + H2O	0.44		52	0.36	9.3			7.7	0.12	17.3	7	1	0.2	0.01	0.24	0.01	3.7			0.752688	Mitchell and Grove, (2015)
	glass	C470	1.2	1295	3.19			22 % H&Z + H2O	0.31		52.4	0.6	12.9			6.7	0.09	13	10	2	0.11	0.06	0.4	0.04	1.9			0.775194	Mitchell and Grove, (2015)
	glass	C481	1.2	1335	0			H&Z Dry + SMc	0.2		50.7	0.8	16.1			6	0.13	12	10.3	3	0.4		0.13	0.02	0			0.639752	Mitchell and Grove, (2015)
	glass	C471	1.2	1363	0			H&Z Dry + SMc	0.28		51.8	0.5	12.4			7.4	0.14	15	10.4	2.4	0.13	0.03	0.3	0.03	0.3			0.83871	Mitchell and Grove, (2015)
	glass	C473	1.6	1340	3.19			22 % H&Z + H2O	0.3		48.9	0.6	12.3			7.3	0.14	14	10	2.1	0.31	0.2	0.34	0.04	3.1			0.813008	Mitchell and Grove, (2015)
	glass	C463	1.6	1380	1.6			11 % H&Z + H2O	0.32		48.9	0.47	11.4			7.6	0.08	16	9.8	2.1	0.4	0.05	0.39	0.07	2.8			0.859649	Mitchell and Grove, (2015)
	glass	C474	1.6	1420	0			H&Z Dry + SMc	0.28		50	0.6	12.8			7.8	0.14	15	10.1	2.3	0.43	0.1	0.3	0.06	0.1			0.789062	Mitchell and Grove, (2015)
	glass	C465	2	1470	0			H&Z Dry + SMc	0.31		49	0.6	10.7			8.3	0.11	17.9	9.2	2.2	0.46	0.04	0.4	0.05	0.9			0.859813	Mitchell and Grove, (2015)
	glass	C544	1.2	1225	0			Dry depleted compositionc	0.06		55.5	0.77	18.9			3.9	0.05	5.41	5.4	7.8	1.6	0.003	0.02	0.01	2.4			0.285714	Mitchell and Grove, (2015)
	glass	C548	1.2	1240	0			Dry depleted compositionc	0.19		56	0.36	11.3			5.7	0.09	11.6	9.5	2.9	0.38	0.03	0.2	0.005	2.6			0.840708	Mitchell and Grove, (2015)
	melt	B256	2	1200				25 % SPMH7.34 and 75 % KLB-1ox	0.2		50	0.6	15.4			6.8	0.08	10	9	2.7	4.6	0.27	0.06		13	8		0.584416	Mallik et al. (2015)
	melt	G301	2	1250				25 % SPMH7.34 and 75 % KLB-1ox	0.275		48	0.71	14			7.4	0.08	12	7.8	2.9	6.3	0.19	0.06		10	6.7		0.557143	Mallik et al. (2015)
	melt	G303	2	1300				25 % SPMH7.34 and 75 % KLB-1ox	0.355		50.4	0.59	13.5			7.4	0.08	13.6	7.1	2.23	4.93	0.12	0.09		8	5.2		0.525926	Mallik et al. (2015)
	melt	G354	3	1225				25 % SPMH7.34 and 75 % KLB-1ox	0		42	0.9	12			9	0.1	16	9	5	5	0.4	0.5		20	20		0.75	Mallik et al. (2015)
	melt	G296	3	1250				25 % SPMH7.34 and 75 % KLB-1ox	0.11		45	0.7	13.6			7.2	0.09	13	11	3.2	6.6	0.4	0.06		14	14		0.808824	Mallik et al. (2015)
	melt	G298	3	1300				25 % SPMH7.34 and 75 % KLB-1ox	0.22		46.3	0.78	13.5			7.8	0.08	13.2	8.2	2.5	7.4	0.21	0.06		12	7.3		0.607407	Mallik et al. (2015)
	melt	G300	3	1350				25 % SPMH7.34 and 75 % KLB-1ox	0.24		47.6	0.75	13.7			7.6	0.08	14	7	2.6	6.6	0.18	0.08		11	8		0.510949	Mallik et al. (2015)
	Melt1	B307	2	1200	4			25% sediment-melt and 75% peridotite	0.304		50.9	0.63	13.5			5.1	0.13	14.5	8.3	2.6	4.1	0.03	0.2		13.2			0.614815	Mallik et al. (2016)
	Melt2	B307	2	1200	4			25% sediment-melt and 75% peridotite	0.241		47	0.79	16.2			5.2	0.16	12.5	10	3.2	4.8	0.16	0.09		16.6			0.617284	Mallik et al. (2016)
	Melt1	B309	2	1250	4			25% sediment-melt and 75% peridotite	0.38		50.3	0.57	12.4			7.4	0.15	15	8	2.7	3.8	0.13	0.3		10.4			0.645161	Mallik et al. (2016)
	Melt2	B309	2	1250	4			25% sediment-melt and 75% peridotite	0.37		48.9	0.61	13.2			6.7	0.13	15	7.6	3	4.3	0.15	0.11		10.9			0.575758	Mallik et al. (2016)
	Melt1	G358	2	1300	4			25% sediment-melt and 75% peridotite	0.53		51	0.44	11			7	0.13	19	5.9	1.9	2.7	0.09	0.28		7.6			0.536364	Mallik et al. (2016)
	Melt1	G376	3	1225	4			25% sediment-melt and 75% peridotite	0.25		46	0.6	13			7	0.14	18	11	3	1.1	0.2	0.14		16			0.846154	Mallik et al. (2016)
	Melt2	G376	3	1225	4			25% sediment-melt and 75% peridotite	0.24		41	0.69	13.9			7.9	0.15	21	8.8	2.6	3.4	0.12	0.15		17			0.633094	Mallik et al. (2016)
	Melt1	G377	3	1275	4			25% sediment-melt and 75% peridotite	0.35		46	0.5	14			7.1	0.18	20	9	2.2	1	0.1	0.13		12			0.642857	Mallik et al. (2016)
	Melt2	G377	3	1275	4			25% sediment-melt and 75% peridotite	0.348		42.7	0.6	13.2			8.1	0.15	22.4	7	2.2	3.2	0.11	0.16		11.5			0.530303	Mallik et al. (2016)
	Melt1	G379	2	1200	6			25% sediment-melt and 75% peridotite	0.47		52	0.43	13			6.2	0.12	16	8	1.7	1.5	0.07	0.18		13			0.615385	Mallik et al. (2016)
	Melt2	G379	2	1200	6			25% sediment-melt and 75% peridotite	0.45		50	0.5	12			7.5	0.14	17	7.5	1.81	2.7	0.07	0.19		13.4			0.625	Mallik et al. (2016)
	Melt1	G380	2	1250	6			25% sediment-melt and 75% peridotite	0.58		52	0.36	12			7	0.13	20	5.1	1.4	2.2	0.08	0.24		10			0.425	Mallik et al. (2016)
	Melt2	G380	2	1250	6			25% sediment-melt and 75% peridotite	0.61		50	0.4	10			7.2	0.14	24	5.3	1.3	2.1	0.07	0.27		9.8			0.53	Mallik et al. (2016)
	Melt1	G381	3	1150	6			25% sediment-melt and 75% peridotite	0.21		44	0.7	17			6	0.14	14	10	5	2.2	0.14	0.1		26			0.588235	Mallik et al. (2016)
	Melt1	G378	3	1200	6			25% sediment-melt and 75% peridotite	0.38		47	0.5	16			6.4	0.14	17	9	2.3	2	0.12	0.15		15.8			0.5625	Mallik et al. (2016)
	Melt2	G378	3	1200	6			25% sediment-melt and 75% peridotite	0.38		45	0.66	12			7.8	0.17	20	8.5	1.7	3.6	0.07	0.17		15.8			0.708333	Mallik et al. (2016)
	Melt1	G374	3	1250	6			25% sediment-melt and 75% peridotite	0.43		49	0.5	12			7.5	0.16	18	10	1.8	1.1	0.08	0.17		15			0.833333	Mallik et al. (2016)
	Melt2	G374	3	1250	6			25% sediment-melt and 75% peridotite	0.375		44	0.59	12.9			10.2	0.2	19.2	7.5	1.7	3.2	0.06	0.19		15.7			0.581395	Mallik et al. (2016)
	Melt1	G375	3	1300	6			25% sediment-melt and 75% peridotite	0.46		49	0.5	13			4.8	0.16	21	8	1.4	3	0.03	0.17		13.1			0.615385	Mallik et al. (2016)
	Melt2	G375	3	1300	6			25% sediment-melt and 75% peridotite	0.46		46.3	0.58	11.6			8	0.16	21	7.9	1.74	3	0.07	0.19		13.8			0.681034	Mallik et al. (2016)
	glass	D287	3.2	1150	4.2			4.2 wt.% H2O experiments	0.25		47.71	0.74	13.03			8.21	0.14	16.1	11.33	1.96	0.44		0.28					0.869532	Grove and Till, (2019)
	glass	D284	3.2	1128	4.2			4.2 wt.% H2O experiments	0.221		46.82	0.95	12.59			8.12	0.16	15.91	12.59	1.97	0.43		0.14					1	Grove and Till, (2019)
	glass	D279	3.2	1100	4.2			4.2 wt.% H2O experiments	0.115		48.72	1.34	13.48			7.38	0.12	14.44	9.14	3.95	1.26		0.12					0.678042	Grove and Till, (2019)
	glass	D276	3.2	1075	4.2			4.2 wt.% H2O experiments	0.08		54.73	1	15.45			7.11	0.05	13.54	3.1	3.4	1.48		0.07					0.200647	Grove and Till, (2019)
	glass	D255	3.2	1050	4.2			4.2 wt.% H2O experiments	0.144		52.59	1.79	16.92			7.54	0.07	13.83	0.73	1.61	4.78		0.12					0.0431442	Grove and Till, (2019)
	glass	D250	3.2	1000	4.2			4.2 wt.% H2O experiments	0.08		57.87	1.23	15.28			6.52	0.07	11.93	1.93	1.95	3.18							0.126309	Grove and Till, (2019)
	glass	D252	3.2	975	4.2			4.2 wt.% H2O experiments	0.075		54.86	1.56	15.09			6.6	0.34	13.54	0.62	1.32	5.18							0.0410868	Grove and Till, (2019)
	glass	D260	3.2	950	4.2			4.2 wt.% H2O experiments	0.051		58.27	1.57	15.15			5.25	0.04	10.43	1.1	2.7	5.31							0.0726073	Grove and Till, (2019)
	glass	D266	3.2	925	4.2			4.2 wt.% H2O experiments	0.082		58.33	1.93	16.8			4.53	0.09	8.68	1.89	1.89	5.66		0.19					0.1125	Grove and Till, (2019)
	glass	D200	3.2	1150	14.2			14.5 wt.% H2O experiments	0.265		49.38	0.61	16.37			7.37	0.42	15.76	8.35	0.34	0.23		0.2					0.510079	Grove and Till, (2019)
	glass	D207	3.2	1125	14.2			14.5 wt.% H2O experiments	0.256		48.71	0.67	13.84			7.95	0.31	14.36	11.58	1.93	0.15		0.16					0.836705	Grove and Till, (2019)
	glass	D205	3.2	1100	14.2			14.5 wt.% H2O experiments	0.149		49.91	1.5	17.18			5.71	0.11	10.36	4.41	0.53	0.28							0.256694	Grove and Till, (2019)
	glass	D206	3.2	1060	14.2			14.5 wt.% H2O experiments	0.107		56.54	1.75	16.04			6.8	0.04	16.26	1.38	0.28	0.15		0.26					0.0860349	Grove and Till, (2019)
	glass	D165	3.2	1020	14.2			14.5 wt.% H2O experiments	0.041		60.2	0.87	19.18			5.02	0.33	10.29	0.84	0.33	1.22							0.0437956	Grove and Till, (2019)
	glass	B458	2	1050	3.51			DP + 10 % MMC	0.062		68	0.2	26			0.6	0.01	0.8	1	1.6	2.3							0.0384615	Lara and Dascupta, (2020)
	glass	B458	2	1050	3.51			DP + 10 % MMC	0.0503		66.81	0.38	25.3			0.72	0.01	1.35	1.64	1.59	2.19							0.0648221	Lara and Dascupta, (2020)
	glass	B459	2	1100	3.51			DP + 10 % MMC	0.1074		59	0.45	14.1			4	0.05	7	9	3.4	0.9							0.638298	Lara and Dascupta, (2020)
	glass	B462	2	1150	3.51			DP + 10 % MMC	0.1258		55	0.42	12			6.9	0.07	15	7	3.2	0.9					28		0.583333	Lara and Dascupta, (2020)
	glass	B464	2	1200	3.51			DP + 10 % MMC	0.1402		52	0.37	13			6.3	0.03	13	10	3.3	0.5					25		0.769231	Lara and Dascupta, (2020)
	glass	B484	2	1250	3.51			DP + 10 % MMC	0.1886		52	0.3	6.7			10	0.16	22	5	3	0.4					19		0.746269	Lara and Dascupta, (2020)
	glass	B450	3	1050	3.51			DP + 10 % MMC	0.045		60	0.88	19			3.9	0.04	6.7	2	3.7	3.2							0.105263	Lara and Dascupta, (2020)
	glass	B453	3	1150	3.51			DP + 10 % MMC	0.116		49	0.5	12			8	0.13	16	9	2.8	1.1					30		0.75	Lara and Dascupta, (2020)
	glass	B473	3	1200	3.51			DP + 10 % MMC	0.1565		48	0.37	9.7			10.3	0.06	24	5	1.8	0.5					22		0.515464	Lara and Dascupta, (2020)
	glass	B486	3	1250	3.51			DP + 10 % MMC	0.2042		50	0.28	6			9	0.07	24	7	2	0.5					17		1.16667	Lara and Dascupta, (2020)
	glass	B474	2	1100	1.75			DP + 10 % MMC	0.0418		70	0.6	22.5			1.2	0.17	0	2	1.8	1							0.0888889	Lara and Dascupta, (2020)
	glass	B474	2	1100	1.75			DP + 5 % MMD	0.055		68.78	0.59	20.61			1.28	0.18	2.28	3.69	1.66	0.92							0.179039	Lara and Dascupta, (2020)
	glass	B488	3	1200	1.75			DP + 5 % MMD	0.0727		44	0.36	11.8			7.5	0.5	19	9	5	0.6					24		0.762712	Lara and Dascupta, (2020)
	melt	4	0.001	1200				Spinel lherzolites			54.2	0.7	15.1			5.6	0.1	8.4	12.3	2.1			0.1					0.81457	Takahashi, (1986)
	melt	21	1	1325				Spinel lherzolites			49.2	0.6	17.7			6.7	0.1	9.5	11.4	2.9			0.1					0.644068	Takahashi, (1986)
	melt	43	3	1550				Spinel lherzolites			46.9	0.9	11			7.8	0.2	19.2	12.2	1.2			0.4					1.10909	Takahashi, (1986)
	melt	53	5	1700				Spinel lherzolites			47.2	0.2	5.1			9.3	0.1	31.3	4.8	0.5			0.5					0.941176	Takahashi, (1986)
	melt	78	8	1900				Spinel lherzolites			46.6	0.2	4.6			8.8	0.2	34.9	3.9	0.3			0.4					0.847826	Takahashi, (1986)
	melt	84	10.5	1950				Spinel lherzolites			45.8	0.2	4.2			9.5	0.2	35.9	3.4	0.3			0.5					0.809524	Takahashi, (1986)
	melt	92	14	1900				Spinel lherzolites			45.2	0.2	4.2			7.9	0.2	37.8	3.7	0.3			0.5					0.880952	Takahashi, (1986)
	melt	1	1	1250				Spinel lherzolites	0.179		50.83	1.12	18.57			7.98	0.28	7.77	9.44	3.69	0.32		n.d.					0.508347	Hirose and Kushiro, (1993)
	melt	2	1	1300				Spinel lherzolites	0.307		49.6	0.79	16.49			8.89	0.12	10.35	11.27	2.15	0.15		0.19					0.683445	Hirose and Kushiro, (1993)
	melt	3	1	1350				Spinel lherzolites	0.412		50.37	0.54	14.53			9.44	0.16	13.46	9.55	1.6	0.14		0.21					0.657261	Hirose and Kushiro, (1993)
	melt	4	1.5	1275				Spinel lherzolites	0.122		49.83	1.07	18.8			8.03	0.08	8.26	7.93	5.41	0.59		n.d.					0.421809	Hirose and Kushiro, (1993)
	melt	5	1.5	1350				Spinel lherzolites	0.279		48.42	0.85	16.6			9.42	0.11	11.25	10.69	2.36	0.09		0.21					0.643976	Hirose and Kushiro, (1993)
	melt	6	1.5	1400				Spinel lherzolites	0.398		48.48	0.78	13.06			10.79	0.21	14.26	10.5	1.66	0.1		0.16					0.803982	Hirose and Kushiro, (1993)
	melt	7	0.2	1350				Spinel lherzolites	0.169		47.41	1.44	15.92			10.38	0.29	10.85	9.26	3.91	0.42		0.12					0.581658	Hirose and Kushiro, (1993)
	melt	8	0.2	1375				Spinel lherzolites	0.253		47.55	1.18	15.61			10.58	0.14	12.01	9.96	2.61	0.25		0.11					0.638053	Hirose and Kushiro, (1993)
	melt	9	0.2	1425				Spinel lherzolites	0.347		47.12	1.17	13.96			10.47	0.12	14.74	10.23	1.9	0.21		0.08					0.732808	Hirose and Kushiro, (1993)
	melt	10	0.25	1425				Spinel lherzolites	0.282		46.82	1.16	13.81			11.68	0.21	13.28	10.22	2.34	0.34		0.14					0.740043	Hirose and Kushiro, (1993)
	melt	11	0.25	1450				Spinel lherzolites	0.418		47.41	0.82	12.29			11.69	0.12	15.54	10.17	1.58	0.19		0.19					0.827502	Hirose and Kushiro, (1993)
	melt	12	0.3	1475				Spinel lherzolites	0.263		45.89	1.4	12.43			12.91	0.2	14.3	9.89	2.51	0.35		0.12					0.795656	Hirose and Kushiro, (1993)
	melt	13	0.3	1500				Spinel lherzolites	0.327		45.59	1.18	12.35			12.56	0.3	15.98	9.67	2.02	0.18		0.17					0.782996	Hirose and Kushiro, (1993)
	melt	14	1	1250				Spinel lherzolites	0.065		51.32	1.09	19.09			6.38	0.23	8.14	8.85	4.6	0.27		0.03					0.463594	Hirose and Kushiro, (1993)
	melt	15	1	1300				Spinel lherzolites	0.121		50.49	0.65	17.94			6.69	0.11	10.08	11.37	2.47	0.09		0.11					0.633779	Hirose and Kushiro, (1993)
	melt	16	1	1350				Spinel lherzolites	0.2		50.67	0.42	14.61			7.64	0.13	13.39	11.17	1.5	0.19		0.28					0.764545	Hirose and Kushiro, (1993)
	melt	17	1	1400				Spinel lherzolites	0.331		51.59	0.44	12.58			7.95	0.29	16.41	9.42	0.91	0.05		0.36					0.748808	Hirose and Kushiro, (1993)
	melt	18	1.5	1300				Spinel lherzolites	0.055		50.71	1.04	19.31			6.37	0.14	8.31	7.75	5.47	0.73		0.17					0.401346	Hirose and Kushiro, (1993)
	melt	19	1.5	1350				Spinel lherzolites	0.189		49.13	0.6	15.18			7.54	0.14	13.11	12.28	1.58	0.08		0.36					0.808959	Hirose and Kushiro, (1993)
	melt	20	1.5	1400				Spinel lherzolites	0.289		49.88	0.45	13.78			7.92	0.13	15.74	10.69	1.04	0.04		0.33					0.775762	Hirose and Kushiro, (1993)
	melt	21	2	1375				Spinel lherzolites	0.135		47.47	0.75	15.53			8.51	0.18	13.94	11.11	2.22	0.08		0.21					0.71539	Hirose and Kushiro, (1993)
	melt	22	2	1425				Spinel lherzolites	0.219		48.74	0.51	13.16			8.8	0.24	15.69	11.06	1.37	0.13		0.3					0.840426	Hirose and Kushiro, (1993)
	melt	23	2.5	1425				Spinel lherzolites	0.126		47.97	0.83	14.88			9.43	0	13.36	10.23	2.37	0.82		0.11					0.6875	Hirose and Kushiro, (1993)
	melt	24	2.5	1450				Spinel lherzolites	0.206		48.37	0.69	13.8			8.47	0.07	15.88	10.93	1.46	0.15		0.18					0.792029	Hirose and Kushiro, (1993)
	melt	25	3	1500				Spinel lherzolites	0.166		45.67	0.99	14.33			9.59	0.17	16.73	10.64	1.8	0.07		0.21					0.742498	Hirose and Kushiro, (1993)
	melt	26	3	1525				Spinel lherzolites	0.347		46.77	0.55	12.87			9.81	0.29	17.82	10.63	0.87	0.09		0.3					0.825952	Hirose and Kushiro, (1993)
	melt	484	0.5	1300				garnet iherzolite	0.255		53.67	0.92	12.45			8.65	0.13	12.03	10.27	1.06	0.55		0.28	0.08				0.8249	Kushiro, (1996)
	melt	489	0.5	1225				garnet iherzolite	0.185		52.75	1.01	16.37			6.75	0.12	8.54	11.64	1.79	0.76		0.19	0.08				0.711057	Kushiro, (1996)
	melt	504	0.5	1175				garnet iherzolite	0.065		55.91	1.74	16.52			5.74	0.09	5.93	8.75	2.92	2.15		0.26					0.529661	Kushiro, (1996)
	melt	477	1	1350				garnet iherzolite	0.292		51.26	0.87	11.95			9.46	0.18	14.36	9.7	1.26	0.48		0.39	0.09				0.811715	Kushiro, (1996)
	melt	476	1	1325				garnet iherzolite	0.23		50.91	0.97	13.19			9.01	0.18	12.85	10.66	1.21	0.62		0.21	0.18				0.808188	Kushiro, (1996)
	melt	473	1	1300				garnet iherzolite	0.209		50.73	1.02	14.48			8.41	0.41	11.21	11.45	1.54	0.67		0.26	0.07				0.790746	Kushiro, (1996)
	melt	470	1	1275				garnet iherzolite	0.215		51	1.07	15.08			7.9	0.18	10.57	11.6	1.62	0.65		0.29	0.03				0.769231	Kushiro, (1996)
	melt	463	1	1250				garnet iherzolite	0.2		50.9	1.17	14.75			8.25	0.23	10.33	11.86	1.47	0.7		0.24	0.11				0.804068	Kushiro, (1996)
	melt	475	1	1225				garnet iherzolite	0.12		50.13	1.67	18.29			7.66	0.27	8.3	10.24	2.03	1.17		0.15	0.1				0.559869	Kushiro, (1996)
	melt	469	1	1200				garnet iherzolite	0.044		53.21	1.79	18.94			5.71	0.13	5.91	7.82	3.18	3.17		0.07	0.09				0.412883	Kushiro, (1996)
	melt	451	1.5	1450				garnet iherzolite	0.378		51.27	0.66	9.22			10.4	0.19	17.33	9.15	0.96	0.37		0.43	0.04				0.992408	Kushiro, (1996)
	melt	453	1.5	1425				garnet iherzolite	0.359		50.26	0.72	10.23			10.02	0.21	16.81	9.6	1.2	0.39		0.51	0.07				0.938416	Kushiro, (1996)
	melt	454	1.5	1400				garnet iherzolite	0.269		50.31	0.89	11.18			9.86	0.13	14.57	10.88	1.3	0.52		0.35	0				0.973166	Kushiro, (1996)
	melt	455	1.5	1350				garnet iherzolite	0.203		49.03	1.23	14.32			9.27	0.13	12.03	11.23	1.69	0.69		0.27	0.1				0.784218	Kushiro, (1996)
	melt	458	1.5	1325				garnet iherzolite	0.184		49.88	1.2	14.21			9.05	0.13	11.55	11.23	1.7	0.76		0.2	0.08				0.790289	Kushiro, (1996)
	melt	457	1.5	1300				garnet iherzolite	0.167		48.68	1.29	16.2			8.61	0.21	10.84	11.05	1.98	0.84		0.19	0.11				0.682099	Kushiro, (1996)
	melt	459	1.5	1275				garnet iherzolite	0.098		49.65	1.65	17.74			7.8	0.19	8.85	9.54	2.93	1.43		0.12	0.03				0.537768	Kushiro, (1996)
	melt	462	2	1450				garnet iherzolite	0.25		48.69	1	11.86			10.12	0.2	15.01	10.94	1.29	0.56		0.3	0.03				0.922428	Kushiro, (1996)
	melt	464	2	1400				garnet iherzolite	0.163		48.19	1.25	14.21			9.96	0.16	13.01	10.56	1.46								0.743139	Kushiro, (1996)
	melt	465	2	1350				garnet iherzolite	0.064		47.5	1.91	16.36			9.24	0.19	10.43	9.55	2.49	2.18		0.09	0.07				0.583741	Kushiro, (1996)
	melt	468	2.5	1500				garnet iherzolite	0.241		47.81	0.92	11			11.38	0.18	16.76	9.93	1.01	0.58		0.36	0.07				0.902727	Kushiro, (1996)
	melt	467	2.5	1450				garnet iherzolite	0.147		46.42	1.47	13.05			10.95	0.2	14.36	10.59	1.68	0.95		0.2	0.14				0.811494	Kushiro, (1996)
	melt	471	2.5	1425				garnet iherzolite	0.068		46.93	1.9	14.77			9.91	0.14	12.28	9.34	2.41	2.07		0.14	0.12				0.632363	Kushiro, (1996)
	melt	474	3	1500				garnet iherzolite	0.181		46.81	1.03	11.45			11.37	0.12	16.89	10.08	1.25	0.77		0.23					0.880349	Kushiro, (1996)
	melt	KH2	3	1480				garnet iherzolite	0.113		45.55	1.6	13.49			11.18	0.19	15.01	9.74	1.8	1.24		0.21					0.722016	Kushiro, (1996)
	melt	KH3	3	1470				garnet iherzolite	0.075		45.63	2	12.54			11.2	0.19	15.24	8.98	2.06	1.88		0.28					0.716108	Kushiro, (1996)
	melt	KH4	3	1460				garnet iherzolite	0.029		46.73	2.23	13.09			10.14	0.13	12.35	7.74	2.55	4.91		0.13					0.591291	Kushiro, (1996)
	melt	30.12	3	1500				Spinel Iherzolite	0.14		46.17	0.91	0.31	13.32		9.55	16.9	10.69	0.18	0.96	0.56							0.580645	Walter, (1998)
	melt	30.07	3	1530				Spinel Iherzolite	0.19		46.66	0.7	0.35	13.06		8.75	17.58	10.92	0.18	0.93	0.41							0.514286	Walter, (1998)
	melt	30.14	3	1540				Spinel Iherzolite	0.24		46.91	0.64	0.43	12.46		8.86	18.22	10.86	0.17	0.82	0.34							0.395349	Walter, (1998)
	melt	30.1	3	1580				Spinel Iherzolite	0.37		48.98	0.48	0.55	11.06		9.45	19.71	8.78	0.18	0.77	0.23							0.327273	Walter, (1998)
	melt	30.11	3	1630				Spinel Iherzolite	0.53		47.96	0.39	0.51	9.5		9.19	23.89	7.7	0.17	0.52	0.22							0.333333	Walter, (1998)
	melt	40.06	4	1590				Spinel Iherzolite	0.09		46.38	1.45	0.33	9.81		10.65	18.58	10.31	0.2	0.93	0.83							0.606061	Walter, (1998)
	melt	40.07	4	1610				Spinel Iherzolite	0.13		45.52	1.27	0.25	10.35		10.65	19.89	9.31	0.19	1.08	0.7							0.76	Walter, (1998)
	melt	40.05	4	1660				Spinel Iherzolite	0.39		46.17	0.46	0.48	10.28		9.67	22.31	8.96	0.19	0.4	0.22							0.395833	Walter, (1998)
	melt	45.03	4.5	1620				Spinel Iherzolite	0.12		45.97	1.66	0.34	8.27		11.72	20.02	9.2	0.21	1.11	0.99							0.617647	Walter, (1998)
	melt	45.02	4.5	1650				Spinel Iherzolite	0.37		46.01	0.49	0.46	9.01		10.12	24.37	8.16	0.19	0.58	0.29							0.413043	Walter, (1998)
	melt	50.01	5	1680				Spinel Iherzolite	0.1		44.78	1.26	0.31	7.15		11.88	22.28	9.54	0.2	0.86	0.6							0.645161	Walter, (1998)
	melt	60.01	6	1710				Spinel Iherzolite	0.11		44.97	1.01	0.35	6.37		12.64	23.26	9.05	0.21	0.8	0.36							0.6	Walter, (1998)
	melt	60.07	6	1740				Spinel Iherzolite	0.19		45.45	0.91	0.41	6.5		11.77	23.88	8.66	0.22	0.86	0.61							0.536585	Walter, (1998)
	melt	60.05	6	1755				Spinel Iherzolite	0.41		46.48	0.49	0.43	7.27		10.24	26.18	7.33	0.19	0.45	0.23							0.44186	Walter, (1998)
	melt	60.03	6	1770				Spinel Iherzolite	0.5		46.9	0.36	0.57	8.79		9.87	26.48	6.8	0.18	0.43	0.18							0.315789	Walter, (1998)
	melt	60.08	6	1800				Spinel Iherzolite	0.65		47.19	0.3	0.52	7.26		8.6	29.34	5.48	0.18	0.39	0.14							0.346154	Walter, (1998)
	melt	70.07	7	1790				Spinel Iherzolite	0.16		45.15	1.23	0.36	5.09		12.53	23.9	8.62	0.23	1.04	0.91							0.638889	Walter, (1998)
	melt	70.02	7	1810				Spinel Iherzolite	0.22		46.11	0.66	0.37	5.43		11.61	25.29	8.49	0.2	0.63	0.3							0.540541	Walter, (1998)
	melt	70.05	7	1820				Spinel Iherzolite	0.35		47.02	0.58	0.49	6.26		10.58	26.65	7.42	0.2	0.56	0.25							0.408163	Walter, (1998)
	melt	70.09	7	1835				Spinel Iherzolite	0.47		47.09	0.43	0.47	6.27		9.64	27.31	7.26	0.19	0.64	0.15							0.404255	Walter, (1998)
	melt	70.08	7	1850				Spinel Iherzolite	0.66		47.33	0.28	0.5	6.45		8.61	30.29	5.61	0.18	0.41	0.11							0.36	Walter, (1998)
	melt	70.06	7	1950				Spinel Iherzolite	0.86		45.39	0.21	0.43	5.72		8.17	34.87	4.27	0.16	0.28	0.13							0.372093	Walter, (1998)
	melt		1	1500				GARNET PYROXENITE			45.6	0.9	15.2			7.8	0.15	16.67	11.48	1.4	0.04	0.01	0.11					0.755263	Hirschmann et al. (2003)
	melt		2	1400				GARNET PYROXENITE			45.1	2	16.2			10.9	0.16	11.1	9.98	2.6	0.05	-	0.03					0.616049	Hirschmann et al. (2003)
	melt		2	1375				GARNET PYROXENITE			44.4	2.3	16.4			12.81	0.1	10.6	9.3	3.78	0.12	0.03	NA					0.567073	Hirschmann et al. (2003)
	melt		2.5	1500				GARNET PYROXENITE			45.2	1.3	15.2			9.1	0.17	15	11.2	1.91	0.05	0.02	0.05					0.736842	Hirschmann et al. (2003)
	melt		2.5	1475				GARNET PYROXENITE			42.7	1.87	14.54			12	0.17	13.54	10.3	3.04	0.09	0.04	NA					0.708391	Hirschmann et al. (2003)
	melt		2.5	1455				GARNET PYROXENITE			42.7	1.87	14.54			12	0.17	13.54	10.3	3.04	0.09	0.04	NA					0.708391	Hirschmann et al. (2003)
	melt	V162	5	1650				garnet pyroxenite	0.19		46.75	3.13	6.38			13.86	0.14	13.39	13.6	2.25	0.05							2.13166	Kogiso et al. (2003)
	melt	V161	5	1675				garnet pyroxenite	0.4		47.35	1.93	10.15			10.69	0.17	13.59	12.8	2.43	0.08							1.26108	Kogiso et al. (2003)
	melt	V157	5	1700				garnet pyroxenite	0.75		46.99	1.13	12.49			8.66	0.16	15.32	12.47	1.8	0.05							0.998399	Kogiso et al. (2003)
References
Brey, G.P., Bulatov, V.K., Girnis, A.V., 2009. Influence of water and fluorine on melting of carbonated peridotite at 6 and 10 GPa. Lithos 112, 249-259.
Dvir, O., Kessel, R., 2017. The effect of CO2 on the water-saturated solidus of K-poor peridotite between 4 and 6GPa. Geochimica et Cosmochimica Acta 206, 184-200.
Dasgupta, R., Hirschmann, M.M., Smith, N.D., 2007. Partial Melting Experiments of Peridotite + CO2 at 3 GPa and Genesis of Alkalic Ocean Island Basalts. Journal of Petrology 48, 2093-2124.
Dasgupta, R., Hirschmann, M.M., Stalker, K., 2006. Immiscible Transition from Carbonate-rich to Silicate-rich Melts in the 3 GPa Melting Interval of Eclogite + CO2 and Genesis of Silica-undersaturated Ocean Island Lavas. Journal of Petrology 47, 647-671.
Foley, S.F., Yaxley, G.M., Rosenthal, A., Buhre, S., Kiseeva, E.S., Rapp, R.P., Jacob, D.E., 2009. The composition of near-solidus melts of peridotite in the presence of CO2 and H2O between 40 and 60 kbar. Lithos 112, 274-283.
Grove, T.L., Till, C.B., 2019. H2O-rich mantle melting near the slab–wedge interface. Contributions to Mineralogy and Petrology 174, 80.
Gaetani, G.A., Grove, T.L., 1998. The influence of water on melting of mantle peridotite. Contributions to Mineralogy and Petrology 131, 323-346.
Hirose, K., Kushiro, I., 1993. Partial melting of dry peridotites at high pressures: Determination of compositions of melts segregated from peridotite using aggregates of diamond. Earth and Planetary Science Letters 114, 477-489.
Hirschmann, M.M., Kogiso, T., Baker, M.B., Stolper, E.M., 2003. Alkalic magmas generated by partial melting of garnet pyroxenite. Geology 31, 481-484.
Hammouda, T., 2003. High-pressure melting of carbonated eclogite and experimental constraints on carbon recycling and storage in the mantle. Earth and Planetary Science Letters 214, 357-368.
Kogiso, T., Hirschmann, M.M., Frost, D.J., 2003. High-pressure partial melting of garnet pyroxenite: possible mafic lithologies in the source of ocean island basalts. Earth and Planetary Science Letters 216, 603-617.
Kushiro, I., 1996. Partial Melting of a Fertile Mantle Peridotite at High Pressures: An Experimental Study Using Aggregates of Diamond, Earth Processes: Reading the Isotopic Code, pp. 109-122.
Lara, M., Dasgupta, R., 2023. Effects of H2O–CO2 Fluids, Temperature, and Peridotite Fertility on Partial Melting in Mantle Wedges and Generation of Primary Arc Basalts. Journal of Petrology 64, egad047.
Lara, M., Dasgupta, R., 2020. Partial melting of a depleted peridotite metasomatized by a MORB-derived hydrous silicate melt – Implications for subduction zone magmatism. Geochimica et Cosmochimica Acta 290, 137-161.
Lara, M., Dasgupta, R., 2022. Carbon recycling efficiency in subduction zones constrained by the effects of H2O-CO2 fluids on partial melt compositions in the mantle wedge. Earth and Planetary Science Letters 588, 117578.
Mitchell, A.L., Grove, T.L., 2015. Melting the hydrous, subarc mantle: the origin of primitive andesites. Contributions to Mineralogy and Petrology 170, 13.
Mallik, A., Nelson, J., Dasgupta, R., 2015. Partial melting of fertile peridotite fluxed by hydrous rhyolitic melt at 2–3 GPa: implications for mantle wedge hybridization by sediment melt and generation of ultrapotassic magmas in convergent margins. Contributions to Mineralogy and Petrology 169, 48.
Mallik, A., Nelson, J., Dasgupta, R., 2015. Partial melting of fertile peridotite fluxed by hydrous rhyolitic melt at 2–3 GPa: implications for mantle wedge hybridization by sediment melt and generation of ultrapotassic magmas in convergent margins. Contributions to Mineralogy and Petrology 169, 48.
Pirard, C., Hermann, J., 2015. Focused fluid transfer through the mantle above subduction zones. Geology 43, 915-918.
Takahashi, E., 1986. Melting of a dry peridotite KLB-1 up to 14 GPa: Implications on the Origin of peridotitic upper mantle. Journal of Geophysical Research: Solid Earth 91, 9367-9382.
Thibault, Y., Edgar, A.D., Lloyd, F.E., 1992. Experimental investigation of melts from a carbonated phlogopite lherzolite: Implications for metasomatism in the continental lithospheric mantle. American Mineralogist 77, 784-794.
Tenner, T.J., Hirschmann, M.M., Humayun, M., 2012. The effect of H2O on partial melting of garnet peridotite at 3.5 GPa. Geochemistry, Geophysics, Geosystems 13.
Walter, M.J., 1998. Melting of Garnet Peridotite and the Origin of Komatiite and Depleted Lithosphere. Journal of Petrology 39, 29-60.
