# Supplementary material for: Carbonate-Capped Seamount Subduction Accelerates CO2-Rich Arc Magma Ascent: Insights from Pagan Volcano, Mariana Arc
Source: Research Square preprint supplement (doi:10.21203/rs.3.rs-6662658/v1), 2025-05-28
Supplement: Supplementary file 3 [file 6bc225003071861d81567900.xlsx]

## Sheet: Standard error
Chemical Compositions of Standard Samples
Sample	Method	SiO2(wt.%)	FeO(wt.%)	MgO(wt.%)	NiO(wt.%)	Cr2O3(wt.%)	Na2O(wt.%)	MnO(wt.%)	CoO(wt.%)	CaO(wt.%)	Al2O3(wt.%)	Total	XFo(mol.%)
MongOL Sh11–2a		40.74	10.17	48.79	0.3591	0.0182	0.0174	0.1445	0.0188	0.0962	0.0462	100.4	89.5277
MongOL Sh11–2 1	EPMA	40.8	10.418	48.976	0.356	0.015	0.028	0.142	0.036	0.095	0.044	100.91	89.336
MongOL Sh11–2 2	EPMA	40.871	10.154	49.032	0.367	0.017	0.011	0.141	0.041	0.097	0.044	100.775	89.5887
MongOL Sh11–2 1	EPMA	40.219	10.23	48.89	0.365	0.019	0.018	0.148	0.031	0.104	0.043	100.067	89.4917
MongOL Sh11–2 2	EPMA	40.32	10.27	48.842	0.362	0.017	0.009	0.146	0.033	0.104	0.041	100.144	89.4457
MongOL Sh11–2 3	EPMA	40.443	10.205	48.842	0.364	0.018	0.021	0.148	0.033	0.105	0.043	100.222	89.5055
MongOL Sh11–2 4	EPMA	40.673	10.248	48.786	0.364	0.018	0.017	0.147	0.033	0.101	0.043	100.43	89.4551
MongOL Sh11–2 5	EPMA	40.174	10.198	48.984	0.368	0.016	0.012	0.146	0.035	0.105	0.043	100.081	89.5391
MongOL Sh11–2 6	EPMA	41.516	10.229	48.105	0.353	0.018	0.019	0.142	0.028	0.099	0.04	100.549	89.3394
MongOL Sh11–2 7	EPMA	41.07	10.217	48.077	0.357	0.023	0.018	0.146	0.031	0.104	0.043	100.086	89.3451
MongOL Sh11–2 8	EPMA	41.195	10.226	48.335	0.355	0.02	0.017	0.145	0.029	0.105	0.041	100.468	89.3876
MongOL Sh11–2 9	EPMA	40.938	10.229	48.256	0.358	0.02	0.014	0.147	0.03	0.098	0.042	100.132	89.3693
Average		40.7472	10.2385	48.6477	0.360818	0.0182727	0.0167273	0.145273	0.0327273	0.101545	0.0424545	100.351	89.437
SD		0.428765	0.0663903	0.373274	0.00519265	0.00219504	0.0052553	0.00249363	0.00366308	0.00369767	0.00129334	0.29709	0.0876001
RSD		1.05226	0.648435	0.767301	1.43913	12.0126	31.4176	1.71652	11.1928	3.64139	3.04641
aBatanova, V.G., Thompson, J.M., Danyushevsky, L.V., Portnyagin, M.V., Garbe-Schönberg, D., Hauri, E., Kimura, J.-I., Chang, Q., Senda, R., Goemann, K., Chauvel, C., Campillo, S., Ionov, D.A., Sobolev, A.V., 2019. New Olivine Reference Material for In Situ Microanalysis. Geostandards and Geoanalytical Research 43, 453-473.

## Sheet: Line 1
The compositions of LINE 1 in olivine from HPD1147 R21 olivine at Pagan volcano
Sample	SiO2(wt.%)	FeO(wt.%)	MgO(wt.%)	NiO(wt.%)	Cr2O3(wt.%)	Na2O(wt.%)	MnO(wt.%)	CoO(wt.%)	CaO(wt.%)	Al2O3(wt.%)	Total	XFo(mol.%)	Ni(ppm)	Mn(ppm)	Distance from edge(um)	Si (ppm)	Al (ppm)	Cr (ppm)	Fe (ppm)	Mn (ppm)	Mg (ppm)	Ca (ppm)	Ni (ppm)	Si_sd (ppm)	Al_sd (ppm)	Cr_sd (ppm)	Fe_sd (ppm)	Mn_sd (ppm)	Mg_sd (ppm)	Ca_sd (ppm)	Ni_sd (ppm)	Fo_sd
R21OL1-32	39.242	13.591	46.003	0.126	0.024	0.089	0.243	0.048	0.271	0.017	99.654	85.7787	994.149	1881.93	0	183408	89.9686	164.209	105641	1881.93	277388	1936.79	990.084	2003.95	6.8447	15.0185	516.04	19.3121	2250.76	26.4266	40.8029	0.000876001
R21OL1-31	39.106	13.393	45.896	0.128	0.025	0.04	0.236	0.046	0.265	0.02	99.155	85.9287	1009.93	1827.72	5	182772	105.845	171.051	104101	1827.72	276743	1893.91	1005.8	2003.95	6.8447	15.0185	516.04	19.3121	2250.76	26.4266	40.8029	0.000876001
R21OL1-30	39.683	13.545	46.451	0.14	0.028	0.035	0.231	0.045	0.262	0.016	100.436	85.9376	1104.61	1789	10	185469	84.6763	191.577	105283	1789	280089	1872.47	1100.09	2003.95	6.8447	15.0185	516.04	19.3121	2250.76	26.4266	40.8029	0.000876001
R21OL1-29	39.614	13.453	46.097	0.147	0.027	0.05	0.231	0.044	0.261	0.021	99.945	85.9275	1159.84	1789	15	185147	111.138	184.735	104568	1789	277955	1865.32	1155.1	2003.95	6.8447	15.0185	516.04	19.3121	2250.76	26.4266	40.8029	0.000876001
R21OL1-28	39.664	13.349	46.264	0.153	0.027	0.091	0.221	0.042	0.257	0.02	100.088	86.0645	1207.18	1711.55	20	185380	105.845	184.735	103759	1711.55	278962	1836.74	1202.25	2003.95	6.8447	15.0185	516.04	19.3121	2250.76	26.4266	40.8029	0.000876001
R21OL1-27	39.596	13.663	46.286	0.155	0.028	0.041	0.22	0.045	0.25	0.021	100.305	85.7891	1222.96	1703.81	25	185063	111.138	191.577	106200	1703.81	279094	1786.71	1217.96	2003.95	6.8447	15.0185	516.04	19.3121	2250.76	26.4266	40.8029	0.000876001
R21OL1-26	39.506	13.328	46.058	0.161	0.028	0.02	0.219	0.041	0.246	0.019	99.626	86.0298	1270.3	1696.06	30	184642	100.553	191.577	103596	1696.06	277719	1758.12	1265.11	2003.95	6.8447	15.0185	516.04	19.3121	2250.76	26.4266	40.8029	0.000876001
R21OL1-25	39.789	13.33	46.316	0.165	0.025	0.017	0.214	0.039	0.257	0.019	100.171	86.095	1301.86	1657.34	35	185965	100.553	171.051	103612	1657.34	279275	1836.74	1296.54	2003.95	6.8447	15.0185	516.04	19.3121	2250.76	26.4266	40.8029	0.000876001
R21OL1-24	39.626	13.409	46.233	0.162	0.025	0.026	0.211	0.04	0.256	0.019	100.007	86.0025	1278.19	1634.1	40	185203	100.553	171.051	104226	1634.1	278775	1829.59	1272.97	2003.95	6.8447	15.0185	516.04	19.3121	2250.76	26.4266	40.8029	0.000876001
R21OL1-23	39.43	13.225	46.072	0.163	0.027	0.017	0.206	0.038	0.256	0.021	99.455	86.1264	1286.08	1595.38	45	184287	111.138	184.735	102796	1595.38	277804	1829.59	1280.82	2003.95	6.8447	15.0185	516.04	19.3121	2250.76	26.4266	40.8029	0.000876001
R21OL1-22	39.882	12.857	46.311	0.167	0.026	0.057	0.205	0.041	0.256	0.019	99.821	86.5206	1317.64	1587.64	50	186399	100.553	177.893	99935.3	1587.64	279245	1829.59	1312.25	2003.95	6.8447	15.0185	516.04	19.3121	2250.76	26.4266	40.8029	0.000876001
R21OL1-21	39.592	12.752	46.714	0.158	0.03	0.001	0.201	0.042	0.245	0.018	99.753	86.7161	1246.63	1556.66	55	185044	95.2609	205.261	99119.1	1556.66	281675	1750.97	1241.53	2003.95	6.8447	15.0185	516.04	19.3121	2250.76	26.4266	40.8029	0.000876001
R21OL1-20	39.756	12.528	47.156	0.153	0.025	0.152	0.201	0.045	0.25	0.019	100.285	87.0256	1207.18	1556.66	60	185810	100.553	171.051	97378	1556.66	284340	1786.71	1202.25	2003.95	6.8447	15.0185	516.04	19.3121	2250.76	26.4266	40.8029	0.000876001
R21OL1-19	39.933	12.127	47.122	0.167	0.027	0.018	0.194	0.039	0.236	0.022	99.885	87.3806	1317.64	1502.45	65	186638	116.43	184.735	94261.1	1502.45	284135	1686.65	1312.25	2003.95	6.8447	15.0185	516.04	19.3121	2250.76	26.4266	40.8029	0.000876001
R21OL1-18	40.067	11.701	47.508	0.166	0.033	0.018	0.19	0.04	0.236	0.02	99.979	87.857	1309.75	1471.47	70	187264	105.845	225.787	90949.9	1471.47	286463	1686.65	1304.4	2003.95	6.8447	15.0185	516.04	19.3121	2250.76	26.4266	40.8029	0.000876001
R21OL1-17	40.111	11.61	47.671	0.18	0.034	0.037	0.184	0.036	0.227	0.025	100.115	87.9763	1420.21	1425	75	187470	132.307	232.629	90242.5	1425	287445	1622.33	1414.41	2003.95	6.8447	15.0185	516.04	19.3121	2250.76	26.4266	40.8029	0.000876001
R21OL1-16	40.131	11.4	47.615	0.195	0.034	0.083	0.179	0.04	0.219	0.022	99.918	88.1558	1538.56	1386.28	80	187563	116.43	232.629	88610.2	1386.28	287108	1565.16	1532.27	2003.95	6.8447	15.0185	516.04	19.3121	2250.76	26.4266	40.8029	0.000876001
R21OL1-15	40.524	11.163	48.406	0.213	0.037	0.145	0.171	0.037	0.207	0.018	100.921	88.5416	1680.58	1324.32	85	189400	95.2609	253.155	86768.1	1324.32	291877	1479.39	1673.71	2003.95	6.8447	15.0185	516.04	19.3121	2250.76	26.4266	40.8029	0.000876001
R21OL1-14	40.67	10.657	48.783	0.238	0.04	0.037	0.17	0.035	0.205	0.024	100.859	89.0796	1877.84	1316.58	90	190082	127.015	273.681	82835	1316.58	294151	1465.1	1870.16	2003.95	6.8447	15.0185	516.04	19.3121	2250.76	26.4266	40.8029	0.000876001
R21OL1-13	40.171	10.422	48.57	0.263	0.047	0.03	0.159	0.029	0.191	0.023	99.905	89.2527	2075.09	1231.39	95	187750	121.722	321.575	81008.4	1231.39	292866	1365.04	2066.6	2003.95	6.8447	15.0185	516.04	19.3121	2250.76	26.4266	40.8029	0.000876001
R21OL1-12	40.351	9.997	48.99	0.284	0.054	0.02	0.157	0.035	0.189	0.024	100.101	89.7253	2240.78	1215.9	100	188591	127.015	369.47	77705	1215.9	295399	1350.75	2231.62	2003.95	6.8447	15.0185	516.04	19.3121	2250.76	26.4266	40.8029	0.000876001
R21OL1-11	40.492	9.758	49.176	0.302	0.051	0.039	0.151	0.028	0.186	0.023	100.206	89.9804	2382.8	1169.43	105	189250	121.722	348.943	75847.3	1169.43	296520	1329.31	2373.06	2003.95	6.8447	15.0185	516.04	19.3121	2250.76	26.4266	40.8029	0.000876001
R21OL1-10	40.654	9.41	49.455	0.309	0.059	0.038	0.142	0.028	0.186	0.047	100.328	90.3525	2438.03	1099.73	110	190007	248.737	403.68	73142.3	1099.73	298203	1329.31	2428.06	2003.95	6.8447	15.0185	516.04	19.3121	2250.76	26.4266	40.8029	0.000876001
R21OL1-9	40.027	8.642	49.123	0.317	0.052	0.031	0.141	0.03	0.18	0.024	98.567	91.0147	2501.15	1091.98	115	187077	127.015	355.786	67172.8	1091.98	296201	1286.43	2490.93	2003.95	6.8447	15.0185	516.04	19.3121	2250.76	26.4266	40.8029	0.000876001
R21OL1-8	40.282	7.925	50.075	0.302	0.056	0.081	0.139	0.031	0.18	0.025	99.096	91.8432	2382.8	1076.5	120	188269	132.307	383.154	61599.7	1076.5	301941	1286.43	2373.06	2003.95	6.8447	15.0185	516.04	19.3121	2250.76	26.4266	40.8029	0.000876001
R21OL1-7	40.448	8.133	49.985	0.308	0.056	0.249	0.131	0.029	0.178	0.024	99.541	91.6332	2430.14	1014.54	125	189045	127.015	383.154	63216.4	1014.54	301398	1272.14	2420.21	2003.95	6.8447	15.0185	516.04	19.3121	2250.76	26.4266	40.8029	0.000876001
R21OL1-6	40.631	7.914	50.593	0.326	0.057	0	0.131	0.028	0.177	0.022	99.879	91.9303	2572.16	1014.54	130	189900	116.43	389.996	61514.2	1014.54	305064	1264.99	2561.65	2003.95	6.8447	15.0185	516.04	19.3121	2250.76	26.4266	40.8029	0.000876001
R21OL1-5	41.212	7.815	50.905	0.326	0.056	0.054	0.126	0.025	0.174	0.025	100.718	92.0682	2572.16	975.816	150	192615	132.307	383.154	60744.7	975.816	306946	1243.55	2561.65	2003.95	6.8447	15.0185	516.04	19.3121	2250.76	26.4266	40.8029	0.000876001
R21OL1-4	39.799	7.446	50.564	0.326	0.059	0.06	0.125	0.028	0.179	0.026	98.612	92.367	2572.16	968.072	170	186011	137.599	403.68	57876.5	968.072	304890	1279.28	2561.65	2003.95	6.8447	15.0185	516.04	19.3121	2250.76	26.4266	40.8029	0.000876001
R21OL1-3	41.046	7.123	51.182	0.319	0.055	0.028	0.122	0.024	0.186	0.023	100.108	92.756	2516.93	944.838	190	191839	121.722	376.312	55365.9	944.838	308616	1329.31	2506.64	2003.95	6.8447	15.0185	516.04	19.3121	2250.76	26.4266	40.8029	0.000876001
R21OL1-2	41.234	7.074	51.034	0.33	0.058	0.045	0.12	0.027	0.183	0.022	100.127	92.7828	2603.72	929.349	210	192718	116.43	396.838	54985	929.349	307724	1307.87	2593.08	2003.95	6.8447	15.0185	516.04	19.3121	2250.76	26.4266	40.8029	0.000876001
R21OL1-1	41.484	7.163	51.721	0.324	0.056	0.007	0.12	0.027	0.182	0.021	101.105	92.7886	2556.38	929.349	230	193887	111.138	383.154	55676.8	929.349	311866	1300.72	2545.93	2003.95	6.8447	15.0185	516.04	19.3121	2250.76	26.4266	40.8029	0.000876001

## Sheet: Line 2
The compositions of LINE 2 in olivine from HPD1147 R21 olivine at Pagan volcano
Sample	SiO2(wt.%)	FeO(wt.%)	MgO(wt.%)	NiO(wt.%)	Cr2O3(wt.%)	Na2O(wt.%)	MnO(wt.%)	CoO(wt.%)	CaO(wt.%)	Al2O3(wt.%)	Total	XFo(mol.%)	Ni(ppm)	Mn(ppm)	Distance from edge(um)	Si (ppm)	Al (ppm)	Cr (ppm)	Fe (ppm)	Mn (ppm)	Mg (ppm)	Ca (ppm)	Ni (ppm)
R21OL2-20	40.095	12.96	45.835	0.163	0.089	0.071	0.212	0.038	0.274	0.024	99.761	86.3057	1286.08	1641.85	0	187395	127.015	608.941	100736	1641.85	276375	1958.23	1280.82
R21OL2-19	40.169	12.283	46.523	0.2	0.052	0.023	0.213	0.043	0.238	0.024	99.768	87.0959	1578.01	1649.59	5	187741	127.015	355.786	95473.7	1649.59	280523	1700.95	1571.56
R21OL2-18	40.201	11.016	47.32	0.239	0.055	0.045	0.192	0.038	0.227	0.024	99.357	88.4456	1885.73	1486.96	10	187890	127.015	376.312	85625.5	1486.96	285329	1622.33	1878.02
R21OL2-17	40.113	10.075	48.008	0.264	0.061	0.207	0.18	0.035	0.218	0.025	99.186	89.464	2082.98	1394.02	15	187479	132.307	417.364	78311.2	1394.02	289478	1558.01	2074.46
R21OL2-16	40.364	9.677	48.705	0.286	0.06	0.027	0.171	0.035	0.201	0.022	99.548	89.9688	2256.56	1324.32	20	188652	116.43	410.522	75217.7	1324.32	293680	1436.51	2247.33
R21OL2-15	40.387	8.891	49.079	0.301	0.058	0.024	0.159	0.033	0.194	0.022	99.148	90.7721	2374.91	1231.39	25	188759	116.43	396.838	69108.2	1231.39	295935	1386.49	2365.2
R21OL2-14	40.566	8.182	49.578	0.305	0.059	0.127	0.148	0.031	0.188	0.022	99.206	91.5239	2406.47	1146.2	30	189596	116.43	403.68	63597.3	1146.2	298944	1343.6	2396.63
R21OL2-13	40.939	8.191	49.864	0.305	0.058	0.119	0.144	0.034	0.186	0.023	99.863	91.5599	2406.47	1115.22	35	191339	121.722	396.838	63667.2	1115.22	300669	1329.31	2396.63
R21OL2-12	41.002	8.017	49.955	0.315	0.06	0.036	0.14	0.032	0.187	0.018	99.762	91.7382	2485.37	1084.24	40	191634	95.2609	410.522	62314.8	1084.24	301217	1336.46	2475.21
R21OL2-11	40.898	7.545	50.538	0.322	0.057	0.049	0.132	0.031	0.185	0.021	99.778	92.2697	2540.6	1022.28	45	191148	111.138	389.996	58646	1022.28	304733	1322.16	2530.22
R21OL2-10	40.808	7.438	50.522	0.307	0.057	0.047	0.13	0.027	0.185	0.017	99.538	92.3688	2422.25	1006.79	50	190727	89.9686	389.996	57814.3	1006.79	304636	1322.16	2412.35
R21OL2-9	40.81	7.33	51.133	0.318	0.058	0.124	0.126	0.032	0.186	0.023	100.14	92.5545	2509.04	975.816	55	190736	121.722	396.838	56974.8	975.816	308321	1329.31	2498.78
R21OL2-8	40.844	7.225	50.752	0.321	0.056	0.076	0.125	0.02	0.174	0.022	99.615	92.6022	2532.71	968.072	60	190895	116.43	383.154	56158.7	968.072	306023	1243.55	2522.36
R21OL2-7	40.835	7.232	50.924	0.322	0.057	0.11	0.118	0.027	0.185	0.007	99.817	92.6188	2540.6	913.86	65	190853	37.0459	389.996	56213.1	913.86	307060	1322.16	2530.22
R21OL2-6	40.914	7.061	51.003	0.326	0.058	0.124	0.121	0.029	0.184	0.024	99.844	92.7911	2572.16	937.093	85	191223	127.015	396.838	54883.9	937.093	307537	1315.02	2561.65
R21OL2-5	40.771	7.125	50.932	0.324	0.05	0.058	0.118	0.027	0.188	0.022	99.615	92.7211	2556.38	913.86	105	190554	116.43	342.101	55381.4	913.86	307109	1343.6	2545.93
R21OL2-4	41.257	6.909	51.588	0.326	0.054	0.062	0.122	0.026	0.181	0.024	100.549	93.0098	2572.16	944.838	125	192826	127.015	369.47	53702.5	944.838	311064	1293.58	2561.65
R21OL2-3	40.859	6.95	51.033	0.325	0.052	0.104	0.121	0.031	0.185	0.022	99.682	92.9002	2564.27	937.093	145	190965	116.43	355.786	54021.2	937.093	307718	1322.16	2553.79
R21OL2-2	41.103	7.041	51.358	0.325	0.055	0.07	0.12	0.023	0.18	0.022	100.297	92.8562	2564.27	929.349	165	192106	116.43	376.312	54728.5	929.349	309677	1286.43	2553.79
R21OL2-1	41.05	6.969	51.419	0.325	0.057	0.056	0.123	0.027	0.184	0.02	100.23	92.9319	2564.27	952.582	185	191858	105.845	389.996	54168.8	952.582	310045	1315.02	2553.79

## Sheet: Line 3
The compositions of LINE 3 in olivine from HPD1147 R21 olivine at Pagan volcano
Sample	SiO2(wt.%)	FeO(wt.%)	MgO(wt.%)	NiO(wt.%)	Cr2O3(wt.%)	Na2O(wt.%)	MnO(wt.%)	CoO(wt.%)	CaO(wt.%)	Al2O3(wt.%)	Total	XFo(mol.%)	Ni(ppm)	Mn(ppm)	Distance from edge(um)	Si (ppm)	Al (ppm)	Cr (ppm)	Fe (ppm)	Mn (ppm)	Mg (ppm)	Ca (ppm)	Ni (ppm)
R21OL5-18	39.782	13.361	46.202	0.129	0.027	0.022	0.234	0.047	0.298	0.018	100.12	86.0376	1017.82	1812.23	0	185932	95.2609	184.735	103853	1812.23	278588	2129.76	1013.66
R21OL5-17	40.005	13.376	46.213	0.127	0.027	0.017	0.237	0.043	0.294	0.022	100.361	86.027	1002.04	1835.46	10	186974	116.43	184.735	103969	1835.46	278654	2101.17	997.942
R21OL5-16	40.1	13.171	46.413	0.134	0.024	0.021	0.237	0.048	0.28	0.015	100.443	86.2628	1057.27	1835.46	20	187418	79.3841	164.209	102376	1835.46	279860	2001.11	1052.95
R21OL5-15	39.851	12.956	46.446	0.126	0.026	0	0.235	0.044	0.29	0.02	99.994	86.465	994.149	1819.97	30	186254	105.845	177.893	100705	1819.97	280059	2072.58	990.084
R21OL5-14	40.057	12.572	46.751	0.131	0.025	0.008	0.227	0.045	0.28	0.02	100.116	86.8881	1033.6	1758.02	40	187217	105.845	171.051	97720	1758.02	281898	2001.11	1029.37
R21OL5-13	40.239	12.351	47.243	0.136	0.023	0.019	0.23	0.043	0.269	0.019	100.572	87.206	1073.05	1781.25	50	188068	100.553	157.367	96002.2	1781.25	284865	1922.5	1068.66
R21OL5-12	39.978	12.073	46.207	0.145	0.024	0.012	0.225	0.043	0.259	0.003	98.969	87.2126	1144.06	1742.53	60	186848	15.8768	164.209	93841.4	1742.53	278618	1851.03	1139.38
R21OL5-11	40.351	11.652	47.136	0.137	0.031	0.022	0.225	0.046	0.263	0.02	99.883	87.8178	1080.94	1742.53	70	188591	105.845	212.103	90569	1742.53	284220	1879.62	1076.52
R21OL5-10	40.32	11.402	47.718	0.161	0.026	0.033	0.218	0.045	0.257	0.02	100.2	88.1765	1270.3	1688.32	80	188446	105.845	177.893	88625.8	1688.32	287729	1836.74	1265.11
R21OL5-9	40.599	11.01	47.986	0.171	0.027	0.019	0.209	0.04	0.251	0.02	100.332	88.5931	1349.2	1618.62	90	189750	105.845	184.735	85578.8	1618.62	289345	1793.85	1343.69
R21OL5-8	40.694	10.695	48.551	0.182	0.031	0.007	0.197	0.042	0.239	0.021	100.659	88.9983	1435.99	1525.68	100	190194	111.138	212.103	83130.4	1525.68	292752	1708.09	1430.12
R21OL5-7	40.589	10.086	48.584	0.179	0.028	0	0.191	0.041	0.229	0.017	99.944	89.5657	1412.32	1479.21	110	189704	89.9686	191.577	78396.7	1479.21	292951	1636.62	1406.55
R21OL5-6	40.579	10.015	48.789	0.22	0.03	0.001	0.182	0.032	0.217	0.019	100.084	89.6706	1735.82	1409.51	120	189657	100.553	205.261	77844.9	1409.51	294187	1550.86	1728.72
R21OL5-5	40.635	9.776	49.166	0.235	0.039	0	0.173	0.036	0.214	0.021	100.295	89.962	1854.17	1339.81	130	189919	111.138	266.839	75987.2	1339.81	296460	1529.42	1846.59
R21OL5-4	40.971	9.647	49.653	0.25	0.047	0	0.173	0.039	0.207	0.028	101.015	90.169	1972.52	1339.81	140	191489	148.184	321.575	74984.5	1339.81	299397	1479.39	1964.45
R21OL5-3	40.704	9.416	49.495	0.248	0.044	0.007	0.167	0.034	0.214	0.018	100.347	90.354	1956.74	1293.34	150	190241	95.2609	301.049	73189	1293.34	298444	1529.42	1948.74
R21OL5-2	41.053	9.326	49.875	0.252	0.041	0.056	0.161	0.034	0.215	0.018	101.031	90.5033	1988.3	1246.88	160	191872	95.2609	280.523	72489.4	1246.88	300735	1536.57	1980.17
R21OL5-1	41.179	9.304	50.11	0.253	0.041	0.01	0.161	0.031	0.213	0.023	101.325	90.5639	1996.19	1246.88	170	192461	121.722	280.523	72318.4	1246.88	302152	1522.28	1988.03

## Sheet: line 4
The compositions of LINE 4 in olivine from HPD1147 R21 olivine at Pagan volcano
Sample	SiO2(wt.%)	FeO(wt.%)	MgO(wt.%)	NiO(wt.%)	Cr2O3(wt.%)	Na2O(wt.%)	MnO(wt.%)	CoO(wt.%)	CaO(wt.%)	Al2O3(wt.%)	Total	XFo(mol.%)	Ni(ppm)	Mn(ppm)	Distance from edge(um)	Si (ppm)	Al (ppm)	Cr (ppm)	Fe (ppm)	Mn (ppm)	Mg (ppm)	Ca (ppm)	Ni (ppm)
R21OL3-33	40.881	13.725	45.507	0.128	0.019	0	0.247	0.041	0.289	0.014	100.851	85.5249	1009.93	1912.91	0	191068	74.0918	129.999	106682	1912.91	274397	2065.43	1005.8
R21OL3-32	40.923	13.173	46.27	0.135	0.02	0	0.234	0.04	0.284	0.012	101.091	86.2244	1065.16	1812.23	6	191265	63.5073	136.841	102391	1812.23	278998	2029.7	1060.8
R21OL3-31	41.077	12.778	46.643	0.147	0.026	0	0.227	0.037	0.276	0.013	101.224	86.6751	1159.84	1758.02	12	191984	68.7995	177.893	99321.2	1758.02	281247	1972.53	1155.1
R21OL3-30	41.051	12.304	47.08	0.159	0.028	0.001	0.215	0.03	0.261	0.012	101.141	87.21	1254.52	1665.08	18	191863	63.5073	191.577	95636.9	1665.08	283882	1865.32	1249.39
R21OL3-29	41.128	11.751	47.403	0.167	0.024	0.003	0.207	0.034	0.262	0.01	100.989	87.7877	1317.64	1603.13	24	192223	52.9227	164.209	91338.5	1603.13	285830	1872.47	1312.25
R21OL3-28	41.184	11.31	48.044	0.183	0.028	0	0.2	0.035	0.25	0.011	101.245	88.3311	1443.88	1548.91	30	192484	58.215	191.577	87910.7	1548.91	289695	1786.71	1437.98
R21OL3-27	41.361	10.885	48.173	0.2	0.034	0.003	0.191	0.034	0.233	0.013	101.127	88.7469	1578.01	1479.21	36	193312	68.7995	232.629	84607.2	1479.21	290472	1665.21	1571.56
R21OL3-26	41.233	10.381	48.083	0.215	0.035	0.01	0.184	0.034	0.235	0.014	100.424	89.1937	1696.36	1425	42	192713	74.0918	239.471	80689.7	1425	289930	1679.51	1689.43
R21OL3-25	41.274	10.094	48.052	0.235	0.037	0	0.182	0.029	0.229	0.013	100.145	89.4549	1854.17	1409.51	48	192905	68.7995	253.155	78458.9	1409.51	289743	1636.62	1846.59
R21OL3-24	41.257	9.65	48.533	0.253	0.043	0.003	0.175	0.033	0.224	0.012	100.183	89.9621	1996.19	1355.3	54	192826	63.5073	294.207	75007.8	1355.3	292643	1600.89	1988.03
R21OL3-23	40.494	9.472	48.751	0.245	0.044	0.005	0.171	0.024	0.221	0.018	99.445	90.1688	1933.07	1324.32	60	189260	95.2609	301.049	73624.2	1324.32	293958	1579.45	1925.16
R21OL3-22	40.999	9.174	49.334	0.256	0.042	0.006	0.164	0.026	0.222	0.014	100.237	90.5507	2019.86	1270.11	66	191620	74.0918	287.365	71307.9	1270.11	297473	1586.6	2011.6
R21OL3-21	41.318	8.949	49.455	0.254	0.041	0	0.161	0.034	0.226	0.014	100.452	90.7816	2004.08	1246.88	72	193111	74.0918	280.523	69559	1246.88	298203	1615.18	1995.88
R21OL3-20	41.306	8.82	49.538	0.244	0.044	0.004	0.161	0.03	0.228	0.012	100.387	90.9162	1925.18	1246.88	78	193055	63.5073	301.049	68556.3	1246.88	298703	1629.48	1917.31
R21OL3-19	41.273	8.713	49.686	0.247	0.04	0.004	0.157	0.022	0.228	0.012	100.382	91.0409	1948.85	1215.9	84	192900	63.5073	273.681	67724.7	1215.9	299595	1629.48	1940.88
R21OL3-18	41.244	8.558	49.601	0.236	0.038	0.006	0.15	0.03	0.226	0.011	100.1	91.1725	1862.06	1161.69	90	192765	58.215	259.997	66519.9	1161.69	299083	1615.18	1854.44
R21OL3-17	41.402	8.526	49.249	0.249	0.041	0.002	0.155	0.026	0.227	0.011	99.888	91.1453	1964.63	1200.41	96	193503	58.215	280.523	66271.1	1200.41	296960	1622.33	1956.6
R21OL3-16	40.601	8.478	49.666	0.247	0.041	0	0.157	0.026	0.23	0.012	99.458	91.2582	1948.85	1215.9	102	189760	63.5073	280.523	65898	1215.9	299475	1643.77	1940.88
R21OL3-15	41.216	8.359	49.286	0.246	0.041	0	0.153	0.031	0.229	0.013	99.574	91.3096	1940.96	1184.92	108	192634	68.7995	280.523	64973.1	1184.92	297184	1636.62	1933.02
R21OL3-14	40.732	8.457	49.593	0.231	0.046	0.004	0.155	0.029	0.228	0	99.475	91.2663	1822.61	1200.41	114	190372	0	314.733	65734.8	1200.41	299035	1629.48	1815.15
R21OL3-13	41.125	8.4	49.722	0.247	0.047	0.001	0.151	0.029	0.225	0.016	99.963	91.3406	1948.85	1169.43	120	192209	84.6763	321.575	65291.8	1169.43	299813	1608.04	1940.88
R21OL3-12	41.063	8.571	49.784	0.261	0.05	0.002	0.155	0.022	0.224	0.02	100.152	91.1899	2059.31	1200.41	126	191919	105.845	342.101	66620.9	1200.41	300186	1600.89	2050.89
R21OL3-11	41.15	8.345	49.775	0.255	0.052	0.008	0.154	0.029	0.226	0.019	100.013	91.4008	2011.97	1192.66	132	192326	100.553	355.786	64864.3	1192.66	300132	1615.18	2003.74
R21OL3-10	41.097	8.484	49.975	0.259	0.054	0.003	0.154	0.032	0.224	0.018	100.3	91.302	2043.53	1192.66	138	192078	95.2609	369.47	65944.7	1192.66	301338	1600.89	2035.17
R21OL3-9	41.317	8.331	49.932	0.251	0.05	0	0.153	0.029	0.222	0.015	100.3	91.4387	1980.41	1184.92	144	193106	79.3841	342.101	64755.4	1184.92	301079	1586.6	1972.31
R21OL3-8	41.298	8.495	50.103	0.264	0.051	0.002	0.153	0.031	0.22	0.016	100.633	91.312	2082.98	1184.92	150	193017	84.6763	348.943	66030.2	1184.92	302110	1572.3	2074.46
R21OL3-7	41.185	8.396	49.786	0.261	0.053	0	0.15	0.029	0.218	0.015	100.093	91.3545	2059.31	1161.69	156	192489	79.3841	362.628	65260.7	1161.69	300198	1558.01	2050.89
R21OL3-6	40.67	8.485	49.906	0.269	0.051	0.001	0.151	0.03	0.215	0.012	99.79	91.29	2122.43	1169.43	162	190082	63.5073	348.943	65952.4	1169.43	300922	1536.57	2113.75
R21OL3-5	41.501	8.256	49.77	0.276	0.055	0.001	0.15	0.029	0.213	0.013	100.264	91.4839	2177.66	1161.69	168	193966	68.7995	376.312	64172.5	1161.69	300102	1522.28	2168.76
R21OL3-4	41.473	8.397	50.26	0.278	0.055	0	0.15	0.03	0.215	0.014	100.872	91.4281	2193.44	1161.69	174	193835	74.0918	376.312	65268.4	1161.69	303057	1536.57	2184.47
R21OL3-3	42.139	8.328	50.389	0.279	0.056	0	0.15	0.027	0.213	0.017	101.598	91.5125	2201.33	1161.69	180	196948	89.9686	383.154	64732.1	1161.69	303834	1522.28	2192.33
R21OL3-2	41.754	8.36	50.451	0.285	0.059	0	0.145	0.022	0.21	0.012	101.298	91.4923	2248.67	1122.96	186	195149	63.5073	403.68	64980.8	1122.96	304208	1500.83	2239.48
R21OL3-1	43.183	8.351	50.872	0.288	0.053	0.005	0.153	0.032	0.209	0.011	103.157	91.565	2272.34	1184.92	192	201827	58.215	362.628	64910.9	1184.92	306747	1493.69	2263.05

## Sheet: line 5
The compositions of LINE 5 in olivine from HPD1147 R21 olivine at Pagan volcano
Sample	SiO2(wt.%)	FeO(wt.%)	MgO(wt.%)	NiO(wt.%)	Cr2O3(wt.%)	Na2O(wt.%)	MnO(wt.%)	CoO(wt.%)	CaO(wt.%)	Al2O3(wt.%)	Total	XFo(mol.%)	Ni(ppm)	Mn(ppm)	Distance from edge(um)	Si (ppm)	Al (ppm)	Cr (ppm)	Fe (ppm)	Mn (ppm)	Mg (ppm)	Ca (ppm)	Ni (ppm)
R21OL5-20	40.157	12.081	45.999	0.153	0.032	0.002	0.236	0.04	0.295	0.014	99.009	87.1548	1207.18	1827.72	0	187685	74.0918	218.945	93903.5	1827.72	277364	2108.32	1202.25
R21OL5-19	40.741	11.737	46.321	0.158	0.035	0.001	0.222	0.04	0.286	0.014	99.555	87.551	1246.63	1719.3	6	190414	74.0918	239.471	91229.7	1719.3	279305	2043.99	1241.53
R21OL5-18	40.641	11.47	46.484	0.176	0.037	0	0.216	0.036	0.273	0.014	99.347	87.8372	1388.65	1672.83	12	189947	74.0918	253.155	89154.3	1672.83	280288	1951.08	1382.97
R21OL5-17	40.966	10.745	46.877	0.185	0.036	0.002	0.204	0.03	0.264	0.013	99.322	88.603	1459.66	1579.89	18	191466	68.7995	246.313	83519	1579.89	282658	1886.76	1453.7
R21OL5-16	40.323	10.52	47.119	0.19	0.037	0	0.199	0.03	0.248	0.001	98.667	88.866	1499.11	1541.17	24	188460	5.29227	253.155	81770.2	1541.17	284117	1772.41	1492.98
R21OL5-15	40.398	10.092	47.283	0.197	0.037	0	0.195	0.033	0.239	0.014	98.488	89.3037	1554.34	1510.19	30	188811	74.0918	253.155	78443.4	1510.19	285106	1708.09	1547.99
R21OL5-14	40.31	9.914	47.883	0.231	0.046	0.005	0.183	0.034	0.23	0.015	98.851	89.5906	1822.61	1417.26	36	188400	79.3841	314.733	77059.8	1417.26	288724	1643.77	1815.15
R21OL5-13	40.761	9.761	48.019	0.23	0.047	0.001	0.178	0.033	0.227	0.021	99.278	89.7609	1814.72	1378.53	42	190507	111.138	321.575	75870.6	1378.53	289544	1622.33	1807.3
R21OL5-12	41.272	9.438	48.474	0.25	0.05	0.001	0.177	0.031	0.223	0.02	99.936	90.1501	1972.52	1370.79	48	192896	105.845	342.101	73360	1370.79	292287	1593.74	1964.45
R21OL5-11	41.242	9.315	48.416	0.257	0.046	0	0.171	0.033	0.22	0.014	99.714	90.2555	2027.75	1324.32	54	192756	74.0918	314.733	72403.9	1324.32	291938	1572.3	2019.46
R21OL5-10	41.308	9.129	48.366	0.257	0.047	0	0.166	0.032	0.221	0.014	99.54	90.4225	2027.75	1285.6	60	193064	74.0918	321.575	70958.2	1285.6	291636	1579.45	2019.46
R21OL5-9	41.186	8.968	48.62	0.264	0.045	0	0.165	0.027	0.219	0.009	99.503	90.6201	2082.98	1277.85	66	192494	47.6304	307.891	69706.7	1277.85	293168	1565.16	2074.46
R21OL5-8	41.331	8.998	48.502	0.263	0.045	0	0.159	0.029	0.217	0.02	99.564	90.5709	2075.09	1231.39	72	193172	105.845	307.891	69939.9	1231.39	292456	1550.86	2066.6
R21OL5-7	41.187	8.658	48.539	0.268	0.045	0	0.159	0.035	0.218	0.016	99.125	90.9011	2114.54	1231.39	78	192498	84.6763	307.891	67297.1	1231.39	292679	1558.01	2105.89
R21OL5-6	41.47	8.612	48.645	0.265	0.047	0.003	0.157	0.03	0.214	0.016	99.459	90.963	2090.87	1215.9	84	193821	84.6763	321.575	66939.6	1215.9	293318	1529.42	2082.32
R21OL5-5	40.546	8.533	48.887	0.267	0.045	0	0.156	0.033	0.216	0.015	98.698	91.0789	2106.65	1208.15	90	189503	79.3841	307.891	66325.5	1208.15	294778	1543.72	2098.04
R21OL5-4	40.981	8.554	49.215	0.269	0.047	0.004	0.156	0.031	0.218	0.016	99.491	91.1132	2122.43	1208.15	96	191536	84.6763	321.575	66488.8	1208.15	296755	1558.01	2113.75
R21OL5-3	41.112	8.455	49.369	0.264	0.043	0.004	0.154	0.03	0.215	0.012	99.658	91.232	2082.98	1192.66	102	192148	63.5073	294.207	65719.3	1192.66	297684	1536.57	2074.46
R21OL5-2	41.35	8.427	49.608	0.269	0.048	0.006	0.152	0.03	0.218	0.005	100.113	91.297	2122.43	1177.18	108	193260	26.4614	328.417	65501.6	1177.18	299125	1558.01	2113.75
R21OL5-1	41.109	8.478	49.47	0.251	0.045	0	0.153	0.028	0.216	0.015	99.765	91.2266	1980.41	1184.92	114	192134	79.3841	307.891	65898	1184.92	298293	1543.72	1972.31

## Sheet: line 6
The compositions of LINE 6 in olivine from HPD1147 R21 olivine at Pagan volcano
Sample	SiO2(wt.%)	FeO(wt.%)	MgO(wt.%)	NiO(wt.%)	Cr2O3(wt.%)	Na2O(wt.%)	MnO(wt.%)	CoO(wt.%)	CaO(wt.%)	Al2O3(wt.%)	Total	XFo(mol.%)	Ni(ppm)	Mn(ppm)	Distance from edge(um)	Si (ppm)	Al (ppm)	Cr (ppm)	Fe (ppm)	Mn (ppm)	Mg (ppm)	Ca (ppm)	Ni (ppm)
R21OL6-23	41.309	13.086	45.726	0.132	0.03	0.001	0.241	0.042	0.307	0.016	100.89	86.1626	1041.49	1866.44	0	193069	84.6763	205.261	101715	1866.44	275718	2194.08	1037.23
R21OL6-22	41.12	12.327	45.887	0.152	0.03	0	0.232	0.039	0.291	0.013	100.091	86.8997	1199.29	1796.74	6	192185	68.7995	205.261	95815.7	1796.74	276688	2079.73	1194.39
R21OL6-21	40.869	11.719	46.193	0.164	0.036	0	0.222	0.033	0.276	0.012	99.524	87.5376	1293.97	1719.3	12	191012	63.5073	246.313	91089.8	1719.3	278533	1972.53	1288.68
R21OL6-20	41.121	11.254	46.738	0.182	0.039	0.003	0.213	0.038	0.265	0.013	99.866	88.0961	1435.99	1649.59	18	192190	68.7995	266.839	87475.4	1649.59	281820	1893.91	1430.12
R21OL6-19	40.967	10.53	47.438	0.202	0.045	0.005	0.2	0.036	0.25	0.011	99.684	88.9233	1593.79	1548.91	24	191470	58.215	307.891	81847.9	1548.91	286041	1786.71	1587.28
R21OL6-18	41.298	10.15	48.146	0.22	0.044	0.002	0.192	0.035	0.24	0.014	100.341	89.4211	1735.82	1486.96	30	193017	74.0918	301.049	78894.2	1486.96	290310	1715.24	1728.72
R21OL6-17	41.433	9.877	48.276	0.23	0.04	0.002	0.185	0.035	0.234	0.014	100.326	89.7012	1814.72	1432.75	36	193648	74.0918	273.681	76772.2	1432.75	291093	1672.36	1807.3
R21OL6-16	41.661	9.317	48.465	0.242	0.048	0	0.177	0.035	0.226	0.022	100.193	90.2625	1909.4	1370.79	42	194714	116.43	328.417	72419.4	1370.79	292233	1615.18	1901.59
R21OL6-15	41.635	9.538	49.005	0.26	0.047	0.002	0.171	0.035	0.223	0.013	100.929	90.1533	2051.42	1324.32	48	194592	68.7995	321.575	74137.2	1324.32	295489	1593.74	2043.03
R21OL6-14	41.753	9.21	49.132	0.267	0.043	0.002	0.165	0.03	0.218	0.012	100.832	90.4819	2106.65	1277.85	54	195144	63.5073	294.207	71587.8	1277.85	296255	1558.01	2098.04
R21OL6-13	41.061	8.892	48.887	0.259	0.046	0	0.165	0.031	0.221	0.009	99.571	90.7383	2043.53	1277.85	60	191910	47.6304	314.733	69116	1277.85	294778	1579.45	2035.17
R21OL6-12	40.863	8.863	49.146	0.26	0.043	0.006	0.159	0.031	0.218	0.011	99.6	90.8099	2051.42	1231.39	66	190984	58.215	294.207	68890.6	1231.39	296339	1558.01	2043.03
R21OL6-11	41.135	8.644	49.314	0.264	0.047	0.002	0.16	0.031	0.221	0.017	99.835	91.0445	2082.98	1239.13	72	192255	89.9686	321.575	67188.3	1239.13	297352	1579.45	2074.46
R21OL6-10	41.144	8.531	49.275	0.257	0.044	0.005	0.153	0.024	0.218	0.015	99.666	91.1448	2027.75	1184.92	78	192298	79.3841	301.049	66310	1184.92	297117	1558.01	2019.46
R21OL6-9	40.998	8.22	49.51	0.266	0.046	0.005	0.156	0.029	0.219	0.017	99.466	91.4771	2098.76	1208.15	84	191615	89.9686	314.733	63892.7	1208.15	298534	1565.16	2090.18
R21OL6-8	41.371	8.401	49.58	0.259	0.051	0	0.152	0.031	0.214	0.017	100.076	91.317	2043.53	1177.18	90	193358	89.9686	348.943	65299.5	1177.18	298956	1529.42	2035.17
R21OL6-7	41.321	8.339	49.764	0.269	0.048	0	0.149	0.03	0.216	0.013	100.149	91.4047	2122.43	1153.94	96	193125	68.7995	328.417	64817.6	1153.94	300066	1543.72	2113.75
R21OL6-6	41.45	8.464	49.283	0.262	0.049	0	0.154	0.028	0.213	0.016	99.919	91.2095	2067.2	1192.66	102	193728	84.6763	335.259	65789.2	1192.66	297165	1522.28	2058.75
R21OL6-5	40.256	8.341	49.188	0.265	0.048	0	0.151	0.026	0.215	0.015	98.505	91.3109	2090.87	1169.43	108	188147	79.3841	328.417	64833.2	1169.43	296593	1536.57	2082.32
R21OL6-4	41.229	8.309	49.223	0.272	0.05	0.001	0.151	0.027	0.214	0.016	99.492	91.347	2146.1	1169.43	114	192695	84.6763	342.101	64584.4	1169.43	296804	1529.42	2137.32
R21OL6-3	40.447	8.151	49.473	0.266	0.048	0.004	0.149	0.029	0.213	0.019	98.799	91.5368	2098.76	1153.94	120	189040	100.553	328.417	63356.3	1153.94	298311	1522.28	2090.18
R21OL6-2	41.11	8.348	49.667	0.279	0.05	0.002	0.15	0.031	0.212	0.015	99.864	91.3809	2201.33	1161.69	126	192139	79.3841	342.101	64887.6	1161.69	299481	1515.13	2192.33
R21OL6-1	41.157	8.207	49.628	0.282	0.05	0.005	0.146	0.029	0.205	0.014	99.723	91.508	2225	1130.71	132	192358	74.0918	342.101	63791.6	1130.71	299246	1465.1	2215.9

## Sheet: line 7
The compositions of LINE 7 in olivine from HPD1147 R21 olivine at Pagan volcano
Sample	SiO2(wt.%)	FeO(wt.%)	MgO(wt.%)	NiO(wt.%)	Cr2O3(wt.%)	Na2O(wt.%)	MnO(wt.%)	CoO(wt.%)	CaO(wt.%)	Al2O3(wt.%)	Total	XFo(mol.%)	Ni(ppm)	Mn(ppm)	Distance from edge(um)	Si (ppm)	Al (ppm)	Cr (ppm)	Fe (ppm)	Mn (ppm)	Mg (ppm)	Ca (ppm)	Ni (ppm)
R21OL7-38	40.651	13.68	45.416	0.104	0.042	0.003	0.267	0.043	0.333	0.012	100.551	85.5408	820.567	2067.8	0	189993	63.5073	287.365	106332	2067.8	273848	2379.89	817.212
R21OL7-37	40.361	13.551	45.683	0.111	0.038	0	0.254	0.034	0.303	0.016	100.351	85.7295	875.798	1967.12	6	188638	84.6763	259.997	105330	1967.12	275458	2165.49	872.217
R21OL7-36	40.228	13.357	45.993	0.122	0.036	0.001	0.254	0.044	0.295	0.015	100.345	85.9867	962.588	1967.12	12	188016	79.3841	246.313	103822	1967.12	277328	2108.32	958.653
R21OL7-35	40.009	13.349	46.056	0.123	0.035	0	0.252	0.042	0.289	0.015	100.17	86.0103	970.478	1951.63	18	186993	79.3841	239.471	103759	1951.63	277707	2065.43	966.511
R21OL7-34	39.929	13.156	45.725	0.117	0.034	0.003	0.251	0.04	0.28	0.014	99.549	86.0986	923.138	1943.89	24	186619	74.0918	232.629	102259	1943.89	275712	2001.11	919.364
R21OL7-33	39.474	13.116	45.943	0.12	0.031	0.005	0.246	0.042	0.283	0.015	99.275	86.1917	946.808	1905.16	30	184492	79.3841	212.103	101948	1905.16	277026	2022.55	942.937
R21OL7-32	40.771	12.053	42.966	0.116	2.755	0.145	0.212	0.034	0.273	0.252	99.577	86.3989	915.248	1641.85	36	190554	1333.65	18849.8	93685.9	1641.85	259075	1951.08	911.506
R21OL7-31	40.041	12.939	45.909	0.132	0.039	0.003	0.242	0.043	0.274	0.013	99.635	86.3439	1041.49	1874.19	42	187142	68.7995	266.839	100573	1874.19	276821	1958.23	1037.23
R21OL7-30	40.279	12.781	46.413	0.139	0.027	0.002	0.234	0.041	0.269	0.011	100.196	86.6152	1096.72	1812.23	48	188255	58.215	184.735	99344.5	1812.23	279860	1922.5	1092.24
R21OL7-29	40.065	12.561	46.64	0.15	0.029	0.003	0.233	0.041	0.265	0.01	99.997	86.8709	1183.51	1804.49	54	187255	52.9227	198.419	97634.5	1804.49	281229	1893.91	1178.67
R21OL7-28	40.36	12.34	46.867	0.149	0.027	0.004	0.233	0.036	0.253	0.008	100.277	87.1266	1175.62	1804.49	60	188633	42.3382	184.735	95916.7	1804.49	282598	1808.15	1170.81
R21OL7-27	39.996	12.123	47.17	0.156	0.025	0.002	0.227	0.04	0.261	0.015	100.015	87.3955	1230.85	1758.02	66	186932	79.3841	171.051	94230	1758.02	284425	1865.32	1225.82
R21OL7-26	40.071	11.96	47.167	0.155	0.029	0.003	0.222	0.042	0.258	0.013	99.92	87.5431	1222.96	1719.3	72	187283	68.7995	198.419	92963	1719.3	284406	1843.88	1217.96
R21OL7-25	39.811	11.647	47.069	0.162	0.031	0.004	0.218	0.04	0.258	0.014	99.254	87.8072	1278.19	1688.32	78	186067	74.0918	212.103	90530.1	1688.32	283816	1843.88	1272.97
R21OL7-24	40.522	11.652	47.367	0.162	0.028	0.001	0.213	0.032	0.258	0.014	100.249	87.87	1278.19	1649.59	84	189390	74.0918	191.577	90569	1649.59	285612	1843.88	1272.97
R21OL7-23	40.852	11.127	47.564	0.167	0.032	0	0.211	0.035	0.253	0.012	100.253	88.3956	1317.64	1634.1	90	190933	63.5073	218.945	86488.3	1634.1	286800	1808.15	1312.25
R21OL7-22	40.064	10.988	47.985	0.158	0.028	0.004	0.206	0.037	0.252	0.012	99.734	88.6131	1246.63	1595.38	96	187250	63.5073	191.577	85407.8	1595.38	289339	1801	1241.53
R21OL7-21	40.92	10.775	48.262	0.17	0.029	0	0.202	0.037	0.245	0.014	100.654	88.8662	1341.31	1564.4	102	191251	74.0918	198.419	83752.2	1564.4	291009	1750.97	1335.83
R21OL7-20	40.457	10.504	48.525	0.185	0.03	0.003	0.195	0.035	0.232	0.015	100.181	89.1684	1459.66	1510.19	108	189087	79.3841	205.261	81645.8	1510.19	292595	1658.06	1453.7
R21OL7-19	40.4	10.17	48.515	0.204	0.036	0.003	0.189	0.034	0.225	0.018	99.794	89.4746	1609.57	1463.72	114	188820	95.2609	246.313	79049.7	1463.72	292535	1608.04	1602.99
R21OL7-18	40.543	10.18	48.427	0.211	0.039	0.001	0.186	0.035	0.223	0.021	99.866	89.4482	1664.8	1440.49	120	189489	111.138	266.839	79127.4	1440.49	292004	1593.74	1658
R21OL7-17	40.767	9.99	48.385	0.229	0.036	0.002	0.181	0.033	0.222	0.013	99.858	89.6167	1806.83	1401.77	126	190536	68.7995	246.313	77650.6	1401.77	291751	1586.6	1799.44
R21OL7-16	40.272	9.792	48.704	0.237	0.039	0.006	0.176	0.032	0.22	0.012	99.49	89.8615	1869.95	1363.04	132	188222	63.5073	266.839	76111.5	1363.04	293674	1572.3	1862.3
R21OL7-15	40.681	9.398	48.756	0.243	0.038	0.005	0.174	0.033	0.216	0.011	99.555	90.239	1917.29	1347.56	138	190134	58.215	259.997	73049	1347.56	293988	1543.72	1909.45
R21OL7-14	40.574	9.381	48.871	0.247	0.038	0	0.17	0.032	0.22	0.014	99.547	90.2756	1948.85	1316.58	144	189633	74.0918	259.997	72916.9	1316.58	294681	1572.3	1940.88
R21OL7-13	40.745	9.24	49.394	0.241	0.041	0.002	0.171	0.031	0.221	0.016	100.102	90.4997	1901.51	1324.32	150	190433	84.6763	280.523	71820.9	1324.32	297835	1579.45	1893.73
R21OL7-12	40.783	9.056	49.625	0.248	0.04	0.001	0.162	0.029	0.224	0.013	100.181	90.7106	1956.74	1254.62	156	190610	68.7995	273.681	70390.7	1254.62	299228	1600.89	1948.74
R21OL7-11	41.093	9.037	49.445	0.238	0.043	0.001	0.159	0.032	0.219	0.015	100.282	90.6977	1877.84	1231.39	162	192059	79.3841	294.207	70243.1	1231.39	298142	1565.16	1870.16
R21OL7-10	40.562	8.781	49.237	0.245	0.041	0	0.158	0.032	0.222	0.014	99.292	90.9025	1933.07	1223.64	168	189577	74.0918	280.523	68253.2	1223.64	296888	1586.6	1925.16
R21OL7-9	41.085	8.706	49.515	0.25	0.041	0	0.155	0.027	0.216	0.013	100.008	91.0193	1972.52	1200.41	174	192022	68.7995	280.523	67670.2	1200.41	298564	1543.72	1964.45
R21OL7-8	40.893	8.714	49.818	0.242	0.042	0	0.161	0.033	0.226	0.01	100.139	91.0616	1909.4	1246.88	180	191124	52.9227	287.365	67732.4	1246.88	300391	1615.18	1901.59
R21OL7-7	41.266	8.649	49.744	0.246	0.042	0.001	0.156	0.028	0.224	0.016	100.372	91.1103	1940.96	1208.15	186	192868	84.6763	287.365	67227.2	1208.15	299945	1600.89	1933.02
R21OL7-6	40.984	8.648	49.817	0.246	0.039	0	0.159	0.032	0.227	0.016	100.168	91.1231	1940.96	1231.39	192	191550	84.6763	266.839	67219.4	1231.39	300385	1622.33	1933.02
R21OL7-5	41.071	8.37	50.004	0.24	0.038	0.001	0.155	0.031	0.22	0.013	100.143	91.4133	1893.62	1200.41	198	191956	68.7995	259.997	65058.6	1200.41	301513	1572.3	1885.87
R21OL7-4	41.384	8.361	50.357	0.246	0.039	0	0.156	0.027	0.221	0.013	100.804	91.4768	1940.96	1208.15	204	193419	68.7995	266.839	64988.6	1208.15	303641	1579.45	1933.02
R21OL7-3	40.897	8.511	50.472	0.243	0.04	0.004	0.148	0.031	0.223	0.016	100.585	91.3552	1917.29	1146.2	210	191143	84.6763	273.681	66154.5	1146.2	304335	1593.74	1909.45
R21OL7-2	40.849	8.492	50.525	0.247	0.041	0.004	0.154	0.032	0.217	0.013	100.574	91.3811	1948.85	1192.66	216	190919	68.7995	280.523	66006.9	1192.66	304654	1550.86	1940.88
R21OL7-1	42.878	8.593	50.806	0.24	0.047	0.005	0.154	0.032	0.227	0.018	103	91.3315	1893.62	1192.66	222	200402	95.2609	321.575	66791.9	1192.66	306349	1622.33	1885.87

## Sheet: line 8
The compositions of LINE 8 in olivine from HPD1147 R21 olivine at Pagan volcano
Sample	SiO2(wt.%)	FeO(wt.%)	MgO(wt.%)	NiO(wt.%)	Cr2O3(wt.%)	Na2O(wt.%)	MnO(wt.%)	CoO(wt.%)	CaO(wt.%)	Al2O3(wt.%)	Total	XFo(mol.%)	Ni(ppm)	Mn(ppm)	Distance from edge(um)	Si (ppm)	Al (ppm)	Cr (ppm)	Fe (ppm)	Mn (ppm)	Mg (ppm)	Ca (ppm)	Ni (ppm)
R21OL8-36	41.095	12.759	45.721	0.145	0.037	0.005	0.241	0.04	0.337	0.012	100.392	86.4602	1144.06	1866.44	0	192069	63.5073	253.155	99173.5	1866.44	275687	2408.48	1139.38
R21OL8-35	40.442	12.658	45.837	0.149	0.033	0.004	0.235	0.041	0.312	0.016	99.727	86.5825	1175.62	1819.97	6	189017	84.6763	225.787	98388.5	1819.97	276387	2229.81	1170.81
R21OL8-34	40.757	12.597	46.473	0.154	0.034	0.001	0.228	0.04	0.294	0.015	100.593	86.7972	1215.07	1765.76	12	190489	79.3841	232.629	97914.3	1765.76	280222	2101.17	1210.1
R21OL8-33	39.97	12.368	46.266	0.161	0.03	0	0.226	0.033	0.292	0.014	99.36	86.9555	1270.3	1750.27	18	186811	74.0918	205.261	96134.3	1750.27	278974	2086.87	1265.11
R21OL8-32	40.098	11.922	46.447	0.158	0.031	0.002	0.225	0.033	0.281	0.015	99.212	87.4095	1246.63	1742.53	24	187409	79.3841	212.103	92667.7	1742.53	280065	2008.26	1241.53
R21OL8-31	40.315	11.504	46.943	0.16	0.029	0	0.213	0.038	0.268	0.008	99.478	87.9104	1262.41	1649.59	30	188423	42.3382	198.419	89418.6	1649.59	283056	1915.35	1257.25
R21OL8-30	40.986	11.504	46.893	0.159	0.031	0.003	0.212	0.034	0.269	0.012	100.103	87.8991	1254.52	1641.85	36	191559	63.5073	212.103	89418.6	1641.85	282754	1922.5	1249.39
R21OL8-29	41.109	11.318	47.365	0.167	0.029	0.004	0.208	0.035	0.256	0.012	100.503	88.1762	1317.64	1610.87	42	192134	63.5073	198.419	87972.9	1610.87	285600	1829.59	1312.25
R21OL8-28	40.897	10.985	47.477	0.168	0.029	0	0.205	0.039	0.251	0.014	100.065	88.5081	1325.53	1587.64	48	191143	74.0918	198.419	85384.5	1587.64	286276	1793.85	1320.11
R21OL8-27	40.765	10.686	47.265	0.176	0.033	0.002	0.198	0.038	0.244	0.015	99.422	88.7411	1388.65	1533.43	54	190526	79.3841	225.787	83060.4	1533.43	284997	1743.83	1382.97
R21OL8-26	40.504	10.588	47.533	0.196	0.04	0	0.191	0.033	0.234	0.021	99.34	88.8888	1546.45	1479.21	60	189306	111.138	273.681	82298.7	1479.21	286613	1672.36	1540.13
R21OL8-25	40.733	10.279	47.871	0.223	0.043	0.004	0.183	0.037	0.228	0.023	99.624	89.2462	1759.49	1417.26	66	190377	121.722	294.207	79896.9	1417.26	288651	1629.48	1752.29
R21OL8-24	40.101	10.161	48.253	0.241	0.038	0	0.185	0.035	0.22	0.014	99.248	89.4319	1901.51	1432.75	72	187423	74.0918	259.997	78979.7	1432.75	290955	1572.3	1893.73
R21OL8-23	40.574	9.853	48.098	0.236	0.037	0	0.178	0.035	0.216	0.014	99.241	89.6896	1862.06	1378.53	78	189633	74.0918	253.155	76585.7	1378.53	290020	1543.72	1854.44
R21OL8-22	40.224	9.658	48.634	0.255	0.042	0.002	0.173	0.035	0.221	0.013	99.257	89.9734	2011.97	1339.81	84	187998	68.7995	287.365	75070	1339.81	293252	1579.45	2003.74
R21OL8-21	41.166	9.254	48.554	0.232	0.039	0.003	0.166	0.032	0.22	0.013	99.679	90.338	1830.5	1285.6	90	192400	68.7995	266.839	71929.8	1285.6	292770	1572.3	1823.01
R21OL8-20	41.062	9.205	49.013	0.253	0.043	0.003	0.165	0.031	0.218	0.015	100.008	90.4657	1996.19	1277.85	96	191914	79.3841	294.207	71548.9	1277.85	295537	1558.01	1988.03
R21OL8-19	41.026	9.079	48.996	0.247	0.04	0.003	0.16	0.026	0.222	0.013	99.812	90.5809	1948.85	1239.13	102	191746	68.7995	273.681	70569.5	1239.13	295435	1586.6	1940.88
R21OL8-18	40.613	8.93	49.339	0.249	0.039	0.004	0.162	0.024	0.219	0.015	99.594	90.7797	1964.63	1254.62	108	189816	79.3841	266.839	69411.4	1254.62	297503	1565.16	1956.6
R21OL8-17	40.594	8.803	49.276	0.247	0.04	0	0.161	0.032	0.222	0.014	99.389	90.8883	1948.85	1246.88	114	189727	74.0918	273.681	68424.2	1246.88	297123	1586.6	1940.88
R21OL8-16	40.462	8.644	49.317	0.252	0.04	0.004	0.157	0.033	0.219	0.017	99.145	91.045	1988.3	1215.9	120	189110	89.9686	273.681	67188.3	1215.9	297370	1565.16	1980.17
R21OL8-15	40.693	8.712	49.342	0.248	0.043	0	0.156	0.032	0.222	0.018	99.466	90.985	1956.74	1208.15	126	190190	95.2609	294.207	67716.9	1208.15	297521	1586.6	1948.74
R21OL8-14	40.811	8.407	49.06	0.247	0.046	0	0.155	0.031	0.228	0.017	99.002	91.2273	1948.85	1200.41	132	190741	89.9686	314.733	65346.2	1200.41	295821	1629.48	1940.88
R21OL8-13	40.697	8.467	48.902	0.244	0.04	0.002	0.154	0.03	0.224	0.015	98.775	91.1442	1925.18	1192.66	138	190208	79.3841	273.681	65812.5	1192.66	294868	1600.89	1917.31
R21OL8-12	40.967	8.425	49.007	0.247	0.044	0	0.158	0.03	0.222	0.018	99.118	91.2015	1948.85	1223.64	144	191470	95.2609	301.049	65486.1	1223.64	295501	1586.6	1940.88
R21OL8-11	40.941	8.532	48.918	0.244	0.043	0.004	0.151	0.028	0.224	0.015	99.1	91.085	1925.18	1169.43	150	191349	79.3841	294.207	66317.8	1169.43	294965	1600.89	1917.31
R21OL8-10	40.794	8.539	49.301	0.247	0.041	0	0.156	0.031	0.224	0.011	99.344	91.1415	1948.85	1208.15	156	190662	58.215	280.523	66372.2	1208.15	297274	1600.89	1940.88
R21OL8-9	40.784	8.539	49.301	0.247	0.041	0	0.156	0.031	0.224	0.011	99.334	91.1415	1948.85	1208.15	162	190615	58.215	280.523	66372.2	1208.15	297274	1600.89	1940.88
R21OL8-8	40.734	8.413	49.422	0.244	0.043	0	0.154	0.025	0.224	0.018	99.277	91.2803	1925.18	1192.66	168	190381	95.2609	294.207	65392.8	1192.66	298004	1600.89	1917.31
R21OL8-7	40.691	8.606	49.125	0.241	0.038	0	0.157	0.03	0.22	0.016	99.124	91.0491	1901.51	1215.9	174	190180	84.6763	259.997	66893	1215.9	296213	1572.3	1893.73
R21OL8-6	41.282	8.566	49.344	0.246	0.04	0.002	0.157	0.017	0.223	0.013	99.89	91.123	1940.96	1215.9	180	192943	68.7995	273.681	66582	1215.9	297533	1593.74	1933.02
R21OL8-5	41.085	8.531	49.077	0.243	0.042	0	0.157	0.032	0.218	0.016	99.401	91.1122	1917.29	1215.9	186	192022	84.6763	287.365	66310	1215.9	295923	1558.01	1909.45
R21OL8-4	40.995	8.543	48.945	0.24	0.04	0	0.156	0.033	0.219	0.018	99.189	91.079	1893.62	1208.15	192	191601	95.2609	273.681	66403.3	1208.15	295127	1565.16	1885.87
R21OL8-3	40.962	8.63	49.245	0.233	0.042	0.002	0.153	0.03	0.221	0.016	99.534	91.0463	1838.39	1184.92	198	191447	84.6763	287.365	67079.5	1184.92	296936	1579.45	1830.87
R21OL8-2	41.3	8.607	48.986	0.243	0.042	0	0.155	0.032	0.22	0.016	99.601	91.025	1917.29	1200.41	204	193027	84.6763	287.365	66900.7	1200.41	295375	1572.3	1909.45
R21OL8-1	40.517	8.566	48.967	0.242	0.043	0	0.155	0.031	0.22	0.017	98.758	91.0608	1909.4	1200.41	210	189367	89.9686	294.207	66582	1200.41	295260	1572.3	1901.59

## Sheet: line 9
The compositions of LINE 9 in olivine from HPD1147 R21 olivine at Pagan volcano
Sample	SiO2(wt.%)	FeO(wt.%)	MgO(wt.%)	NiO(wt.%)	Cr2O3(wt.%)	Na2O(wt.%)	MnO(wt.%)	CoO(wt.%)	CaO(wt.%)	Al2O3(wt.%)	Total	XFo(mol.%)	Ni(ppm)	Mn(ppm)	Distance from edge(um)	Si (ppm)	Al (ppm)	Cr (ppm)	Fe (ppm)	Mn (ppm)	Mg (ppm)	Ca (ppm)	Ni (ppm)
R21OL9-36	39.732	12.713	46.708	0.127	0.021	0.006	0.249	0.042	0.298	0.014	99.91	86.7499	1002.04	1928.4	0	185698	74.0918	143.683	98816	1928.4	281639	2129.76	997.942
R21OL9-35	39.716	12.783	46.635	0.13	0.023	0	0.248	0.041	0.286	0.011	99.873	86.6686	1025.71	1920.65	5	185623	58.215	157.367	99360.1	1920.65	281199	2043.99	1021.52
R21OL9-34	39.916	12.67	46.653	0.129	0.023	0	0.244	0.043	0.284	0.012	99.974	86.7753	1017.82	1889.68	10	186558	63.5073	157.367	98481.7	1889.68	281307	2029.7	1013.66
R21OL9-33	39.731	12.4	46.977	0.131	0.025	0	0.242	0.042	0.276	0.013	99.837	87.0985	1033.6	1874.19	15	185693	68.7995	171.051	96383.1	1874.19	283261	1972.53	1029.37
R21OL9-32	39.81	12.58	47.009	0.136	0.022	0.004	0.24	0.043	0.269	0.012	100.125	86.9434	1073.05	1858.7	20	186063	63.5073	150.525	97782.2	1858.7	283454	1922.5	1068.66
R21OL9-31	39.993	12.25	46.972	0.133	0.026	0.001	0.237	0.039	0.271	0.013	99.935	87.2334	1049.38	1835.46	25	186918	68.7995	177.893	95217.1	1835.46	283231	1936.79	1045.09
R21OL9-30	39.877	12.104	47.615	0.154	0.028	0.021	0.235	0.04	0.265	0.012	100.351	87.5157	1215.07	1819.97	30	186376	63.5073	191.577	94082.3	1819.97	287108	1893.91	1210.1
R21OL9-29	39.862	11.991	47.699	0.154	0.03	0	0.228	0.04	0.264	0.013	100.281	87.6369	1215.07	1765.76	35	186306	68.7995	205.261	93204	1765.76	287614	1886.76	1210.1
R21OL9-28	39.999	11.836	48.175	0.162	0.03	0.013	0.224	0.04	0.264	0.011	100.754	87.8833	1278.19	1734.78	40	186946	58.215	205.261	91999.2	1734.78	290484	1886.76	1272.97
R21OL9-27	39.987	11.591	48.279	0.166	0.025	0.012	0.222	0.038	0.259	0.011	100.59	88.1269	1309.75	1719.3	45	186890	58.215	171.051	90094.9	1719.3	291112	1851.03	1304.4
R21OL9-26	39.923	11.609	48.173	0.163	0.025	0.004	0.218	0.039	0.261	0.012	100.427	88.0876	1286.08	1688.32	50	186591	63.5073	171.051	90234.8	1688.32	290472	1865.32	1280.82
R21OL9-25	40.076	11.418	48.556	0.143	0.024	0.002	0.216	0.038	0.263	0.012	100.748	88.3424	1128.28	1672.83	55	187306	63.5073	164.209	88750.2	1672.83	292782	1879.62	1123.67
R21OL9-24	40.062	11.061	48.485	0.163	0.027	0.01	0.212	0.038	0.257	0.013	100.328	88.6508	1286.08	1641.85	60	187241	68.7995	184.735	85975.3	1641.85	292354	1836.74	1280.82
R21OL9-23	40.198	10.903	48.945	0.155	0.031	0	0.208	0.04	0.252	0.012	100.744	88.8884	1222.96	1610.87	65	187876	63.5073	212.103	84747.1	1610.87	295127	1801	1217.96
R21OL9-22	40.154	10.841	49.304	0.176	0.024	0.006	0.201	0.037	0.248	0.011	101.002	89.0163	1388.65	1556.66	75	187670	58.215	164.209	84265.2	1556.66	297292	1772.41	1382.97
R21OL9-21	40.393	10.432	49.222	0.186	0.032	0	0.198	0.037	0.239	0.015	100.754	89.3709	1467.55	1533.43	85	188788	79.3841	218.945	81086.1	1533.43	296798	1708.09	1461.55
R21OL9-20	40.213	10.318	49.467	0.205	0.03	0.016	0.19	0.036	0.228	0.01	100.713	89.5215	1617.46	1471.47	95	187946	52.9227	205.261	80200	1471.47	298275	1629.48	1610.85
R21OL9-19	40.246	9.944	49.825	0.229	0.037	0.007	0.186	0.037	0.224	0.015	100.75	89.9283	1806.83	1440.49	105	188100	79.3841	253.155	77293	1440.49	300434	1600.89	1799.44
R21OL9-18	40.338	9.593	49.894	0.228	0.035	0.002	0.184	0.033	0.222	0.007	100.536	90.2613	1798.94	1425	115	188530	37.0459	239.471	74564.7	1425	300850	1586.6	1791.58
R21OL9-17	40.173	9.727	49.873	0.242	0.039	0	0.18	0.034	0.223	0.006	100.497	90.1349	1909.4	1394.02	125	187759	31.7536	266.839	75606.3	1394.02	300723	1593.74	1901.59
R21OL9-16	40.282	9.51	50.086	0.247	0.037	0.002	0.175	0.035	0.224	0.007	100.605	90.3709	1948.85	1355.3	135	188269	37.0459	253.155	73919.6	1355.3	302007	1600.89	1940.88
R21OL9-15	40.381	9.291	49.909	0.237	0.041	0.011	0.174	0.034	0.222	0.009	100.309	90.5414	1869.95	1347.56	145	188731	47.6304	280.523	72217.3	1347.56	300940	1586.6	1862.3
R21OL9-14	40.15	9.06	50.433	0.255	0.037	0.001	0.172	0.034	0.22	0.011	100.373	90.8421	2011.97	1332.07	155	187652	58.215	253.155	70421.8	1332.07	304100	1572.3	2003.74
R21OL9-13	40.743	9.037	50.527	0.254	0.036	0.001	0.17	0.034	0.22	0.011	101.033	90.8787	2004.08	1316.58	165	190423	58.215	246.313	70243.1	1316.58	304667	1572.3	1995.88
R21OL9-12	40.547	8.989	50.382	0.246	0.038	0	0.167	0.032	0.224	0.015	100.64	90.899	1940.96	1293.34	175	189507	79.3841	259.997	69870	1293.34	303792	1600.89	1933.02
R21OL9-11	40.546	8.739	50.463	0.248	0.04	0	0.163	0.034	0.223	0.015	100.471	91.1426	1956.74	1262.37	185	189503	79.3841	273.681	67926.7	1262.37	304281	1593.74	1948.74
R21OL9-10	40.468	8.736	50.698	0.244	0.04	0	0.159	0.032	0.223	0.014	100.614	91.1828	1925.18	1231.39	186	189138	74.0918	273.681	67903.4	1231.39	305698	1593.74	1917.31
R21OL9-9	40.528	8.46	50.506	0.254	0.041	0.007	0.156	0.032	0.226	0.014	100.224	91.4078	2004.08	1208.15	187	189418	74.0918	280.523	65758.1	1208.15	304540	1615.18	1995.88
R21OL9-8	40.327	8.609	51.297	0.247	0.04	0	0.159	0.031	0.223	0.014	100.947	91.3927	1948.85	1231.39	188	188479	74.0918	273.681	66916.3	1231.39	309309	1593.74	1940.88
R21OL9-7	40.424	8.712	51.007	0.253	0.042	0	0.159	0.032	0.226	0.013	100.868	91.2536	1996.19	1231.39	189	188932	68.7995	287.365	67716.9	1231.39	307561	1615.18	1988.03
R21OL9-6	40.532	8.658	50.997	0.252	0.042	0	0.157	0.033	0.221	0.017	100.909	91.3015	1988.3	1215.9	190	189437	89.9686	287.365	67297.1	1215.9	307501	1579.45	1980.17
R21OL9-5	40.607	8.42	50.951	0.242	0.042	0	0.158	0.033	0.228	0.017	100.698	91.5133	1909.4	1223.64	191	189788	89.9686	287.365	65447.2	1223.64	307223	1629.48	1901.59
R21OL9-4	40.588	8.51	51.269	0.251	0.04	0.001	0.159	0.033	0.223	0.013	101.087	91.479	1980.41	1231.39	192	189699	68.7995	273.681	66146.8	1231.39	309141	1593.74	1972.31
R21OL9-3	40.797	8.554	51.032	0.24	0.039	0	0.161	0.033	0.226	0.016	101.098	91.4024	1893.62	1246.88	193	190676	84.6763	266.839	66488.8	1246.88	307712	1615.18	1885.87
R21OL9-2	40.964	8.326	51.049	0.249	0.041	0	0.161	0.031	0.227	0.016	101.064	91.6149	1964.63	1246.88	194	191456	84.6763	280.523	64716.6	1246.88	307814	1622.33	1956.6
R21OL9-1	40.797	8.474	50.863	0.246	0.039	0	0.158	0.033	0.225	0.016	100.851	91.45	1940.96	1223.64	195	190676	84.6763	266.839	65866.9	1223.64	306693	1608.04	1933.02

[truncated: 13 more sheets: line 10, line 11, line 12, line 13, line 14, line 15, line 16, line 17, line 18, line 19, line 20, Results summary of timescales, Model conditions in DIPRA]
