# Supplementary material for: Carbonate-Capped Seamount Subduction Accelerates CO2-Rich Arc Magma Ascent: Insights from Pagan Volcano, Mariana Arc
Source: Research Square preprint supplement (doi:10.21203/rs.3.rs-6662658/v1), 2025-05-28
Supplement: Supplementary file 4 [file a1918062493d0d9b76bac6f3.xlsx]

## Sheet: Sheet1
Supplementary Table S8. Estimates of carbon influx and outflux in the Mariana subduction zone system
	CO2 contents (wt.%)	C contents (wt.%)1	Thickness (km)2	Average summit diameter (km)2	subduction rate (seamounts/Myr)	Density (g/cm3)	C influx (Mt/Myr)
Guyot		11.4	0.331	28.61	5	2.4	0.29
	CO2 contents (wt.%)3	C contents (wt.%)	Thickness (km)3	Length (km)4	subduction rate (km/Myr)4	Density (g/cm3)3	C influx (Mt/Myr)
Sediment	2.61	0.71253	0.48	1812	47	1.86	0.54
	ave Nb(ppm)a	std	mantle/mass fraction of mantle end-member in arc CO2b	std	CO2/Nb	Arc CO2 from mantle (ppm)	Primary arc CO2 (ppm)	std	C contents (wt.%)	std	ARC magmatic addition rate (km3/km/Myr)	Length (km)	Density (kg/km3)	C outflux (Mt/Myr)
Magma	1.0926	0.129	0.1088	0.0482	600	655.56	6025.37	2762.5	0.00167144	0.000766	40	1370	2.73	0.25
a. The arc Nb value was obtained by averaging the volcanic Nb content of each Mariana volcano, followed by averaging across all volcano means. Volcanics data are filitered basalt with MgO > 4wt.% from ref. 5.
b. The mantle/mass fraction of mantle end-member also was the average of individual Mariana volcano means, obtained by CO2/3He and δ13C ratios using the equation from ref.6. CO2/3He and δ13C ratios from ref.7.
ref
1 Watkins DK, et al. Stratigraphy and Sediment Accumulation Patterns of the Upper Cenozoic Pelagic Carbonate Caps of Guyots in the Northwestern Pacific Ocean.) (1995)
2 Van Waasbergen RJ, Winterer EL. Summit geomorphology of western Pacific guyots. Geophysical Monograph Series 77, 335-366 (1993)
3 Plank T, Langmuir CH. The chemical composition of subducting sediment and its consequences for the crust and mantle. Chemical Geology 145, 325-394 (1998).
4 Jarrard RD. Subduction fluxes of water, carbon dioxide, chlorine, and potassium. Geochemistry, Geophysics, Geosystems 4, (2003).
5Team, D., 2024. 2024-12-PVFZCE_IZU-BONIN-MARIANA_ARC.csv, GEOROC Compilation: Convergent Margins, V10 ed. GRO.data.
6Sano, Y., Marty, B., 1995. Origin of carbon in fumarolic gas from island arcs. Chemical Geology 119, 265-274.
7Lupton, J., Butterfield, D., Lilley, M., Evans, L., Nakamura, K.-i., Chadwick Jr, W., Resing, J., Embley, R., Olson, E., Proskurowski, G., Baker, E., de Ronde, C., Roe, K., Greene, R., Lebon, G., Young, C., 2006. Submarine venting of liquid carbon dioxide on a Mariana Arc volcano. Geochemistry, Geophysics, Geosystems 7.
